# Supplementary material for: Experimental Genome-Wide Determination of RNA Polyadenylation in Chlamydomonas reinhardtii
Source: PLoS One. 2016 Jan 5;11(1):e0146107. doi: 10.1371/journal.pone.0146107 (PMC4701671; doi:10.1371/journal.pone.0146107)
Supplement: S7 File — (XLSX) [file pone.0146107.s013.xlsx]

## Sheet: unannotatedclosest.txt
Chromosome	start	end	PAT number	strand	location of nearest feature	genomic region of nearest feature	start of nearest feature	end of nearest feature	strand of nearest feature	geneID for nearest feature	distance to nearest feature
chromosome_15	1583353	1583354	12	-	chromosome_15	five_prime_UTR	1660478	1660814	+	ID=Cre15.g644050.t1.1.v5.5.five_prime_UTR.1;Parent=Cre15.g644050.t1.1.v5.5;pacid=30783692	-77124
chromosome_12	6653010	6653011	16	-	chromosome_12	five_prime_UTR	6705523	6705606	+	ID=Cre12.g539206.t1.1.v5.5.five_prime_UTR.1;Parent=Cre12.g539206.t1.1.v5.5;pacid=30793167	-52512
chromosome_scaffold_19	197250	197251	11	+	chromosome_scaffold_19	five_prime_UTR	168554	168698	-	ID=Cre19.g751047.t1.1.v5.5.five_prime_UTR.1;Parent=Cre19.g751047.t1.1.v5.5;pacid=30778345	-28553
chromosome_16	2492965	2492966	14	-	chromosome_16	five_prime_UTR	2519399	2519671	+	ID=Cre16.g661100.t1.2.v5.5.five_prime_UTR.1;Parent=Cre16.g661100.t1.2.v5.5;pacid=30778176	-26433
chromosome_16	2492967	2492968	20	-	chromosome_16	five_prime_UTR	2519399	2519671	+	ID=Cre16.g661100.t1.2.v5.5.five_prime_UTR.1;Parent=Cre16.g661100.t1.2.v5.5;pacid=30778176	-26431
chromosome_3	6779556	6779557	27	+	chromosome_3	five_prime_UTR	6753168	6753465	-	ID=Cre03.g198100.t1.2.v5.5.five_prime_UTR.1;Parent=Cre03.g198100.t1.2.v5.5;pacid=30787453	-26092
chromosome_16	3275305	3275306	19	+	chromosome_16	five_prime_UTR	3249077	3249235	-	ID=Cre16.g666602.t1.1.v5.5.five_prime_UTR.1;Parent=Cre16.g666602.t1.1.v5.5;pacid=30777360	-26071
chromosome_5	3280372	3280373	14	+	chromosome_5	five_prime_UTR	3254372	3254691	-	ID=Cre05.g240150.t1.2.v5.5.five_prime_UTR.1;Parent=Cre05.g240150.t1.2.v5.5;pacid=30783260	-25682
chromosome_5	3280370	3280371	58	+	chromosome_5	five_prime_UTR	3254372	3254691	-	ID=Cre05.g240150.t1.2.v5.5.five_prime_UTR.1;Parent=Cre05.g240150.t1.2.v5.5;pacid=30783260	-25680
chromosome_5	3280368	3280369	10	+	chromosome_5	five_prime_UTR	3254372	3254691	-	ID=Cre05.g240150.t1.2.v5.5.five_prime_UTR.1;Parent=Cre05.g240150.t1.2.v5.5;pacid=30783260	-25678
chromosome_16	3274080	3274081	10	+	chromosome_16	five_prime_UTR	3249077	3249235	-	ID=Cre16.g666602.t1.1.v5.5.five_prime_UTR.1;Parent=Cre16.g666602.t1.1.v5.5;pacid=30777360	-24846
chromosome_9	5350673	5350674	17	-	chromosome_9	five_prime_UTR	5375338	5375716	+	ID=Cre09.g399923.t1.1.v5.5.five_prime_UTR.1;Parent=Cre09.g399923.t1.1.v5.5;pacid=30781011	-24664
chromosome_9	5350675	5350676	26	-	chromosome_9	five_prime_UTR	5375338	5375716	+	ID=Cre09.g399923.t1.1.v5.5.five_prime_UTR.1;Parent=Cre09.g399923.t1.1.v5.5;pacid=30781011	-24662
chromosome_11	2173244	2173245	26	-	chromosome_11	five_prime_UTR	2197363	2197480	+	ID=Cre11.g472226.t1.1.v5.5.five_prime_UTR.1;Parent=Cre11.g472226.t1.1.v5.5;pacid=30775813	-24118
chromosome_11	2173246	2173247	13	-	chromosome_11	five_prime_UTR	2197363	2197480	+	ID=Cre11.g472226.t1.1.v5.5.five_prime_UTR.1;Parent=Cre11.g472226.t1.1.v5.5;pacid=30775813	-24116
chromosome_15	1636506	1636507	11	-	chromosome_15	five_prime_UTR	1660478	1660814	+	ID=Cre15.g644050.t1.1.v5.5.five_prime_UTR.1;Parent=Cre15.g644050.t1.1.v5.5;pacid=30783692	-23971
chromosome_15	1636508	1636509	23	-	chromosome_15	five_prime_UTR	1660478	1660814	+	ID=Cre15.g644050.t1.1.v5.5.five_prime_UTR.1;Parent=Cre15.g644050.t1.1.v5.5;pacid=30783692	-23969
chromosome_15	1636509	1636510	43	-	chromosome_15	five_prime_UTR	1660478	1660814	+	ID=Cre15.g644050.t1.1.v5.5.five_prime_UTR.1;Parent=Cre15.g644050.t1.1.v5.5;pacid=30783692	-23968
chromosome_15	1636510	1636511	90	-	chromosome_15	five_prime_UTR	1660478	1660814	+	ID=Cre15.g644050.t1.1.v5.5.five_prime_UTR.1;Parent=Cre15.g644050.t1.1.v5.5;pacid=30783692	-23967
chromosome_15	1636511	1636512	44	-	chromosome_15	five_prime_UTR	1660478	1660814	+	ID=Cre15.g644050.t1.1.v5.5.five_prime_UTR.1;Parent=Cre15.g644050.t1.1.v5.5;pacid=30783692	-23966
chromosome_15	1637019	1637020	17	-	chromosome_15	five_prime_UTR	1660478	1660814	+	ID=Cre15.g644050.t1.1.v5.5.five_prime_UTR.1;Parent=Cre15.g644050.t1.1.v5.5;pacid=30783692	-23458
chromosome_5	3277553	3277554	20	+	chromosome_5	five_prime_UTR	3254372	3254691	-	ID=Cre05.g240150.t1.2.v5.5.five_prime_UTR.1;Parent=Cre05.g240150.t1.2.v5.5;pacid=30783260	-22863
chromosome_5	3277551	3277552	53	+	chromosome_5	five_prime_UTR	3254372	3254691	-	ID=Cre05.g240150.t1.2.v5.5.five_prime_UTR.1;Parent=Cre05.g240150.t1.2.v5.5;pacid=30783260	-22861
chromosome_scaffold_28	54765	54766	26	+	chromosome_scaffold_28	five_prime_UTR	31650	32435	-	ID=Cre28.g757697.t1.1.v5.5.five_prime_UTR.1;Parent=Cre28.g757697.t1.1.v5.5;pacid=30782928	-22331
chromosome_13	1672392	1672393	100	+	chromosome_13	five_prime_UTR	1650031	1650119	-	ID=Cre13.g573850.t1.1.v5.5.five_prime_UTR.1;Parent=Cre13.g573850.t1.1.v5.5;pacid=30784459	-22274
chromosome_9	591427	591428	18	+	chromosome_9	five_prime_UTR	570395	570503	-	ID=Cre09.g403800.t1.2.v5.5.five_prime_UTR.1;Parent=Cre09.g403800.t1.2.v5.5;pacid=30780908	-20925
chromosome_2	2591258	2591259	10	+	chromosome_2	five_prime_UTR	2570397	2570667	-	ID=Cre02.g092926.t1.1.v5.5.five_prime_UTR.1;Parent=Cre02.g092926.t1.1.v5.5;pacid=30784865	-20592
chromosome_2	2591257	2591258	17	+	chromosome_2	five_prime_UTR	2570397	2570667	-	ID=Cre02.g092926.t1.1.v5.5.five_prime_UTR.1;Parent=Cre02.g092926.t1.1.v5.5;pacid=30784865	-20591
chromosome_2	2591256	2591257	21	+	chromosome_2	five_prime_UTR	2570397	2570667	-	ID=Cre02.g092926.t1.1.v5.5.five_prime_UTR.1;Parent=Cre02.g092926.t1.1.v5.5;pacid=30784865	-20590
chromosome_14	3121814	3121815	12	+	chromosome_14	five_prime_UTR	3101722	3101765	-	ID=Cre14.g628650.t1.2.v5.5.five_prime_UTR.1;Parent=Cre14.g628650.t1.2.v5.5;pacid=30776141	-20050
chromosome_14	3121812	3121813	17	+	chromosome_14	five_prime_UTR	3101722	3101765	-	ID=Cre14.g628650.t1.2.v5.5.five_prime_UTR.1;Parent=Cre14.g628650.t1.2.v5.5;pacid=30776141	-20048
chromosome_9	1541779	1541780	16	+	chromosome_9	five_prime_UTR	1522425	1522458	-	ID=Cre09.g397950.t1.1.v5.5.five_prime_UTR.1;Parent=Cre09.g397950.t1.1.v5.5;pacid=30780244	-19322
chromosome_scaffold_22	26213	26214	11	+	chromosome_scaffold_22	five_prime_UTR	7769	8013	-	ID=Cre22.g753447.t1.1.v5.5.five_prime_UTR.1;Parent=Cre22.g753447.t1.1.v5.5;pacid=30778274	-18201
chromosome_17	4089861	4089862	11	+	chromosome_17	five_prime_UTR	4070947	4071745	-	ID=Cre17.g729301.t1.1.v5.5.five_prime_UTR.1;Parent=Cre17.g729301.t1.1.v5.5;pacid=30782216	-18117
chromosome_1	879	880	28	-	chromosome_1	five_prime_UTR	18766	19162	+	ID=Cre01.g000017.t1.1.v5.5.five_prime_UTR.1;Parent=Cre01.g000017.t1.1.v5.5;pacid=30789166	-17886
chromosome_1	900	901	19	-	chromosome_1	five_prime_UTR	18766	19162	+	ID=Cre01.g000017.t1.1.v5.5.five_prime_UTR.1;Parent=Cre01.g000017.t1.1.v5.5;pacid=30789166	-17865
chromosome_1	906	907	46	-	chromosome_1	five_prime_UTR	18766	19162	+	ID=Cre01.g000017.t1.1.v5.5.five_prime_UTR.1;Parent=Cre01.g000017.t1.1.v5.5;pacid=30789166	-17859
chromosome_13	2782011	2782012	10	-	chromosome_13	five_prime_UTR	2799234	2799787	+	ID=Cre13.g582950.t1.2.v5.5.five_prime_UTR.1;Parent=Cre13.g582950.t1.2.v5.5;pacid=30784039	-17222
chromosome_scaffold_23	315	316	19	-	chromosome_scaffold_23	five_prime_UTR	17466	17536	+	ID=Cre23.g754347.t1.1.v5.5.five_prime_UTR.1;Parent=Cre23.g754347.t1.1.v5.5;pacid=30774213	-17150
chromosome_scaffold_23	316	317	30	-	chromosome_scaffold_23	five_prime_UTR	17466	17536	+	ID=Cre23.g754347.t1.1.v5.5.five_prime_UTR.1;Parent=Cre23.g754347.t1.1.v5.5;pacid=30774213	-17149
chromosome_scaffold_23	353	354	57	-	chromosome_scaffold_23	five_prime_UTR	17466	17536	+	ID=Cre23.g754347.t1.1.v5.5.five_prime_UTR.1;Parent=Cre23.g754347.t1.1.v5.5;pacid=30774213	-17112
chromosome_scaffold_23	354	355	55	-	chromosome_scaffold_23	five_prime_UTR	17466	17536	+	ID=Cre23.g754347.t1.1.v5.5.five_prime_UTR.1;Parent=Cre23.g754347.t1.1.v5.5;pacid=30774213	-17111
chromosome_6	630278	630279	13	+	chromosome_6	five_prime_UTR	613132	613188	-	ID=Cre06.g253404.t1.1.v5.5.five_prime_UTR.1;Parent=Cre06.g253404.t1.1.v5.5;pacid=30779652	-17091
chromosome_6	630277	630278	11	+	chromosome_6	five_prime_UTR	613132	613188	-	ID=Cre06.g253404.t1.1.v5.5.five_prime_UTR.1;Parent=Cre06.g253404.t1.1.v5.5;pacid=30779652	-17090
chromosome_6	630276	630277	29	+	chromosome_6	five_prime_UTR	613132	613188	-	ID=Cre06.g253404.t1.1.v5.5.five_prime_UTR.1;Parent=Cre06.g253404.t1.1.v5.5;pacid=30779652	-17089
chromosome_6	630275	630276	39	+	chromosome_6	five_prime_UTR	613132	613188	-	ID=Cre06.g253404.t1.1.v5.5.five_prime_UTR.1;Parent=Cre06.g253404.t1.1.v5.5;pacid=30779652	-17088
chromosome_6	630274	630275	57	+	chromosome_6	five_prime_UTR	613132	613188	-	ID=Cre06.g253404.t1.1.v5.5.five_prime_UTR.1;Parent=Cre06.g253404.t1.1.v5.5;pacid=30779652	-17087
chromosome_scaffold_23	380	381	32	-	chromosome_scaffold_23	five_prime_UTR	17466	17536	+	ID=Cre23.g754347.t1.1.v5.5.five_prime_UTR.1;Parent=Cre23.g754347.t1.1.v5.5;pacid=30774213	-17085
chromosome_scaffold_23	381	382	33	-	chromosome_scaffold_23	five_prime_UTR	17466	17536	+	ID=Cre23.g754347.t1.1.v5.5.five_prime_UTR.1;Parent=Cre23.g754347.t1.1.v5.5;pacid=30774213	-17084
chromosome_9	5078522	5078523	53	-	chromosome_9	five_prime_UTR	5095406	5095734	+	ID=Cre09.g398623.t1.1.v5.5.five_prime_UTR.1;Parent=Cre09.g398623.t1.1.v5.5;pacid=30781085	-16883
chromosome_scaffold_23	670	671	14	-	chromosome_scaffold_23	five_prime_UTR	17466	17536	+	ID=Cre23.g754347.t1.1.v5.5.five_prime_UTR.1;Parent=Cre23.g754347.t1.1.v5.5;pacid=30774213	-16795
chromosome_scaffold_23	672	673	55	-	chromosome_scaffold_23	five_prime_UTR	17466	17536	+	ID=Cre23.g754347.t1.1.v5.5.five_prime_UTR.1;Parent=Cre23.g754347.t1.1.v5.5;pacid=30774213	-16793
chromosome_scaffold_23	674	675	83	-	chromosome_scaffold_23	five_prime_UTR	17466	17536	+	ID=Cre23.g754347.t1.1.v5.5.five_prime_UTR.1;Parent=Cre23.g754347.t1.1.v5.5;pacid=30774213	-16791
chromosome_scaffold_23	675	676	17	-	chromosome_scaffold_23	five_prime_UTR	17466	17536	+	ID=Cre23.g754347.t1.1.v5.5.five_prime_UTR.1;Parent=Cre23.g754347.t1.1.v5.5;pacid=30774213	-16790
chromosome_scaffold_23	676	677	24	-	chromosome_scaffold_23	five_prime_UTR	17466	17536	+	ID=Cre23.g754347.t1.1.v5.5.five_prime_UTR.1;Parent=Cre23.g754347.t1.1.v5.5;pacid=30774213	-16789
chromosome_10	5676960	5676961	19	-	chromosome_10	five_prime_UTR	5693581	5693755	+	ID=Cre10.g460650.t1.2.v5.5.five_prime_UTR.1;Parent=Cre10.g460650.t1.2.v5.5;pacid=30790909	-16620
chromosome_1	2253	2254	23	-	chromosome_1	five_prime_UTR	18766	19162	+	ID=Cre01.g000017.t1.1.v5.5.five_prime_UTR.1;Parent=Cre01.g000017.t1.1.v5.5;pacid=30789166	-16512
chromosome_1	1067967	1067968	16	+	chromosome_1	five_prime_UTR	1051328	1051485	-	ID=Cre01.g006100.t1.2.v5.5.five_prime_UTR.1;Parent=Cre01.g006100.t1.2.v5.5;pacid=30789633	-16483
chromosome_4	921806	921807	34	-	chromosome_4	five_prime_UTR	938033	938087	+	ID=Cre04.g217985.t1.1.v5.5.five_prime_UTR.1;Parent=Cre04.g217985.t1.1.v5.5;pacid=30791497	-16226
chromosome_4	921807	921808	59	-	chromosome_4	five_prime_UTR	938033	938087	+	ID=Cre04.g217985.t1.1.v5.5.five_prime_UTR.1;Parent=Cre04.g217985.t1.1.v5.5;pacid=30791497	-16225
chromosome_4	921808	921809	73	-	chromosome_4	five_prime_UTR	938033	938087	+	ID=Cre04.g217985.t1.1.v5.5.five_prime_UTR.1;Parent=Cre04.g217985.t1.1.v5.5;pacid=30791497	-16224
chromosome_4	921809	921810	12	-	chromosome_4	five_prime_UTR	938033	938087	+	ID=Cre04.g217985.t1.1.v5.5.five_prime_UTR.1;Parent=Cre04.g217985.t1.1.v5.5;pacid=30791497	-16223
chromosome_4	921810	921811	17	-	chromosome_4	five_prime_UTR	938033	938087	+	ID=Cre04.g217985.t1.1.v5.5.five_prime_UTR.1;Parent=Cre04.g217985.t1.1.v5.5;pacid=30791497	-16222
chromosome_8	2702858	2702859	16	+	chromosome_8	five_prime_UTR	2686708	2686965	-	ID=Cre08.g373225.t1.1.v5.5.five_prime_UTR.1;Parent=Cre08.g373225.t1.1.v5.5;pacid=30773823	-15894
chromosome_7	2521729	2521730	64	-	chromosome_7	five_prime_UTR	2537244	2537504	+	ID=Cre07.g329767.t1.1.v5.5.five_prime_UTR.1;Parent=Cre07.g329767.t1.1.v5.5;pacid=30774354	-15514
chromosome_7	2521730	2521731	30	-	chromosome_7	five_prime_UTR	2537244	2537504	+	ID=Cre07.g329767.t1.1.v5.5.five_prime_UTR.1;Parent=Cre07.g329767.t1.1.v5.5;pacid=30774354	-15513
chromosome_7	2521731	2521732	98	-	chromosome_7	five_prime_UTR	2537244	2537504	+	ID=Cre07.g329767.t1.1.v5.5.five_prime_UTR.1;Parent=Cre07.g329767.t1.1.v5.5;pacid=30774354	-15512
chromosome_7	2521735	2521736	10	-	chromosome_7	five_prime_UTR	2537244	2537504	+	ID=Cre07.g329767.t1.1.v5.5.five_prime_UTR.1;Parent=Cre07.g329767.t1.1.v5.5;pacid=30774354	-15508
chromosome_9	5080305	5080306	65	-	chromosome_9	five_prime_UTR	5095406	5095734	+	ID=Cre09.g398623.t1.1.v5.5.five_prime_UTR.1;Parent=Cre09.g398623.t1.1.v5.5;pacid=30781085	-15100
chromosome_9	1111013	1111014	47	+	chromosome_9	five_prime_UTR	1095851	1095985	-	ID=Cre09.g400450.t1.1.v5.5.five_prime_UTR.1;Parent=Cre09.g400450.t1.1.v5.5;pacid=30781446	-15029
chromosome_9	1111012	1111013	46	+	chromosome_9	five_prime_UTR	1095851	1095985	-	ID=Cre09.g400450.t1.1.v5.5.five_prime_UTR.1;Parent=Cre09.g400450.t1.1.v5.5;pacid=30781446	-15028
chromosome_9	1111011	1111012	21	+	chromosome_9	five_prime_UTR	1095851	1095985	-	ID=Cre09.g400450.t1.1.v5.5.five_prime_UTR.1;Parent=Cre09.g400450.t1.1.v5.5;pacid=30781446	-15027
chromosome_9	1111010	1111011	50	+	chromosome_9	five_prime_UTR	1095851	1095985	-	ID=Cre09.g400450.t1.1.v5.5.five_prime_UTR.1;Parent=Cre09.g400450.t1.1.v5.5;pacid=30781446	-15026
chromosome_9	1111009	1111010	15	+	chromosome_9	five_prime_UTR	1095851	1095985	-	ID=Cre09.g400450.t1.1.v5.5.five_prime_UTR.1;Parent=Cre09.g400450.t1.1.v5.5;pacid=30781446	-15025
chromosome_1	2907120	2907121	50	-	chromosome_1	five_prime_UTR	2922057	2922261	+	ID=Cre01.g017750.t1.1.v5.5.five_prime_UTR.1;Parent=Cre01.g017750.t1.1.v5.5;pacid=30788953	-14936
chromosome_1	2907121	2907122	33	-	chromosome_1	five_prime_UTR	2922057	2922261	+	ID=Cre01.g017750.t1.1.v5.5.five_prime_UTR.1;Parent=Cre01.g017750.t1.1.v5.5;pacid=30788953	-14935
chromosome_1	2907122	2907123	15	-	chromosome_1	five_prime_UTR	2922057	2922261	+	ID=Cre01.g017750.t1.1.v5.5.five_prime_UTR.1;Parent=Cre01.g017750.t1.1.v5.5;pacid=30788953	-14934
chromosome_1	2907123	2907124	49	-	chromosome_1	five_prime_UTR	2922057	2922261	+	ID=Cre01.g017750.t1.1.v5.5.five_prime_UTR.1;Parent=Cre01.g017750.t1.1.v5.5;pacid=30788953	-14933
chromosome_5	2274478	2274479	14	+	chromosome_5	five_prime_UTR	2259475	2259590	-	ID=Cre05.g234664.t1.1.v5.5.five_prime_UTR.1;Parent=Cre05.g234664.t1.1.v5.5;pacid=30783327	-14889
chromosome_5	2274476	2274477	14	+	chromosome_5	five_prime_UTR	2259475	2259590	-	ID=Cre05.g234664.t1.1.v5.5.five_prime_UTR.1;Parent=Cre05.g234664.t1.1.v5.5;pacid=30783327	-14887
chromosome_2	3707106	3707107	54	+	chromosome_2	five_prime_UTR	3692319	3692451	-	ID=Cre02.g095000.t1.2.v5.5.five_prime_UTR.1;Parent=Cre02.g095000.t1.2.v5.5;pacid=30785376	-14656
chromosome_16	5706556	5706557	14	+	chromosome_16	five_prime_UTR	5692267	5692420	-	ID=Cre16.g679050.t1.2.v5.5.five_prime_UTR.1;Parent=Cre16.g679050.t1.2.v5.5;pacid=30776865	-14137
chromosome_16	5706551	5706552	26	+	chromosome_16	five_prime_UTR	5692267	5692420	-	ID=Cre16.g679050.t1.2.v5.5.five_prime_UTR.1;Parent=Cre16.g679050.t1.2.v5.5;pacid=30776865	-14132
chromosome_16	5706549	5706550	60	+	chromosome_16	five_prime_UTR	5692267	5692420	-	ID=Cre16.g679050.t1.2.v5.5.five_prime_UTR.1;Parent=Cre16.g679050.t1.2.v5.5;pacid=30776865	-14130
chromosome_7	6228400	6228401	46	-	chromosome_7	five_prime_UTR	6242303	6242621	+	ID=Cre07.g356550.t1.1.v5.5.five_prime_UTR.1;Parent=Cre07.g356550.t1.1.v5.5;pacid=30774239	-13902
chromosome_4	1060965	1060966	82	-	chromosome_4	five_prime_UTR	1074728	1074830	+	ID=Cre04.g216300.t1.2.v5.5.five_prime_UTR.1;Parent=Cre04.g216300.t1.2.v5.5;pacid=30791377	-13762
chromosome_6	8351486	8351487	39	+	chromosome_6	five_prime_UTR	8337853	8337913	-	ID=Cre06.g306300.t1.2.v5.5.five_prime_UTR.1;Parent=Cre06.g306300.t1.2.v5.5;pacid=30778583	-13574
chromosome_8	3090108	3090109	12	+	chromosome_8	five_prime_UTR	3076124	3076665	-	ID=Cre08.g373372.t1.1.v5.5.five_prime_UTR.1;Parent=Cre08.g373372.t1.1.v5.5;pacid=30774015	-13444
chromosome_8	3090073	3090074	24	+	chromosome_8	five_prime_UTR	3076124	3076665	-	ID=Cre08.g373372.t1.1.v5.5.five_prime_UTR.1;Parent=Cre08.g373372.t1.1.v5.5;pacid=30774015	-13409
chromosome_8	3090072	3090073	36	+	chromosome_8	five_prime_UTR	3076124	3076665	-	ID=Cre08.g373372.t1.1.v5.5.five_prime_UTR.1;Parent=Cre08.g373372.t1.1.v5.5;pacid=30774015	-13408
chromosome_8	3090071	3090072	31	+	chromosome_8	five_prime_UTR	3076124	3076665	-	ID=Cre08.g373372.t1.1.v5.5.five_prime_UTR.1;Parent=Cre08.g373372.t1.1.v5.5;pacid=30774015	-13407
chromosome_8	3090070	3090071	57	+	chromosome_8	five_prime_UTR	3076124	3076665	-	ID=Cre08.g373372.t1.1.v5.5.five_prime_UTR.1;Parent=Cre08.g373372.t1.1.v5.5;pacid=30774015	-13406
chromosome_8	3090069	3090070	36	+	chromosome_8	five_prime_UTR	3076124	3076665	-	ID=Cre08.g373372.t1.1.v5.5.five_prime_UTR.1;Parent=Cre08.g373372.t1.1.v5.5;pacid=30774015	-13405
chromosome_8	3090068	3090069	22	+	chromosome_8	five_prime_UTR	3076124	3076665	-	ID=Cre08.g373372.t1.1.v5.5.five_prime_UTR.1;Parent=Cre08.g373372.t1.1.v5.5;pacid=30774015	-13404
chromosome_8	3090067	3090068	121	+	chromosome_8	five_prime_UTR	3076124	3076665	-	ID=Cre08.g373372.t1.1.v5.5.five_prime_UTR.1;Parent=Cre08.g373372.t1.1.v5.5;pacid=30774015	-13403
chromosome_8	3090066	3090067	26	+	chromosome_8	five_prime_UTR	3076124	3076665	-	ID=Cre08.g373372.t1.1.v5.5.five_prime_UTR.1;Parent=Cre08.g373372.t1.1.v5.5;pacid=30774015	-13402
chromosome_8	3090065	3090066	15	+	chromosome_8	five_prime_UTR	3076124	3076665	-	ID=Cre08.g373372.t1.1.v5.5.five_prime_UTR.1;Parent=Cre08.g373372.t1.1.v5.5;pacid=30774015	-13401
chromosome_8	3090064	3090065	14	+	chromosome_8	five_prime_UTR	3076124	3076665	-	ID=Cre08.g373372.t1.1.v5.5.five_prime_UTR.1;Parent=Cre08.g373372.t1.1.v5.5;pacid=30774015	-13400
chromosome_4	909745	909746	10	+	chromosome_4	five_prime_UTR	895644	896422	-	ID=Cre04.g217983.t1.1.v5.5.five_prime_UTR.1;Parent=Cre04.g217983.t1.1.v5.5;pacid=30791606	-13324
chromosome_4	909744	909745	18	+	chromosome_4	five_prime_UTR	895644	896422	-	ID=Cre04.g217983.t1.1.v5.5.five_prime_UTR.1;Parent=Cre04.g217983.t1.1.v5.5;pacid=30791606	-13323
chromosome_4	909743	909744	13	+	chromosome_4	five_prime_UTR	895644	896422	-	ID=Cre04.g217983.t1.1.v5.5.five_prime_UTR.1;Parent=Cre04.g217983.t1.1.v5.5;pacid=30791606	-13322
chromosome_4	909742	909743	26	+	chromosome_4	five_prime_UTR	895644	896422	-	ID=Cre04.g217983.t1.1.v5.5.five_prime_UTR.1;Parent=Cre04.g217983.t1.1.v5.5;pacid=30791606	-13321
chromosome_12	3980671	3980672	26	-	chromosome_12	five_prime_UTR	3993874	3994139	+	ID=Cre12.g516800.t1.1.v5.5.five_prime_UTR.1;Parent=Cre12.g516800.t1.1.v5.5;pacid=30793040	-13202
chromosome_11	618318	618319	10	-	chromosome_11	five_prime_UTR	631156	631214	+	ID=Cre11.g467615.t1.1.v5.5.five_prime_UTR.1;Parent=Cre11.g467615.t1.1.v5.5;pacid=30775563	-12837
chromosome_11	618331	618332	10	-	chromosome_11	five_prime_UTR	631156	631214	+	ID=Cre11.g467615.t1.1.v5.5.five_prime_UTR.1;Parent=Cre11.g467615.t1.1.v5.5;pacid=30775563	-12824
chromosome_11	618334	618335	11	-	chromosome_11	five_prime_UTR	631156	631214	+	ID=Cre11.g467615.t1.1.v5.5.five_prime_UTR.1;Parent=Cre11.g467615.t1.1.v5.5;pacid=30775563	-12821
chromosome_11	618335	618336	24	-	chromosome_11	five_prime_UTR	631156	631214	+	ID=Cre11.g467615.t1.1.v5.5.five_prime_UTR.1;Parent=Cre11.g467615.t1.1.v5.5;pacid=30775563	-12820
chromosome_11	618336	618337	31	-	chromosome_11	five_prime_UTR	631156	631214	+	ID=Cre11.g467615.t1.1.v5.5.five_prime_UTR.1;Parent=Cre11.g467615.t1.1.v5.5;pacid=30775563	-12819
chromosome_4	908436	908437	17	+	chromosome_4	five_prime_UTR	895644	896422	-	ID=Cre04.g217983.t1.1.v5.5.five_prime_UTR.1;Parent=Cre04.g217983.t1.1.v5.5;pacid=30791606	-12015
chromosome_4	908435	908436	25	+	chromosome_4	five_prime_UTR	895644	896422	-	ID=Cre04.g217983.t1.1.v5.5.five_prime_UTR.1;Parent=Cre04.g217983.t1.1.v5.5;pacid=30791606	-12014
chromosome_6	4551661	4551662	18	+	chromosome_6	five_prime_UTR	4539497	4539699	-	ID=Cre06.g278282.t1.1.v5.5.five_prime_UTR.1;Parent=Cre06.g278282.t1.1.v5.5;pacid=30779861	-11963
chromosome_6	4551660	4551661	18	+	chromosome_6	five_prime_UTR	4539497	4539699	-	ID=Cre06.g278282.t1.1.v5.5.five_prime_UTR.1;Parent=Cre06.g278282.t1.1.v5.5;pacid=30779861	-11962
chromosome_6	4551659	4551660	32	+	chromosome_6	five_prime_UTR	4539497	4539699	-	ID=Cre06.g278282.t1.1.v5.5.five_prime_UTR.1;Parent=Cre06.g278282.t1.1.v5.5;pacid=30779861	-11961
chromosome_2	9040015	9040016	56	-	chromosome_2	five_prime_UTR	9051906	9052313	+	ID=Cre02.g143207.t1.1.v5.5.five_prime_UTR.1;Parent=Cre02.g143207.t1.1.v5.5;pacid=30785232	-11890
chromosome_2	2999118	2999119	16	-	chromosome_2	five_prime_UTR	3010946	3011069	+	ID=Cre02.g095042.t1.1.v5.5.five_prime_UTR.1;Parent=Cre02.g095042.t1.1.v5.5;pacid=30786039	-11827
chromosome_14	2145660	2145661	10	-	chromosome_14	five_prime_UTR	2157126	2157233	+	ID=Cre14.g622480.t1.1.v5.5.five_prime_UTR.1;Parent=Cre14.g622480.t1.1.v5.5;pacid=30776393	-11465
chromosome_14	2145661	2145662	50	-	chromosome_14	five_prime_UTR	2157126	2157233	+	ID=Cre14.g622480.t1.1.v5.5.five_prime_UTR.1;Parent=Cre14.g622480.t1.1.v5.5;pacid=30776393	-11464
chromosome_14	2145662	2145663	320	-	chromosome_14	five_prime_UTR	2157126	2157233	+	ID=Cre14.g622480.t1.1.v5.5.five_prime_UTR.1;Parent=Cre14.g622480.t1.1.v5.5;pacid=30776393	-11463
chromosome_4	2923720	2923721	61	-	chromosome_4	five_prime_UTR	2935173	2935432	+	ID=Cre04.g224667.t1.1.v5.5.five_prime_UTR.1;Parent=Cre04.g224667.t1.1.v5.5;pacid=30791281	-11452
chromosome_4	2923722	2923723	22	-	chromosome_4	five_prime_UTR	2935173	2935432	+	ID=Cre04.g224667.t1.1.v5.5.five_prime_UTR.1;Parent=Cre04.g224667.t1.1.v5.5;pacid=30791281	-11450
chromosome_2	6164112	6164113	10	-	chromosome_2	five_prime_UTR	6175485	6175623	+	ID=Cre02.g113750.t1.1.v5.5.five_prime_UTR.1;Parent=Cre02.g113750.t1.1.v5.5;pacid=30786350	-11372
chromosome_2	4013741	4013742	23	+	chromosome_2	five_prime_UTR	4002434	4002545	-	ID=Cre02.g096950.t1.2.v5.5.five_prime_UTR.1;Parent=Cre02.g096950.t1.2.v5.5;pacid=30786469	-11197
chromosome_16	7611895	7611896	11	-	chromosome_16	five_prime_UTR	7622846	7622989	+	ID=Cre16.g689647.t1.1.v5.5.five_prime_UTR.1;Parent=Cre16.g689647.t1.1.v5.5;pacid=30777587	-10950
chromosome_16	7611897	7611898	15	-	chromosome_16	five_prime_UTR	7622846	7622989	+	ID=Cre16.g689647.t1.1.v5.5.five_prime_UTR.1;Parent=Cre16.g689647.t1.1.v5.5;pacid=30777587	-10948
chromosome_10	998702	998703	22	+	chromosome_10	five_prime_UTR	988018	988221	-	ID=Cre10.g424850.t1.2.v5.5.five_prime_UTR.1;Parent=Cre10.g424850.t1.2.v5.5;pacid=30790537	-10482
chromosome_10	998698	998699	14	+	chromosome_10	five_prime_UTR	988018	988221	-	ID=Cre10.g424850.t1.2.v5.5.five_prime_UTR.1;Parent=Cre10.g424850.t1.2.v5.5;pacid=30790537	-10478
chromosome_2	4537753	4537754	13	+	chromosome_2	five_prime_UTR	4527256	4527510	-	ID=Cre02.g100633.t1.1.v5.5.five_prime_UTR.1;Parent=Cre02.g100633.t1.1.v5.5;pacid=30786332	-10244
chromosome_2	4537752	4537753	16	+	chromosome_2	five_prime_UTR	4527256	4527510	-	ID=Cre02.g100633.t1.1.v5.5.five_prime_UTR.1;Parent=Cre02.g100633.t1.1.v5.5;pacid=30786332	-10243
chromosome_2	4537751	4537752	22	+	chromosome_2	five_prime_UTR	4527256	4527510	-	ID=Cre02.g100633.t1.1.v5.5.five_prime_UTR.1;Parent=Cre02.g100633.t1.1.v5.5;pacid=30786332	-10242
chromosome_2	4537750	4537751	30	+	chromosome_2	five_prime_UTR	4527256	4527510	-	ID=Cre02.g100633.t1.1.v5.5.five_prime_UTR.1;Parent=Cre02.g100633.t1.1.v5.5;pacid=30786332	-10241
chromosome_2	4537749	4537750	31	+	chromosome_2	five_prime_UTR	4527256	4527510	-	ID=Cre02.g100633.t1.1.v5.5.five_prime_UTR.1;Parent=Cre02.g100633.t1.1.v5.5;pacid=30786332	-10240
chromosome_2	4537748	4537749	45	+	chromosome_2	five_prime_UTR	4527256	4527510	-	ID=Cre02.g100633.t1.1.v5.5.five_prime_UTR.1;Parent=Cre02.g100633.t1.1.v5.5;pacid=30786332	-10239
chromosome_2	4537747	4537748	62	+	chromosome_2	five_prime_UTR	4527256	4527510	-	ID=Cre02.g100633.t1.1.v5.5.five_prime_UTR.1;Parent=Cre02.g100633.t1.1.v5.5;pacid=30786332	-10238
chromosome_2	4537746	4537747	82	+	chromosome_2	five_prime_UTR	4527256	4527510	-	ID=Cre02.g100633.t1.1.v5.5.five_prime_UTR.1;Parent=Cre02.g100633.t1.1.v5.5;pacid=30786332	-10237
chromosome_2	4537745	4537746	67	+	chromosome_2	five_prime_UTR	4527256	4527510	-	ID=Cre02.g100633.t1.1.v5.5.five_prime_UTR.1;Parent=Cre02.g100633.t1.1.v5.5;pacid=30786332	-10236
chromosome_2	4537744	4537745	87	+	chromosome_2	five_prime_UTR	4527256	4527510	-	ID=Cre02.g100633.t1.1.v5.5.five_prime_UTR.1;Parent=Cre02.g100633.t1.1.v5.5;pacid=30786332	-10235
chromosome_12	6839393	6839394	16	+	chromosome_12	five_prime_UTR	6828956	6829262	-	ID=Cre12.g561300.t1.1.v5.5.five_prime_UTR.1;Parent=Cre12.g561300.t1.1.v5.5;pacid=30792769	-10132
chromosome_2	8773067	8773068	13	-	chromosome_2	five_prime_UTR	8783189	8783280	+	ID=Cre02.g142406.t1.1.v5.5.five_prime_UTR.1;Parent=Cre02.g142406.t1.1.v5.5;pacid=30786365	-10121
chromosome_2	2987229	2987230	36	+	chromosome_2	five_prime_UTR	2977104	2977244	-	ID=Cre02.g095040.t1.1.v5.5.five_prime_UTR.1;Parent=Cre02.g095040.t1.1.v5.5;pacid=30785339	-9986
chromosome_2	2987226	2987227	17	+	chromosome_2	five_prime_UTR	2977104	2977244	-	ID=Cre02.g095040.t1.1.v5.5.five_prime_UTR.1;Parent=Cre02.g095040.t1.1.v5.5;pacid=30785339	-9983
chromosome_2	2987224	2987225	83	+	chromosome_2	five_prime_UTR	2977104	2977244	-	ID=Cre02.g095040.t1.1.v5.5.five_prime_UTR.1;Parent=Cre02.g095040.t1.1.v5.5;pacid=30785339	-9981
chromosome_2	2987223	2987224	29	+	chromosome_2	five_prime_UTR	2977104	2977244	-	ID=Cre02.g095040.t1.1.v5.5.five_prime_UTR.1;Parent=Cre02.g095040.t1.1.v5.5;pacid=30785339	-9980
chromosome_2	2987222	2987223	288	+	chromosome_2	five_prime_UTR	2977104	2977244	-	ID=Cre02.g095040.t1.1.v5.5.five_prime_UTR.1;Parent=Cre02.g095040.t1.1.v5.5;pacid=30785339	-9979
chromosome_2	2987221	2987222	25	+	chromosome_2	five_prime_UTR	2977104	2977244	-	ID=Cre02.g095040.t1.1.v5.5.five_prime_UTR.1;Parent=Cre02.g095040.t1.1.v5.5;pacid=30785339	-9978
chromosome_5	3114694	3114695	15	+	chromosome_5	five_prime_UTR	3104479	3104845	-	ID=Cre05.g239083.t1.1.v5.5.five_prime_UTR.1;Parent=Cre05.g239083.t1.1.v5.5;pacid=30783187	-9850
chromosome_scaffold_31	2207	2208	10	-	chromosome_scaffold_31	five_prime_UTR	11726	11870	+	ID=Cre31.g758447.t1.1.v5.5.five_prime_UTR.1;Parent=Cre31.g758447.t1.1.v5.5;pacid=30781569	-9518
chromosome_scaffold_23	8030	8031	10	-	chromosome_scaffold_23	five_prime_UTR	17466	17536	+	ID=Cre23.g754347.t1.1.v5.5.five_prime_UTR.1;Parent=Cre23.g754347.t1.1.v5.5;pacid=30774213	-9435
chromosome_scaffold_23	8032	8033	12	-	chromosome_scaffold_23	five_prime_UTR	17466	17536	+	ID=Cre23.g754347.t1.1.v5.5.five_prime_UTR.1;Parent=Cre23.g754347.t1.1.v5.5;pacid=30774213	-9433
chromosome_scaffold_23	8033	8034	22	-	chromosome_scaffold_23	five_prime_UTR	17466	17536	+	ID=Cre23.g754347.t1.1.v5.5.five_prime_UTR.1;Parent=Cre23.g754347.t1.1.v5.5;pacid=30774213	-9432
chromosome_scaffold_23	8034	8035	23	-	chromosome_scaffold_23	five_prime_UTR	17466	17536	+	ID=Cre23.g754347.t1.1.v5.5.five_prime_UTR.1;Parent=Cre23.g754347.t1.1.v5.5;pacid=30774213	-9431
chromosome_scaffold_23	8071	8072	58	-	chromosome_scaffold_23	five_prime_UTR	17466	17536	+	ID=Cre23.g754347.t1.1.v5.5.five_prime_UTR.1;Parent=Cre23.g754347.t1.1.v5.5;pacid=30774213	-9394
chromosome_scaffold_23	8072	8073	43	-	chromosome_scaffold_23	five_prime_UTR	17466	17536	+	ID=Cre23.g754347.t1.1.v5.5.five_prime_UTR.1;Parent=Cre23.g754347.t1.1.v5.5;pacid=30774213	-9393
chromosome_scaffold_23	8098	8099	33	-	chromosome_scaffold_23	five_prime_UTR	17466	17536	+	ID=Cre23.g754347.t1.1.v5.5.five_prime_UTR.1;Parent=Cre23.g754347.t1.1.v5.5;pacid=30774213	-9367
chromosome_scaffold_23	8099	8100	27	-	chromosome_scaffold_23	five_prime_UTR	17466	17536	+	ID=Cre23.g754347.t1.1.v5.5.five_prime_UTR.1;Parent=Cre23.g754347.t1.1.v5.5;pacid=30774213	-9366
chromosome_scaffold_23	8232	8233	16	-	chromosome_scaffold_23	five_prime_UTR	17466	17536	+	ID=Cre23.g754347.t1.1.v5.5.five_prime_UTR.1;Parent=Cre23.g754347.t1.1.v5.5;pacid=30774213	-9233
chromosome_scaffold_23	8388	8389	12	-	chromosome_scaffold_23	five_prime_UTR	17466	17536	+	ID=Cre23.g754347.t1.1.v5.5.five_prime_UTR.1;Parent=Cre23.g754347.t1.1.v5.5;pacid=30774213	-9077
chromosome_12	3984798	3984799	11	-	chromosome_12	five_prime_UTR	3993874	3994139	+	ID=Cre12.g516800.t1.1.v5.5.five_prime_UTR.1;Parent=Cre12.g516800.t1.1.v5.5;pacid=30793040	-9075
chromosome_scaffold_23	8390	8391	54	-	chromosome_scaffold_23	five_prime_UTR	17466	17536	+	ID=Cre23.g754347.t1.1.v5.5.five_prime_UTR.1;Parent=Cre23.g754347.t1.1.v5.5;pacid=30774213	-9075
chromosome_12	3984799	3984800	20	-	chromosome_12	five_prime_UTR	3993874	3994139	+	ID=Cre12.g516800.t1.1.v5.5.five_prime_UTR.1;Parent=Cre12.g516800.t1.1.v5.5;pacid=30793040	-9074
chromosome_scaffold_23	8392	8393	79	-	chromosome_scaffold_23	five_prime_UTR	17466	17536	+	ID=Cre23.g754347.t1.1.v5.5.five_prime_UTR.1;Parent=Cre23.g754347.t1.1.v5.5;pacid=30774213	-9073
chromosome_scaffold_23	8393	8394	19	-	chromosome_scaffold_23	five_prime_UTR	17466	17536	+	ID=Cre23.g754347.t1.1.v5.5.five_prime_UTR.1;Parent=Cre23.g754347.t1.1.v5.5;pacid=30774213	-9072
chromosome_scaffold_23	8394	8395	22	-	chromosome_scaffold_23	five_prime_UTR	17466	17536	+	ID=Cre23.g754347.t1.1.v5.5.five_prime_UTR.1;Parent=Cre23.g754347.t1.1.v5.5;pacid=30774213	-9071
chromosome_8	3151672	3151673	10	-	chromosome_8	five_prime_UTR	3160366	3160557	+	ID=Cre08.g373407.t1.1.v5.5.five_prime_UTR.1;Parent=Cre08.g373407.t1.1.v5.5;pacid=30773630	-8693
chromosome_8	684044	684045	47	+	chromosome_8	five_prime_UTR	674687	675382	-	ID=Cre08.g360050.t1.1.v5.5.five_prime_UTR.1;Parent=Cre08.g360050.t1.1.v5.5;pacid=30773809	-8663
chromosome_8	684043	684044	65	+	chromosome_8	five_prime_UTR	674687	675382	-	ID=Cre08.g360050.t1.1.v5.5.five_prime_UTR.1;Parent=Cre08.g360050.t1.1.v5.5;pacid=30773809	-8662
chromosome_14	2000840	2000841	13	+	chromosome_14	five_prime_UTR	1992142	1992274	-	ID=Cre14.g621400.t1.1.v5.5.five_prime_UTR.1;Parent=Cre14.g621400.t1.1.v5.5;pacid=30776700	-8567
chromosome_14	2000839	2000840	20	+	chromosome_14	five_prime_UTR	1992142	1992274	-	ID=Cre14.g621400.t1.1.v5.5.five_prime_UTR.1;Parent=Cre14.g621400.t1.1.v5.5;pacid=30776700	-8566
chromosome_14	2000838	2000839	153	+	chromosome_14	five_prime_UTR	1992142	1992274	-	ID=Cre14.g621400.t1.1.v5.5.five_prime_UTR.1;Parent=Cre14.g621400.t1.1.v5.5;pacid=30776700	-8565
chromosome_14	2000837	2000838	742	+	chromosome_14	five_prime_UTR	1992142	1992274	-	ID=Cre14.g621400.t1.1.v5.5.five_prime_UTR.1;Parent=Cre14.g621400.t1.1.v5.5;pacid=30776700	-8564
chromosome_14	2000836	2000837	1662	+	chromosome_14	five_prime_UTR	1992142	1992274	-	ID=Cre14.g621400.t1.1.v5.5.five_prime_UTR.1;Parent=Cre14.g621400.t1.1.v5.5;pacid=30776700	-8563
chromosome_14	2000835	2000836	48	+	chromosome_14	five_prime_UTR	1992142	1992274	-	ID=Cre14.g621400.t1.1.v5.5.five_prime_UTR.1;Parent=Cre14.g621400.t1.1.v5.5;pacid=30776700	-8562
chromosome_14	2000834	2000835	736	+	chromosome_14	five_prime_UTR	1992142	1992274	-	ID=Cre14.g621400.t1.1.v5.5.five_prime_UTR.1;Parent=Cre14.g621400.t1.1.v5.5;pacid=30776700	-8561
chromosome_14	2000833	2000834	41	+	chromosome_14	five_prime_UTR	1992142	1992274	-	ID=Cre14.g621400.t1.1.v5.5.five_prime_UTR.1;Parent=Cre14.g621400.t1.1.v5.5;pacid=30776700	-8560
chromosome_14	2000832	2000833	32	+	chromosome_14	five_prime_UTR	1992142	1992274	-	ID=Cre14.g621400.t1.1.v5.5.five_prime_UTR.1;Parent=Cre14.g621400.t1.1.v5.5;pacid=30776700	-8559
chromosome_14	2000815	2000816	10	+	chromosome_14	five_prime_UTR	1992142	1992274	-	ID=Cre14.g621400.t1.1.v5.5.five_prime_UTR.1;Parent=Cre14.g621400.t1.1.v5.5;pacid=30776700	-8542
chromosome_14	2000797	2000798	17	+	chromosome_14	five_prime_UTR	1992142	1992274	-	ID=Cre14.g621400.t1.1.v5.5.five_prime_UTR.1;Parent=Cre14.g621400.t1.1.v5.5;pacid=30776700	-8524
chromosome_16	1117855	1117856	24	-	chromosome_16	five_prime_UTR	1126366	1126506	+	ID=Cre16.g649950.t1.2.v5.5.five_prime_UTR.1;Parent=Cre16.g649950.t1.2.v5.5;pacid=30777380	-8510
chromosome_16	1117857	1117858	20	-	chromosome_16	five_prime_UTR	1126366	1126506	+	ID=Cre16.g649950.t1.2.v5.5.five_prime_UTR.1;Parent=Cre16.g649950.t1.2.v5.5;pacid=30777380	-8508
chromosome_13	2486095	2486096	10	+	chromosome_13	five_prime_UTR	2477587	2477724	-	ID=Cre13.g580050.t1.2.v5.5.five_prime_UTR.1;Parent=Cre13.g580050.t1.2.v5.5;pacid=30784225	-8372
chromosome_5	2366461	2366462	19	+	chromosome_5	five_prime_UTR	2358091	2358119	-	ID=Cre05.g235060.t1.1.v5.5.five_prime_UTR.1;Parent=Cre05.g235060.t1.1.v5.5;pacid=30783124	-8343
chromosome_4	2550891	2550892	74	-	chromosome_4	five_prime_UTR	2559193	2559312	+	ID=Cre04.g222450.t1.1.v5.5.five_prime_UTR.1;Parent=Cre04.g222450.t1.1.v5.5;pacid=30791103	-8301
chromosome_4	2550893	2550894	34	-	chromosome_4	five_prime_UTR	2559193	2559312	+	ID=Cre04.g222450.t1.1.v5.5.five_prime_UTR.1;Parent=Cre04.g222450.t1.1.v5.5;pacid=30791103	-8299
chromosome_9	7440353	7440354	13	+	chromosome_9	five_prime_UTR	7431726	7432095	-	ID=Cre09.g413400.t1.1.v5.5.five_prime_UTR.1;Parent=Cre09.g413400.t1.1.v5.5;pacid=30781513	-8259
chromosome_9	578748	578749	12	+	chromosome_9	five_prime_UTR	570395	570503	-	ID=Cre09.g403800.t1.2.v5.5.five_prime_UTR.1;Parent=Cre09.g403800.t1.2.v5.5;pacid=30780908	-8246
chromosome_scaffold_22	16135	16136	10	+	chromosome_scaffold_22	five_prime_UTR	7769	8013	-	ID=Cre22.g753447.t1.1.v5.5.five_prime_UTR.1;Parent=Cre22.g753447.t1.1.v5.5;pacid=30778274	-8123
chromosome_scaffold_22	16134	16135	85	+	chromosome_scaffold_22	five_prime_UTR	7769	8013	-	ID=Cre22.g753447.t1.1.v5.5.five_prime_UTR.1;Parent=Cre22.g753447.t1.1.v5.5;pacid=30778274	-8122
chromosome_12	845455	845456	23	+	chromosome_12	five_prime_UTR	837432	837651	-	ID=Cre12.g495953.t1.1.v5.5.five_prime_UTR.1;Parent=Cre12.g495953.t1.1.v5.5;pacid=30792319	-7805
chromosome_5	2363631	2363632	17	-	chromosome_5	five_prime_UTR	2371420	2371459	+	ID=Cre05.g235102.t1.1.v5.5.five_prime_UTR.1;Parent=Cre05.g235102.t1.1.v5.5;pacid=30783328	-7788
chromosome_9	5424872	5424873	17	+	chromosome_9	five_prime_UTR	5416552	5417107	-	ID=Cre09.g400034.t1.1.v5.5.five_prime_UTR.1;Parent=Cre09.g400034.t1.1.v5.5;pacid=30781393	-7766
chromosome_4	2011661	2011662	15	+	chromosome_4	five_prime_UTR	2003745	2003922	-	ID=Cre04.g218800.t1.1.v5.5.five_prime_UTR.1;Parent=Cre04.g218800.t1.1.v5.5;pacid=30791461	-7740
chromosome_6	8990672	8990673	10	-	chromosome_6	five_prime_UTR	8998356	8998409	+	ID=Cre06.g311800.t1.1.v5.5.five_prime_UTR.1;Parent=Cre06.g311800.t1.1.v5.5;pacid=30778759	-7683
chromosome_6	8990674	8990675	14	-	chromosome_6	five_prime_UTR	8998356	8998409	+	ID=Cre06.g311800.t1.1.v5.5.five_prime_UTR.1;Parent=Cre06.g311800.t1.1.v5.5;pacid=30778759	-7681
chromosome_12	1984967	1984968	10	-	chromosome_12	five_prime_UTR	1992621	1992847	+	ID=Cre12.g510300.t1.1.v5.5.five_prime_UTR.1;Parent=Cre12.g510300.t1.1.v5.5;pacid=30793496	-7653
chromosome_12	201866	201867	10	-	chromosome_12	five_prime_UTR	209380	209408	+	ID=Cre12.g484834.t1.1.v5.5.five_prime_UTR.1;Parent=Cre12.g484834.t1.1.v5.5;pacid=30791817	-7513
chromosome_6	2242554	2242555	10	+	chromosome_6	five_prime_UTR	2234882	2235101	-	ID=Cre06.g266350.t1.1.v5.5.five_prime_UTR.1;Parent=Cre06.g266350.t1.1.v5.5;pacid=30779361	-7454
chromosome_6	2242550	2242551	16	+	chromosome_6	five_prime_UTR	2234882	2235101	-	ID=Cre06.g266350.t1.1.v5.5.five_prime_UTR.1;Parent=Cre06.g266350.t1.1.v5.5;pacid=30779361	-7450
chromosome_10	3494321	3494322	10	+	chromosome_10	five_prime_UTR	3487067	3487172	-	ID=Cre10.g444950.t1.2.v5.5.five_prime_UTR.1;Parent=Cre10.g444950.t1.2.v5.5;pacid=30789755	-7150
chromosome_13	3140890	3140891	29	-	chromosome_13	five_prime_UTR	3147873	3148117	+	ID=Cre13.g585150.t1.2.v5.5.five_prime_UTR.1;Parent=Cre13.g585150.t1.2.v5.5;pacid=30784690	-6982
chromosome_13	3140891	3140892	19	-	chromosome_13	five_prime_UTR	3147873	3148117	+	ID=Cre13.g585150.t1.2.v5.5.five_prime_UTR.1;Parent=Cre13.g585150.t1.2.v5.5;pacid=30784690	-6981
chromosome_3	6860202	6860203	19	-	chromosome_3	five_prime_UTR	6867166	6867346	+	ID=Cre03.g198450.t1.2.v5.5.five_prime_UTR.1;Parent=Cre03.g198450.t1.2.v5.5;pacid=30787661	-6963
chromosome_4	1941473	1941474	11	+	chromosome_4	five_prime_UTR	1934553	1934622	-	ID=Cre04.g218250.t1.2.v5.5.five_prime_UTR.1;Parent=Cre04.g218250.t1.2.v5.5;pacid=30791037	-6852
chromosome_scaffold_21	54338	54339	11	+	chromosome_scaffold_21	five_prime_UTR	47511	47635	-	ID=Cre21.g752247.t1.1.v5.5.five_prime_UTR.1;Parent=Cre21.g752247.t1.1.v5.5;pacid=30791621	-6704
chromosome_scaffold_21	54337	54338	12	+	chromosome_scaffold_21	five_prime_UTR	47511	47635	-	ID=Cre21.g752247.t1.1.v5.5.five_prime_UTR.1;Parent=Cre21.g752247.t1.1.v5.5;pacid=30791621	-6703
chromosome_scaffold_21	54336	54337	15	+	chromosome_scaffold_21	five_prime_UTR	47511	47635	-	ID=Cre21.g752247.t1.1.v5.5.five_prime_UTR.1;Parent=Cre21.g752247.t1.1.v5.5;pacid=30791621	-6702
chromosome_scaffold_21	54335	54336	22	+	chromosome_scaffold_21	five_prime_UTR	47511	47635	-	ID=Cre21.g752247.t1.1.v5.5.five_prime_UTR.1;Parent=Cre21.g752247.t1.1.v5.5;pacid=30791621	-6701
chromosome_2	4545498	4545499	12	-	chromosome_2	five_prime_UTR	4552199	4552488	+	ID=Cre02.g100800.t1.1.v5.5.five_prime_UTR.1;Parent=Cre02.g100800.t1.1.v5.5;pacid=30785486	-6700
chromosome_2	4545499	4545500	16	-	chromosome_2	five_prime_UTR	4552199	4552488	+	ID=Cre02.g100800.t1.1.v5.5.five_prime_UTR.1;Parent=Cre02.g100800.t1.1.v5.5;pacid=30785486	-6699
chromosome_scaffold_21	54332	54333	24	+	chromosome_scaffold_21	five_prime_UTR	47511	47635	-	ID=Cre21.g752247.t1.1.v5.5.five_prime_UTR.1;Parent=Cre21.g752247.t1.1.v5.5;pacid=30791621	-6698
chromosome_10	4973548	4973549	15	+	chromosome_10	five_prime_UTR	4966806	4966866	-	ID=Cre10.g455150.t1.2.v5.5.five_prime_UTR.1;Parent=Cre10.g455150.t1.2.v5.5;pacid=30790849	-6683
chromosome_1	6442304	6442305	16	-	chromosome_1	five_prime_UTR	6448983	6449485	+	ID=Cre01.g045825.t1.1.v5.5.five_prime_UTR.1;Parent=Cre01.g045825.t1.1.v5.5;pacid=30789066	-6678
chromosome_2	8868045	8868046	20	+	chromosome_2	five_prime_UTR	8860945	8861408	-	ID=Cre02.g142647.t1.1.v5.5.five_prime_UTR.1;Parent=Cre02.g142647.t1.1.v5.5;pacid=30785511	-6638
chromosome_2	8868044	8868045	20	+	chromosome_2	five_prime_UTR	8860945	8861408	-	ID=Cre02.g142647.t1.1.v5.5.five_prime_UTR.1;Parent=Cre02.g142647.t1.1.v5.5;pacid=30785511	-6637
chromosome_2	8868042	8868043	20	+	chromosome_2	five_prime_UTR	8860945	8861408	-	ID=Cre02.g142647.t1.1.v5.5.five_prime_UTR.1;Parent=Cre02.g142647.t1.1.v5.5;pacid=30785511	-6635
chromosome_2	8868041	8868042	13	+	chromosome_2	five_prime_UTR	8860945	8861408	-	ID=Cre02.g142647.t1.1.v5.5.five_prime_UTR.1;Parent=Cre02.g142647.t1.1.v5.5;pacid=30785511	-6634
chromosome_2	8868039	8868040	18	+	chromosome_2	five_prime_UTR	8860945	8861408	-	ID=Cre02.g142647.t1.1.v5.5.five_prime_UTR.1;Parent=Cre02.g142647.t1.1.v5.5;pacid=30785511	-6632
chromosome_8	5030230	5030231	13	+	chromosome_8	five_prime_UTR	5023382	5023635	-	ID=Cre08.g386100.t1.1.v5.5.five_prime_UTR.1;Parent=Cre08.g386100.t1.1.v5.5;pacid=30773973	-6596
chromosome_8	5030209	5030210	13	+	chromosome_8	five_prime_UTR	5023382	5023635	-	ID=Cre08.g386100.t1.1.v5.5.five_prime_UTR.1;Parent=Cre08.g386100.t1.1.v5.5;pacid=30773973	-6575
chromosome_8	5030203	5030204	42	+	chromosome_8	five_prime_UTR	5023382	5023635	-	ID=Cre08.g386100.t1.1.v5.5.five_prime_UTR.1;Parent=Cre08.g386100.t1.1.v5.5;pacid=30773973	-6569
chromosome_14	2150569	2150570	11	-	chromosome_14	five_prime_UTR	2157126	2157233	+	ID=Cre14.g622480.t1.1.v5.5.five_prime_UTR.1;Parent=Cre14.g622480.t1.1.v5.5;pacid=30776393	-6556
chromosome_8	5030083	5030084	10	+	chromosome_8	five_prime_UTR	5023382	5023635	-	ID=Cre08.g386100.t1.1.v5.5.five_prime_UTR.1;Parent=Cre08.g386100.t1.1.v5.5;pacid=30773973	-6449
chromosome_5	1994084	1994085	19	+	chromosome_5	five_prime_UTR	1987723	1987808	-	ID=Cre05.g241643.t1.1.v5.5.five_prime_UTR.1;Parent=Cre05.g241643.t1.1.v5.5;pacid=30783391	-6277
chromosome_5	1994082	1994083	16	+	chromosome_5	five_prime_UTR	1987723	1987808	-	ID=Cre05.g241643.t1.1.v5.5.five_prime_UTR.1;Parent=Cre05.g241643.t1.1.v5.5;pacid=30783391	-6275
chromosome_5	2870371	2870372	12	-	chromosome_5	five_prime_UTR	2876520	2876824	+	ID=Cre05.g237950.t1.1.v5.5.five_prime_UTR.1;Parent=Cre05.g237950.t1.1.v5.5;pacid=30783262	-6148
chromosome_2	4394235	4394236	13	-	chromosome_2	five_prime_UTR	4400377	4400518	+	ID=Cre02.g099700.t1.2.v5.5.five_prime_UTR.1;Parent=Cre02.g099700.t1.2.v5.5;pacid=30784874	-6141
chromosome_14	4150001	4150002	13	+	chromosome_14	five_prime_UTR	4143636	4143965	-	ID=Cre14.g634236.t1.1.v5.5.five_prime_UTR.1;Parent=Cre14.g634236.t1.1.v5.5;pacid=30776576	-6037
chromosome_1	1308247	1308248	10	-	chromosome_1	five_prime_UTR	1314166	1314700	+	ID=Cre01.g006670.t1.1.v5.5.five_prime_UTR.1;Parent=Cre01.g006670.t1.1.v5.5;pacid=30788720	-5918
chromosome_17	6651673	6651674	17	+	chromosome_17	five_prime_UTR	6645701	6645832	-	ID=Cre17.g743797.t1.1.v5.5.five_prime_UTR.1;Parent=Cre17.g743797.t1.1.v5.5;pacid=30782712	-5842
chromosome_14	1093419	1093420	12	-	chromosome_14	five_prime_UTR	1099236	1099498	+	ID=Cre14.g614950.t1.2.v5.5.five_prime_UTR.1;Parent=Cre14.g614950.t1.2.v5.5;pacid=30776480	-5816
chromosome_1	6025293	6025294	11	-	chromosome_1	five_prime_UTR	6031056	6031290	+	ID=Cre01.g042750.t1.2.v5.5.five_prime_UTR.1;Parent=Cre01.g042750.t1.2.v5.5;pacid=30789585	-5762
chromosome_1	6025295	6025296	12	-	chromosome_1	five_prime_UTR	6031056	6031290	+	ID=Cre01.g042750.t1.2.v5.5.five_prime_UTR.1;Parent=Cre01.g042750.t1.2.v5.5;pacid=30789585	-5760
chromosome_7	4899540	4899541	12	-	chromosome_7	five_prime_UTR	4905246	4905757	+	ID=Cre07.g346317.t1.1.v5.5.five_prime_UTR.1;Parent=Cre07.g346317.t1.1.v5.5;pacid=30775209	-5705
chromosome_2	4533167	4533168	14	+	chromosome_2	five_prime_UTR	4527256	4527510	-	ID=Cre02.g100633.t1.1.v5.5.five_prime_UTR.1;Parent=Cre02.g100633.t1.1.v5.5;pacid=30786332	-5658
chromosome_2	4533166	4533167	16	+	chromosome_2	five_prime_UTR	4527256	4527510	-	ID=Cre02.g100633.t1.1.v5.5.five_prime_UTR.1;Parent=Cre02.g100633.t1.1.v5.5;pacid=30786332	-5657
chromosome_2	4533165	4533166	44	+	chromosome_2	five_prime_UTR	4527256	4527510	-	ID=Cre02.g100633.t1.1.v5.5.five_prime_UTR.1;Parent=Cre02.g100633.t1.1.v5.5;pacid=30786332	-5656
chromosome_1	1314207	1314208	19	+	chromosome_1	five_prime_UTR	1308620	1308705	-	ID=Cre01.g006656.t1.1.v5.5.five_prime_UTR.1;Parent=Cre01.g006656.t1.1.v5.5;pacid=30789463	-5503
chromosome_1	7469259	7469260	24	+	chromosome_1	five_prime_UTR	7463537	7463777	-	ID=Cre01.g053550.t1.1.v5.5.five_prime_UTR.1;Parent=Cre01.g053550.t1.1.v5.5;pacid=30789133	-5483
chromosome_1	7469258	7469259	10	+	chromosome_1	five_prime_UTR	7463537	7463777	-	ID=Cre01.g053550.t1.1.v5.5.five_prime_UTR.1;Parent=Cre01.g053550.t1.1.v5.5;pacid=30789133	-5482
chromosome_1	7469257	7469258	35	+	chromosome_1	five_prime_UTR	7463537	7463777	-	ID=Cre01.g053550.t1.1.v5.5.five_prime_UTR.1;Parent=Cre01.g053550.t1.1.v5.5;pacid=30789133	-5481
chromosome_2	4394923	4394924	13	-	chromosome_2	five_prime_UTR	4400377	4400518	+	ID=Cre02.g099700.t1.2.v5.5.five_prime_UTR.1;Parent=Cre02.g099700.t1.2.v5.5;pacid=30784874	-5453
chromosome_10	3070146	3070147	14	-	chromosome_10	five_prime_UTR	3075526	3075589	+	ID=Cre10.g441650.t1.1.v5.5.five_prime_UTR.1;Parent=Cre10.g441650.t1.1.v5.5;pacid=30790445	-5379
chromosome_3	3085911	3085912	20	-	chromosome_3	five_prime_UTR	3091232	3091355	+	ID=Cre03.g164700.t1.2.v5.5.five_prime_UTR.1;Parent=Cre03.g164700.t1.2.v5.5;pacid=30787903	-5320
chromosome_3	3085912	3085913	18	-	chromosome_3	five_prime_UTR	3091232	3091355	+	ID=Cre03.g164700.t1.2.v5.5.five_prime_UTR.1;Parent=Cre03.g164700.t1.2.v5.5;pacid=30787903	-5319
chromosome_3	3085913	3085914	34	-	chromosome_3	five_prime_UTR	3091232	3091355	+	ID=Cre03.g164700.t1.2.v5.5.five_prime_UTR.1;Parent=Cre03.g164700.t1.2.v5.5;pacid=30787903	-5318
chromosome_13	1999935	1999936	11	-	chromosome_13	five_prime_UTR	2005188	2005452	+	ID=Cre13.g576720.t1.1.v5.5.five_prime_UTR.1;Parent=Cre13.g576720.t1.1.v5.5;pacid=30783992	-5252
chromosome_8	5028856	5028857	11	+	chromosome_8	five_prime_UTR	5023382	5023635	-	ID=Cre08.g386100.t1.1.v5.5.five_prime_UTR.1;Parent=Cre08.g386100.t1.1.v5.5;pacid=30773973	-5222
chromosome_2	741926	741927	44	-	chromosome_2	five_prime_UTR	747148	747249	+	ID=Cre02.g078550.t1.2.v5.5.five_prime_UTR.1;Parent=Cre02.g078550.t1.2.v5.5;pacid=30785213	-5221
chromosome_1	1016240	1016241	12	-	chromosome_1	five_prime_UTR	1021426	1021802	+	ID=Cre01.g005850.t1.2.v5.5.five_prime_UTR.1;Parent=Cre01.g005850.t1.2.v5.5;pacid=30788374	-5185
chromosome_1	4841285	4841286	22	+	chromosome_1	five_prime_UTR	4836008	4836159	-	ID=Cre01.g033532.t1.1.v5.5.five_prime_UTR.1;Parent=Cre01.g033532.t1.1.v5.5;pacid=30788317	-5127
chromosome_1	4841283	4841284	27	+	chromosome_1	five_prime_UTR	4836008	4836159	-	ID=Cre01.g033532.t1.1.v5.5.five_prime_UTR.1;Parent=Cre01.g033532.t1.1.v5.5;pacid=30788317	-5125
chromosome_4	1661508	1661509	34	-	chromosome_4	five_prime_UTR	1666581	1667341	+	ID=Cre04.g213002.t1.1.v5.5.five_prime_UTR.1;Parent=Cre04.g213002.t1.1.v5.5;pacid=30791239	-5072
chromosome_4	1661510	1661511	19	-	chromosome_4	five_prime_UTR	1666581	1667341	+	ID=Cre04.g213002.t1.1.v5.5.five_prime_UTR.1;Parent=Cre04.g213002.t1.1.v5.5;pacid=30791239	-5070
chromosome_9	7359407	7359408	54	+	chromosome_9	five_prime_UTR	7353978	7354415	-	ID=Cre09.g413100.t1.1.v5.5.five_prime_UTR.1;Parent=Cre09.g413100.t1.1.v5.5;pacid=30780729	-4993
chromosome_9	7359406	7359407	108	+	chromosome_9	five_prime_UTR	7353978	7354415	-	ID=Cre09.g413100.t1.1.v5.5.five_prime_UTR.1;Parent=Cre09.g413100.t1.1.v5.5;pacid=30780729	-4992
chromosome_9	7359402	7359403	17	+	chromosome_9	five_prime_UTR	7353978	7354415	-	ID=Cre09.g413100.t1.1.v5.5.five_prime_UTR.1;Parent=Cre09.g413100.t1.1.v5.5;pacid=30780729	-4988
chromosome_2	2635270	2635271	23	-	chromosome_2	five_prime_UTR	2640258	2640542	+	ID=Cre02.g093202.t1.1.v5.5.five_prime_UTR.1;Parent=Cre02.g093202.t1.1.v5.5;pacid=30784804	-4987
chromosome_7	2829601	2829602	11	+	chromosome_7	five_prime_UTR	2824574	2824638	-	ID=Cre07.g331900.t1.2.v5.5.five_prime_UTR.1;Parent=Cre07.g331900.t1.2.v5.5;pacid=30774339	-4964
chromosome_1	133276	133277	21	-	chromosome_1	five_prime_UTR	138226	138378	+	ID=Cre01.g001150.t1.1.v5.5.five_prime_UTR.1;Parent=Cre01.g001150.t1.1.v5.5;pacid=30789149	-4949
chromosome_1	133278	133279	25	-	chromosome_1	five_prime_UTR	138226	138378	+	ID=Cre01.g001150.t1.1.v5.5.five_prime_UTR.1;Parent=Cre01.g001150.t1.1.v5.5;pacid=30789149	-4947
chromosome_1	133283	133284	15	-	chromosome_1	five_prime_UTR	138226	138378	+	ID=Cre01.g001150.t1.1.v5.5.five_prime_UTR.1;Parent=Cre01.g001150.t1.1.v5.5;pacid=30789149	-4942
chromosome_7	2829557	2829558	19	+	chromosome_7	five_prime_UTR	2824574	2824638	-	ID=Cre07.g331900.t1.2.v5.5.five_prime_UTR.1;Parent=Cre07.g331900.t1.2.v5.5;pacid=30774339	-4920
chromosome_10	4952092	4952093	40	+	chromosome_10	five_prime_UTR	4947240	4947256	-	ID=Cre10.g455050.t1.2.v5.5.five_prime_UTR.1;Parent=Cre10.g455050.t1.2.v5.5;pacid=30790100	-4837
chromosome_10	4952091	4952092	55	+	chromosome_10	five_prime_UTR	4947240	4947256	-	ID=Cre10.g455050.t1.2.v5.5.five_prime_UTR.1;Parent=Cre10.g455050.t1.2.v5.5;pacid=30790100	-4836
chromosome_10	4952090	4952091	104	+	chromosome_10	five_prime_UTR	4947240	4947256	-	ID=Cre10.g455050.t1.2.v5.5.five_prime_UTR.1;Parent=Cre10.g455050.t1.2.v5.5;pacid=30790100	-4835
chromosome_10	4952089	4952090	370	+	chromosome_10	five_prime_UTR	4947240	4947256	-	ID=Cre10.g455050.t1.2.v5.5.five_prime_UTR.1;Parent=Cre10.g455050.t1.2.v5.5;pacid=30790100	-4834
chromosome_10	4952087	4952088	22	+	chromosome_10	five_prime_UTR	4947240	4947256	-	ID=Cre10.g455050.t1.2.v5.5.five_prime_UTR.1;Parent=Cre10.g455050.t1.2.v5.5;pacid=30790100	-4832
chromosome_scaffold_39	18156	18157	27	+	chromosome_scaffold_39	five_prime_UTR	13316	13345	-	ID=Cre39.g760097.t1.1.v5.5.five_prime_UTR.1;Parent=Cre39.g760097.t1.1.v5.5;pacid=30782935	-4812
chromosome_scaffold_39	18154	18155	17	+	chromosome_scaffold_39	five_prime_UTR	13316	13345	-	ID=Cre39.g760097.t1.1.v5.5.five_prime_UTR.1;Parent=Cre39.g760097.t1.1.v5.5;pacid=30782935	-4810
chromosome_scaffold_39	18153	18154	50	+	chromosome_scaffold_39	five_prime_UTR	13316	13345	-	ID=Cre39.g760097.t1.1.v5.5.five_prime_UTR.1;Parent=Cre39.g760097.t1.1.v5.5;pacid=30782935	-4809
chromosome_scaffold_39	18152	18153	83	+	chromosome_scaffold_39	five_prime_UTR	13316	13345	-	ID=Cre39.g760097.t1.1.v5.5.five_prime_UTR.1;Parent=Cre39.g760097.t1.1.v5.5;pacid=30782935	-4808
chromosome_scaffold_39	18151	18152	10	+	chromosome_scaffold_39	five_prime_UTR	13316	13345	-	ID=Cre39.g760097.t1.1.v5.5.five_prime_UTR.1;Parent=Cre39.g760097.t1.1.v5.5;pacid=30782935	-4807
chromosome_4	317120	317121	19	+	chromosome_4	five_prime_UTR	312242	312330	-	ID=Cre04.g217905.t1.1.v5.5.five_prime_UTR.1;Parent=Cre04.g217905.t1.1.v5.5;pacid=30791357	-4791
chromosome_scaffold_39	18091	18092	13	+	chromosome_scaffold_39	five_prime_UTR	13316	13345	-	ID=Cre39.g760097.t1.1.v5.5.five_prime_UTR.1;Parent=Cre39.g760097.t1.1.v5.5;pacid=30782935	-4747
chromosome_4	1661841	1661842	22	-	chromosome_4	five_prime_UTR	1666581	1667341	+	ID=Cre04.g213002.t1.1.v5.5.five_prime_UTR.1;Parent=Cre04.g213002.t1.1.v5.5;pacid=30791239	-4739
chromosome_13	4250251	4250252	22	+	chromosome_13	five_prime_UTR	4245353	4245514	-	ID=Cre13.g598957.t1.1.v5.5.five_prime_UTR.1;Parent=Cre13.g598957.t1.1.v5.5;pacid=30784729	-4738
chromosome_4	1661842	1661843	20	-	chromosome_4	five_prime_UTR	1666581	1667341	+	ID=Cre04.g213002.t1.1.v5.5.five_prime_UTR.1;Parent=Cre04.g213002.t1.1.v5.5;pacid=30791239	-4738
chromosome_13	4250249	4250250	11	+	chromosome_13	five_prime_UTR	4245353	4245514	-	ID=Cre13.g598957.t1.1.v5.5.five_prime_UTR.1;Parent=Cre13.g598957.t1.1.v5.5;pacid=30784729	-4736
chromosome_scaffold_39	18080	18081	12	+	chromosome_scaffold_39	five_prime_UTR	13316	13345	-	ID=Cre39.g760097.t1.1.v5.5.five_prime_UTR.1;Parent=Cre39.g760097.t1.1.v5.5;pacid=30782935	-4736
chromosome_4	1661846	1661847	43	-	chromosome_4	five_prime_UTR	1666581	1667341	+	ID=Cre04.g213002.t1.1.v5.5.five_prime_UTR.1;Parent=Cre04.g213002.t1.1.v5.5;pacid=30791239	-4734
chromosome_4	1661848	1661849	81	-	chromosome_4	five_prime_UTR	1666581	1667341	+	ID=Cre04.g213002.t1.1.v5.5.five_prime_UTR.1;Parent=Cre04.g213002.t1.1.v5.5;pacid=30791239	-4732
chromosome_4	1661850	1661851	24	-	chromosome_4	five_prime_UTR	1666581	1667341	+	ID=Cre04.g213002.t1.1.v5.5.five_prime_UTR.1;Parent=Cre04.g213002.t1.1.v5.5;pacid=30791239	-4730
chromosome_4	1661851	1661852	11	-	chromosome_4	five_prime_UTR	1666581	1667341	+	ID=Cre04.g213002.t1.1.v5.5.five_prime_UTR.1;Parent=Cre04.g213002.t1.1.v5.5;pacid=30791239	-4729
chromosome_4	1661852	1661853	19	-	chromosome_4	five_prime_UTR	1666581	1667341	+	ID=Cre04.g213002.t1.1.v5.5.five_prime_UTR.1;Parent=Cre04.g213002.t1.1.v5.5;pacid=30791239	-4728
chromosome_1	2917329	2917330	14	-	chromosome_1	five_prime_UTR	2922057	2922261	+	ID=Cre01.g017750.t1.1.v5.5.five_prime_UTR.1;Parent=Cre01.g017750.t1.1.v5.5;pacid=30788953	-4727
chromosome_1	2917330	2917331	29	-	chromosome_1	five_prime_UTR	2922057	2922261	+	ID=Cre01.g017750.t1.1.v5.5.five_prime_UTR.1;Parent=Cre01.g017750.t1.1.v5.5;pacid=30788953	-4726
chromosome_1	1309491	1309492	13	-	chromosome_1	five_prime_UTR	1314166	1314700	+	ID=Cre01.g006670.t1.1.v5.5.five_prime_UTR.1;Parent=Cre01.g006670.t1.1.v5.5;pacid=30788720	-4674
chromosome_1	1309492	1309493	75	-	chromosome_1	five_prime_UTR	1314166	1314700	+	ID=Cre01.g006670.t1.1.v5.5.five_prime_UTR.1;Parent=Cre01.g006670.t1.1.v5.5;pacid=30788720	-4673
chromosome_1	1309493	1309494	177	-	chromosome_1	five_prime_UTR	1314166	1314700	+	ID=Cre01.g006670.t1.1.v5.5.five_prime_UTR.1;Parent=Cre01.g006670.t1.1.v5.5;pacid=30788720	-4672
chromosome_1	1309494	1309495	227	-	chromosome_1	five_prime_UTR	1314166	1314700	+	ID=Cre01.g006670.t1.1.v5.5.five_prime_UTR.1;Parent=Cre01.g006670.t1.1.v5.5;pacid=30788720	-4671
chromosome_1	1309495	1309496	219	-	chromosome_1	five_prime_UTR	1314166	1314700	+	ID=Cre01.g006670.t1.1.v5.5.five_prime_UTR.1;Parent=Cre01.g006670.t1.1.v5.5;pacid=30788720	-4670
chromosome_1	1309496	1309497	189	-	chromosome_1	five_prime_UTR	1314166	1314700	+	ID=Cre01.g006670.t1.1.v5.5.five_prime_UTR.1;Parent=Cre01.g006670.t1.1.v5.5;pacid=30788720	-4669
chromosome_1	1309497	1309498	147	-	chromosome_1	five_prime_UTR	1314166	1314700	+	ID=Cre01.g006670.t1.1.v5.5.five_prime_UTR.1;Parent=Cre01.g006670.t1.1.v5.5;pacid=30788720	-4668
chromosome_1	1309498	1309499	117	-	chromosome_1	five_prime_UTR	1314166	1314700	+	ID=Cre01.g006670.t1.1.v5.5.five_prime_UTR.1;Parent=Cre01.g006670.t1.1.v5.5;pacid=30788720	-4667
chromosome_1	1309499	1309500	91	-	chromosome_1	five_prime_UTR	1314166	1314700	+	ID=Cre01.g006670.t1.1.v5.5.five_prime_UTR.1;Parent=Cre01.g006670.t1.1.v5.5;pacid=30788720	-4666
chromosome_1	1309500	1309501	62	-	chromosome_1	five_prime_UTR	1314166	1314700	+	ID=Cre01.g006670.t1.1.v5.5.five_prime_UTR.1;Parent=Cre01.g006670.t1.1.v5.5;pacid=30788720	-4665
chromosome_1	1309501	1309502	63	-	chromosome_1	five_prime_UTR	1314166	1314700	+	ID=Cre01.g006670.t1.1.v5.5.five_prime_UTR.1;Parent=Cre01.g006670.t1.1.v5.5;pacid=30788720	-4664
chromosome_1	1309502	1309503	39	-	chromosome_1	five_prime_UTR	1314166	1314700	+	ID=Cre01.g006670.t1.1.v5.5.five_prime_UTR.1;Parent=Cre01.g006670.t1.1.v5.5;pacid=30788720	-4663
chromosome_1	1309503	1309504	30	-	chromosome_1	five_prime_UTR	1314166	1314700	+	ID=Cre01.g006670.t1.1.v5.5.five_prime_UTR.1;Parent=Cre01.g006670.t1.1.v5.5;pacid=30788720	-4662
chromosome_1	1309504	1309505	35	-	chromosome_1	five_prime_UTR	1314166	1314700	+	ID=Cre01.g006670.t1.1.v5.5.five_prime_UTR.1;Parent=Cre01.g006670.t1.1.v5.5;pacid=30788720	-4661
chromosome_1	1309505	1309506	46	-	chromosome_1	five_prime_UTR	1314166	1314700	+	ID=Cre01.g006670.t1.1.v5.5.five_prime_UTR.1;Parent=Cre01.g006670.t1.1.v5.5;pacid=30788720	-4660
chromosome_1	1309506	1309507	38	-	chromosome_1	five_prime_UTR	1314166	1314700	+	ID=Cre01.g006670.t1.1.v5.5.five_prime_UTR.1;Parent=Cre01.g006670.t1.1.v5.5;pacid=30788720	-4659
chromosome_1	1309507	1309508	45	-	chromosome_1	five_prime_UTR	1314166	1314700	+	ID=Cre01.g006670.t1.1.v5.5.five_prime_UTR.1;Parent=Cre01.g006670.t1.1.v5.5;pacid=30788720	-4658
chromosome_1	2917410	2917411	13	-	chromosome_1	five_prime_UTR	2922057	2922261	+	ID=Cre01.g017750.t1.1.v5.5.five_prime_UTR.1;Parent=Cre01.g017750.t1.1.v5.5;pacid=30788953	-4646
chromosome_1	2917411	2917412	59	-	chromosome_1	five_prime_UTR	2922057	2922261	+	ID=Cre01.g017750.t1.1.v5.5.five_prime_UTR.1;Parent=Cre01.g017750.t1.1.v5.5;pacid=30788953	-4645
chromosome_1	2917412	2917413	410	-	chromosome_1	five_prime_UTR	2922057	2922261	+	ID=Cre01.g017750.t1.1.v5.5.five_prime_UTR.1;Parent=Cre01.g017750.t1.1.v5.5;pacid=30788953	-4644
chromosome_1	69594	69595	18	+	chromosome_1	five_prime_UTR	64855	64955	-	ID=Cre01.g000400.t1.2.v5.5.five_prime_UTR.1;Parent=Cre01.g000400.t1.2.v5.5;pacid=30789110	-4640
chromosome_1	69592	69593	82	+	chromosome_1	five_prime_UTR	64855	64955	-	ID=Cre01.g000400.t1.2.v5.5.five_prime_UTR.1;Parent=Cre01.g000400.t1.2.v5.5;pacid=30789110	-4638
chromosome_1	69591	69592	69	+	chromosome_1	five_prime_UTR	64855	64955	-	ID=Cre01.g000400.t1.2.v5.5.five_prime_UTR.1;Parent=Cre01.g000400.t1.2.v5.5;pacid=30789110	-4637
chromosome_1	2917419	2917420	75	-	chromosome_1	five_prime_UTR	2922057	2922261	+	ID=Cre01.g017750.t1.1.v5.5.five_prime_UTR.1;Parent=Cre01.g017750.t1.1.v5.5;pacid=30788953	-4637
chromosome_1	2917420	2917421	45	-	chromosome_1	five_prime_UTR	2922057	2922261	+	ID=Cre01.g017750.t1.1.v5.5.five_prime_UTR.1;Parent=Cre01.g017750.t1.1.v5.5;pacid=30788953	-4636
chromosome_1	2917421	2917422	78	-	chromosome_1	five_prime_UTR	2922057	2922261	+	ID=Cre01.g017750.t1.1.v5.5.five_prime_UTR.1;Parent=Cre01.g017750.t1.1.v5.5;pacid=30788953	-4635
chromosome_1	2917429	2917430	10	-	chromosome_1	five_prime_UTR	2922057	2922261	+	ID=Cre01.g017750.t1.1.v5.5.five_prime_UTR.1;Parent=Cre01.g017750.t1.1.v5.5;pacid=30788953	-4627
chromosome_1	2917430	2917431	21	-	chromosome_1	five_prime_UTR	2922057	2922261	+	ID=Cre01.g017750.t1.1.v5.5.five_prime_UTR.1;Parent=Cre01.g017750.t1.1.v5.5;pacid=30788953	-4626
chromosome_1	2917458	2917459	20	-	chromosome_1	five_prime_UTR	2922057	2922261	+	ID=Cre01.g017750.t1.1.v5.5.five_prime_UTR.1;Parent=Cre01.g017750.t1.1.v5.5;pacid=30788953	-4598
chromosome_2	6956528	6956529	11	-	chromosome_2	five_prime_UTR	6961072	6961154	+	ID=Cre02.g120350.t1.2.v5.5.five_prime_UTR.1;Parent=Cre02.g120350.t1.2.v5.5;pacid=30785164	-4543
chromosome_scaffold_39	17885	17886	26	+	chromosome_scaffold_39	five_prime_UTR	13316	13345	-	ID=Cre39.g760097.t1.1.v5.5.five_prime_UTR.1;Parent=Cre39.g760097.t1.1.v5.5;pacid=30782935	-4541
chromosome_scaffold_39	17884	17885	14	+	chromosome_scaffold_39	five_prime_UTR	13316	13345	-	ID=Cre39.g760097.t1.1.v5.5.five_prime_UTR.1;Parent=Cre39.g760097.t1.1.v5.5;pacid=30782935	-4540
chromosome_scaffold_39	17883	17884	101	+	chromosome_scaffold_39	five_prime_UTR	13316	13345	-	ID=Cre39.g760097.t1.1.v5.5.five_prime_UTR.1;Parent=Cre39.g760097.t1.1.v5.5;pacid=30782935	-4539
chromosome_scaffold_39	17882	17883	44	+	chromosome_scaffold_39	five_prime_UTR	13316	13345	-	ID=Cre39.g760097.t1.1.v5.5.five_prime_UTR.1;Parent=Cre39.g760097.t1.1.v5.5;pacid=30782935	-4538
chromosome_scaffold_39	17881	17882	17	+	chromosome_scaffold_39	five_prime_UTR	13316	13345	-	ID=Cre39.g760097.t1.1.v5.5.five_prime_UTR.1;Parent=Cre39.g760097.t1.1.v5.5;pacid=30782935	-4537
chromosome_scaffold_39	17880	17881	78	+	chromosome_scaffold_39	five_prime_UTR	13316	13345	-	ID=Cre39.g760097.t1.1.v5.5.five_prime_UTR.1;Parent=Cre39.g760097.t1.1.v5.5;pacid=30782935	-4536
chromosome_17	2662430	2662431	33	+	chromosome_17	five_prime_UTR	2657896	2657920	-	ID=Cre17.g717550.t1.2.v5.5.five_prime_UTR.1;Parent=Cre17.g717550.t1.2.v5.5;pacid=30781735	-4511
chromosome_1	2917557	2917558	14	-	chromosome_1	five_prime_UTR	2922057	2922261	+	ID=Cre01.g017750.t1.1.v5.5.five_prime_UTR.1;Parent=Cre01.g017750.t1.1.v5.5;pacid=30788953	-4499
chromosome_1	2917562	2917563	43	-	chromosome_1	five_prime_UTR	2922057	2922261	+	ID=Cre01.g017750.t1.1.v5.5.five_prime_UTR.1;Parent=Cre01.g017750.t1.1.v5.5;pacid=30788953	-4494
chromosome_1	2917563	2917564	278	-	chromosome_1	five_prime_UTR	2922057	2922261	+	ID=Cre01.g017750.t1.1.v5.5.five_prime_UTR.1;Parent=Cre01.g017750.t1.1.v5.5;pacid=30788953	-4493
chromosome_1	2917565	2917566	10	-	chromosome_1	five_prime_UTR	2922057	2922261	+	ID=Cre01.g017750.t1.1.v5.5.five_prime_UTR.1;Parent=Cre01.g017750.t1.1.v5.5;pacid=30788953	-4491
chromosome_1	2917566	2917567	14	-	chromosome_1	five_prime_UTR	2922057	2922261	+	ID=Cre01.g017750.t1.1.v5.5.five_prime_UTR.1;Parent=Cre01.g017750.t1.1.v5.5;pacid=30788953	-4490
chromosome_1	2917567	2917568	14	-	chromosome_1	five_prime_UTR	2922057	2922261	+	ID=Cre01.g017750.t1.1.v5.5.five_prime_UTR.1;Parent=Cre01.g017750.t1.1.v5.5;pacid=30788953	-4489
chromosome_1	2917568	2917569	26	-	chromosome_1	five_prime_UTR	2922057	2922261	+	ID=Cre01.g017750.t1.1.v5.5.five_prime_UTR.1;Parent=Cre01.g017750.t1.1.v5.5;pacid=30788953	-4488
chromosome_6	7982351	7982352	70	-	chromosome_6	five_prime_UTR	7986837	7986972	+	ID=Cre06.g303850.t1.1.v5.5.five_prime_UTR.1;Parent=Cre06.g303850.t1.1.v5.5;pacid=30779656	-4485
chromosome_1	2917582	2917583	15	-	chromosome_1	five_prime_UTR	2922057	2922261	+	ID=Cre01.g017750.t1.1.v5.5.five_prime_UTR.1;Parent=Cre01.g017750.t1.1.v5.5;pacid=30788953	-4474
chromosome_1	2917585	2917586	18	-	chromosome_1	five_prime_UTR	2922057	2922261	+	ID=Cre01.g017750.t1.1.v5.5.five_prime_UTR.1;Parent=Cre01.g017750.t1.1.v5.5;pacid=30788953	-4471
chromosome_1	2917592	2917593	25	-	chromosome_1	five_prime_UTR	2922057	2922261	+	ID=Cre01.g017750.t1.1.v5.5.five_prime_UTR.1;Parent=Cre01.g017750.t1.1.v5.5;pacid=30788953	-4464
chromosome_1	2917594	2917595	20	-	chromosome_1	five_prime_UTR	2922057	2922261	+	ID=Cre01.g017750.t1.1.v5.5.five_prime_UTR.1;Parent=Cre01.g017750.t1.1.v5.5;pacid=30788953	-4462
chromosome_1	2917595	2917596	13	-	chromosome_1	five_prime_UTR	2922057	2922261	+	ID=Cre01.g017750.t1.1.v5.5.five_prime_UTR.1;Parent=Cre01.g017750.t1.1.v5.5;pacid=30788953	-4461
chromosome_1	2917596	2917597	12	-	chromosome_1	five_prime_UTR	2922057	2922261	+	ID=Cre01.g017750.t1.1.v5.5.five_prime_UTR.1;Parent=Cre01.g017750.t1.1.v5.5;pacid=30788953	-4460
chromosome_1	2917597	2917598	16	-	chromosome_1	five_prime_UTR	2922057	2922261	+	ID=Cre01.g017750.t1.1.v5.5.five_prime_UTR.1;Parent=Cre01.g017750.t1.1.v5.5;pacid=30788953	-4459
chromosome_1	2917599	2917600	16	-	chromosome_1	five_prime_UTR	2922057	2922261	+	ID=Cre01.g017750.t1.1.v5.5.five_prime_UTR.1;Parent=Cre01.g017750.t1.1.v5.5;pacid=30788953	-4457
chromosome_1	2917601	2917602	16	-	chromosome_1	five_prime_UTR	2922057	2922261	+	ID=Cre01.g017750.t1.1.v5.5.five_prime_UTR.1;Parent=Cre01.g017750.t1.1.v5.5;pacid=30788953	-4455
chromosome_1	2917606	2917607	10	-	chromosome_1	five_prime_UTR	2922057	2922261	+	ID=Cre01.g017750.t1.1.v5.5.five_prime_UTR.1;Parent=Cre01.g017750.t1.1.v5.5;pacid=30788953	-4450
chromosome_1	2917607	2917608	11	-	chromosome_1	five_prime_UTR	2922057	2922261	+	ID=Cre01.g017750.t1.1.v5.5.five_prime_UTR.1;Parent=Cre01.g017750.t1.1.v5.5;pacid=30788953	-4449
chromosome_1	2917608	2917609	57	-	chromosome_1	five_prime_UTR	2922057	2922261	+	ID=Cre01.g017750.t1.1.v5.5.five_prime_UTR.1;Parent=Cre01.g017750.t1.1.v5.5;pacid=30788953	-4448
chromosome_16	4012704	4012705	10	+	chromosome_16	five_prime_UTR	4007672	4008265	-	ID=Cre16.g670501.t1.1.v5.5.five_prime_UTR.1;Parent=Cre16.g670501.t1.1.v5.5;pacid=30778154	-4440
chromosome_1	2917633	2917634	10	-	chromosome_1	five_prime_UTR	2922057	2922261	+	ID=Cre01.g017750.t1.1.v5.5.five_prime_UTR.1;Parent=Cre01.g017750.t1.1.v5.5;pacid=30788953	-4423
chromosome_1	1393823	1393824	13	+	chromosome_1	five_prime_UTR	1389022	1389407	-	ID=Cre01.g006900.t1.1.v5.5.five_prime_UTR.1;Parent=Cre01.g006900.t1.1.v5.5;pacid=30789539	-4417
chromosome_1	1393820	1393821	18	+	chromosome_1	five_prime_UTR	1389022	1389407	-	ID=Cre01.g006900.t1.1.v5.5.five_prime_UTR.1;Parent=Cre01.g006900.t1.1.v5.5;pacid=30789539	-4414
chromosome_2	8930649	8930650	11	-	chromosome_2	five_prime_UTR	8935055	8935250	+	ID=Cre02.g142807.t1.1.v5.5.five_prime_UTR.1;Parent=Cre02.g142807.t1.1.v5.5;pacid=30785138	-4405
chromosome_2	8930651	8930652	22	-	chromosome_2	five_prime_UTR	8935055	8935250	+	ID=Cre02.g142807.t1.1.v5.5.five_prime_UTR.1;Parent=Cre02.g142807.t1.1.v5.5;pacid=30785138	-4403
chromosome_2	8930652	8930653	14	-	chromosome_2	five_prime_UTR	8935055	8935250	+	ID=Cre02.g142807.t1.1.v5.5.five_prime_UTR.1;Parent=Cre02.g142807.t1.1.v5.5;pacid=30785138	-4402
chromosome_2	2635887	2635888	16	-	chromosome_2	five_prime_UTR	2640258	2640542	+	ID=Cre02.g093202.t1.1.v5.5.five_prime_UTR.1;Parent=Cre02.g093202.t1.1.v5.5;pacid=30784804	-4370
chromosome_scaffold_22	162283	162284	10	+	chromosome_scaffold_22	five_prime_UTR	157675	157915	-	ID=Cre22.g754197.t1.1.v5.5.five_prime_UTR.1;Parent=Cre22.g754197.t1.1.v5.5;pacid=30778268	-4369
chromosome_scaffold_22	162281	162282	26	+	chromosome_scaffold_22	five_prime_UTR	157675	157915	-	ID=Cre22.g754197.t1.1.v5.5.five_prime_UTR.1;Parent=Cre22.g754197.t1.1.v5.5;pacid=30778268	-4367
chromosome_scaffold_22	162279	162280	12	+	chromosome_scaffold_22	five_prime_UTR	157675	157915	-	ID=Cre22.g754197.t1.1.v5.5.five_prime_UTR.1;Parent=Cre22.g754197.t1.1.v5.5;pacid=30778268	-4365
chromosome_17	3234629	3234630	10	+	chromosome_17	five_prime_UTR	3230051	3230267	-	ID=Cre17.g722526.t1.1.v5.5.five_prime_UTR.1;Parent=Cre17.g722526.t1.1.v5.5;pacid=30782430	-4363
chromosome_17	2220603	2220604	92	-	chromosome_17	five_prime_UTR	2224917	2224968	+	ID=Cre17.g713450.t1.2.v5.5.five_prime_UTR.1;Parent=Cre17.g713450.t1.2.v5.5;pacid=30782606	-4313
chromosome_6	4722606	4722607	21	-	chromosome_6	five_prime_UTR	4726900	4727295	+	ID=Cre06.g278295.t1.1.v5.5.five_prime_UTR.1;Parent=Cre06.g278295.t1.1.v5.5;pacid=30779904	-4293
chromosome_6	4722607	4722608	39	-	chromosome_6	five_prime_UTR	4726900	4727295	+	ID=Cre06.g278295.t1.1.v5.5.five_prime_UTR.1;Parent=Cre06.g278295.t1.1.v5.5;pacid=30779904	-4292
chromosome_2	9118739	9118740	13	+	chromosome_2	five_prime_UTR	9114292	9114475	-	ID=Cre02.g143367.t1.1.v5.5.five_prime_UTR.1;Parent=Cre02.g143367.t1.1.v5.5;pacid=30785584	-4265
chromosome_6	4773215	4773216	14	+	chromosome_6	five_prime_UTR	4768502	4769021	-	ID=Cre06.g278301.t1.1.v5.5.five_prime_UTR.1;Parent=Cre06.g278301.t1.1.v5.5;pacid=30779088	-4195
chromosome_15	1379717	1379718	10	+	chromosome_15	five_prime_UTR	1375481	1375530	-	ID=Cre15.g642213.t1.1.v5.5.five_prime_UTR.1;Parent=Cre15.g642213.t1.1.v5.5;pacid=30783544	-4188
chromosome_15	1379715	1379716	21	+	chromosome_15	five_prime_UTR	1375481	1375530	-	ID=Cre15.g642213.t1.1.v5.5.five_prime_UTR.1;Parent=Cre15.g642213.t1.1.v5.5;pacid=30783544	-4186
chromosome_16	671457	671458	54	-	chromosome_16	five_prime_UTR	675553	675737	+	ID=Cre16.g691600.t1.1.v5.5.five_prime_UTR.1;Parent=Cre16.g691600.t1.1.v5.5;pacid=30777558	-4095
chromosome_10	2392304	2392305	10	+	chromosome_10	five_prime_UTR	2387858	2388212	-	ID=Cre10.g435250.t1.1.v5.5.five_prime_UTR.1;Parent=Cre10.g435250.t1.1.v5.5;pacid=30790169	-4093
chromosome_16	671459	671460	22	-	chromosome_16	five_prime_UTR	675553	675737	+	ID=Cre16.g691600.t1.1.v5.5.five_prime_UTR.1;Parent=Cre16.g691600.t1.1.v5.5;pacid=30777558	-4093
chromosome_10	1960951	1960952	11	+	chromosome_10	five_prime_UTR	1956336	1956866	-	ID=Cre10.g432250.t1.1.v5.5.five_prime_UTR.1;Parent=Cre10.g432250.t1.1.v5.5;pacid=30790453	-4086
chromosome_16	1150356	1150357	10	+	chromosome_16	five_prime_UTR	1146117	1146315	-	ID=Cre16.g650250.t1.2.v5.5.five_prime_UTR.1;Parent=Cre16.g650250.t1.2.v5.5;pacid=30776811	-4042
chromosome_16	1150350	1150351	204	+	chromosome_16	five_prime_UTR	1146117	1146315	-	ID=Cre16.g650250.t1.2.v5.5.five_prime_UTR.1;Parent=Cre16.g650250.t1.2.v5.5;pacid=30776811	-4036
chromosome_3	3496313	3496314	18	-	chromosome_3	five_prime_UTR	3500349	3500502	+	ID=Cre03.g167690.t1.1.v5.5.five_prime_UTR.1;Parent=Cre03.g167690.t1.1.v5.5;pacid=30788270	-4035
chromosome_3	3496315	3496316	44	-	chromosome_3	five_prime_UTR	3500349	3500502	+	ID=Cre03.g167690.t1.1.v5.5.five_prime_UTR.1;Parent=Cre03.g167690.t1.1.v5.5;pacid=30788270	-4033
chromosome_2	7324164	7324165	10	+	chromosome_2	five_prime_UTR	7320093	7320198	-	ID=Cre02.g145250.t1.2.v5.5.five_prime_UTR.1;Parent=Cre02.g145250.t1.2.v5.5;pacid=30786491	-3967
chromosome_12	1344521	1344522	29	-	chromosome_12	five_prime_UTR	1348488	1348711	+	ID=Cre12.g488550.t1.2.v5.5.five_prime_UTR.1;Parent=Cre12.g488550.t1.2.v5.5;pacid=30793012	-3966
chromosome_12	1344522	1344523	36	-	chromosome_12	five_prime_UTR	1348488	1348711	+	ID=Cre12.g488550.t1.2.v5.5.five_prime_UTR.1;Parent=Cre12.g488550.t1.2.v5.5;pacid=30793012	-3965
chromosome_8	3473557	3473558	28	-	chromosome_8	five_prime_UTR	3477507	3477863	+	ID=Cre08.g374950.t1.1.v5.5.five_prime_UTR.1;Parent=Cre08.g374950.t1.1.v5.5;pacid=30773998	-3949
chromosome_8	3473558	3473559	13	-	chromosome_8	five_prime_UTR	3477507	3477863	+	ID=Cre08.g374950.t1.1.v5.5.five_prime_UTR.1;Parent=Cre08.g374950.t1.1.v5.5;pacid=30773998	-3948
chromosome_6	8470380	8470381	23	-	chromosome_6	five_prime_UTR	8474316	8474427	+	ID=Cre06.g307600.t1.2.v5.5.five_prime_UTR.1;Parent=Cre06.g307600.t1.2.v5.5;pacid=30779514	-3935
chromosome_6	8470382	8470383	22	-	chromosome_6	five_prime_UTR	8474316	8474427	+	ID=Cre06.g307600.t1.2.v5.5.five_prime_UTR.1;Parent=Cre06.g307600.t1.2.v5.5;pacid=30779514	-3933
chromosome_10	992129	992130	17	+	chromosome_10	five_prime_UTR	988018	988221	-	ID=Cre10.g424850.t1.2.v5.5.five_prime_UTR.1;Parent=Cre10.g424850.t1.2.v5.5;pacid=30790537	-3909
chromosome_2	8956618	8956619	11	-	chromosome_2	five_prime_UTR	8960525	8960588	+	ID=Cre02.g142907.t1.1.v5.5.five_prime_UTR.1;Parent=Cre02.g142907.t1.1.v5.5;pacid=30785939	-3906
chromosome_10	992125	992126	10	+	chromosome_10	five_prime_UTR	988018	988221	-	ID=Cre10.g424850.t1.2.v5.5.five_prime_UTR.1;Parent=Cre10.g424850.t1.2.v5.5;pacid=30790537	-3905
chromosome_2	8956619	8956620	22	-	chromosome_2	five_prime_UTR	8960525	8960588	+	ID=Cre02.g142907.t1.1.v5.5.five_prime_UTR.1;Parent=Cre02.g142907.t1.1.v5.5;pacid=30785939	-3905
chromosome_6	2600492	2600493	53	-	chromosome_6	five_prime_UTR	2604372	2604834	+	ID=Cre06.g269550.t1.1.v5.5.five_prime_UTR.1;Parent=Cre06.g269550.t1.1.v5.5;pacid=30779827	-3879
chromosome_6	2600494	2600495	40	-	chromosome_6	five_prime_UTR	2604372	2604834	+	ID=Cre06.g269550.t1.1.v5.5.five_prime_UTR.1;Parent=Cre06.g269550.t1.1.v5.5;pacid=30779827	-3877
chromosome_6	2600495	2600496	10	-	chromosome_6	five_prime_UTR	2604372	2604834	+	ID=Cre06.g269550.t1.1.v5.5.five_prime_UTR.1;Parent=Cre06.g269550.t1.1.v5.5;pacid=30779827	-3876
chromosome_16	151661	151662	11	-	chromosome_16	five_prime_UTR	155536	155743	+	ID=Cre16.g695150.t1.1.v5.5.five_prime_UTR.1;Parent=Cre16.g695150.t1.1.v5.5;pacid=30776902	-3874
chromosome_16	3629779	3629780	22	-	chromosome_16	five_prime_UTR	3633646	3633778	+	ID=Cre16.g685929.t1.1.v5.5.five_prime_UTR.1;Parent=Cre16.g685929.t1.1.v5.5;pacid=30777219	-3866
chromosome_16	3629781	3629782	37	-	chromosome_16	five_prime_UTR	3633646	3633778	+	ID=Cre16.g685929.t1.1.v5.5.five_prime_UTR.1;Parent=Cre16.g685929.t1.1.v5.5;pacid=30777219	-3864
chromosome_14	4147757	4147758	22	+	chromosome_14	five_prime_UTR	4143636	4143965	-	ID=Cre14.g634236.t1.1.v5.5.five_prime_UTR.1;Parent=Cre14.g634236.t1.1.v5.5;pacid=30776576	-3793
chromosome_13	4295157	4295158	10	+	chromosome_13	five_prime_UTR	4291292	4291384	-	ID=Cre13.g600238.t1.1.v5.5.five_prime_UTR.1;Parent=Cre13.g600238.t1.1.v5.5;pacid=30783905	-3774
chromosome_13	4295156	4295157	24	+	chromosome_13	five_prime_UTR	4291292	4291384	-	ID=Cre13.g600238.t1.1.v5.5.five_prime_UTR.1;Parent=Cre13.g600238.t1.1.v5.5;pacid=30783905	-3773
chromosome_13	4295155	4295156	19	+	chromosome_13	five_prime_UTR	4291292	4291384	-	ID=Cre13.g600238.t1.1.v5.5.five_prime_UTR.1;Parent=Cre13.g600238.t1.1.v5.5;pacid=30783905	-3772
chromosome_14	4147736	4147737	14	+	chromosome_14	five_prime_UTR	4143636	4143965	-	ID=Cre14.g634236.t1.1.v5.5.five_prime_UTR.1;Parent=Cre14.g634236.t1.1.v5.5;pacid=30776576	-3772
chromosome_14	4147730	4147731	29	+	chromosome_14	five_prime_UTR	4143636	4143965	-	ID=Cre14.g634236.t1.1.v5.5.five_prime_UTR.1;Parent=Cre14.g634236.t1.1.v5.5;pacid=30776576	-3766
chromosome_10	1874945	1874946	12	+	chromosome_10	five_prime_UTR	1871133	1871249	-	ID=Cre10.g431500.t1.1.v5.5.five_prime_UTR.1;Parent=Cre10.g431500.t1.1.v5.5;pacid=30790926	-3697
chromosome_10	1874944	1874945	93	+	chromosome_10	five_prime_UTR	1871133	1871249	-	ID=Cre10.g431500.t1.1.v5.5.five_prime_UTR.1;Parent=Cre10.g431500.t1.1.v5.5;pacid=30790926	-3696
chromosome_10	1874943	1874944	733	+	chromosome_10	five_prime_UTR	1871133	1871249	-	ID=Cre10.g431500.t1.1.v5.5.five_prime_UTR.1;Parent=Cre10.g431500.t1.1.v5.5;pacid=30790926	-3695
chromosome_10	1874942	1874943	779	+	chromosome_10	five_prime_UTR	1871133	1871249	-	ID=Cre10.g431500.t1.1.v5.5.five_prime_UTR.1;Parent=Cre10.g431500.t1.1.v5.5;pacid=30790926	-3694
chromosome_10	1874941	1874942	41	+	chromosome_10	five_prime_UTR	1871133	1871249	-	ID=Cre10.g431500.t1.1.v5.5.five_prime_UTR.1;Parent=Cre10.g431500.t1.1.v5.5;pacid=30790926	-3693
chromosome_10	1874940	1874941	432	+	chromosome_10	five_prime_UTR	1871133	1871249	-	ID=Cre10.g431500.t1.1.v5.5.five_prime_UTR.1;Parent=Cre10.g431500.t1.1.v5.5;pacid=30790926	-3692
chromosome_10	1874939	1874940	84	+	chromosome_10	five_prime_UTR	1871133	1871249	-	ID=Cre10.g431500.t1.1.v5.5.five_prime_UTR.1;Parent=Cre10.g431500.t1.1.v5.5;pacid=30790926	-3691
chromosome_10	1874938	1874939	36	+	chromosome_10	five_prime_UTR	1871133	1871249	-	ID=Cre10.g431500.t1.1.v5.5.five_prime_UTR.1;Parent=Cre10.g431500.t1.1.v5.5;pacid=30790926	-3690
chromosome_6	8819968	8819969	18	-	chromosome_6	five_prime_UTR	8823619	8823811	+	ID=Cre06.g310400.t1.1.v5.5.five_prime_UTR.1;Parent=Cre06.g310400.t1.1.v5.5;pacid=30778466	-3650
chromosome_12	6077139	6077140	11	-	chromosome_12	five_prime_UTR	6080786	6080837	+	ID=Cre12.g535600.t1.1.v5.5.five_prime_UTR.1;Parent=Cre12.g535600.t1.1.v5.5;pacid=30792417	-3646
chromosome_14	4147610	4147611	11	+	chromosome_14	five_prime_UTR	4143636	4143965	-	ID=Cre14.g634236.t1.1.v5.5.five_prime_UTR.1;Parent=Cre14.g634236.t1.1.v5.5;pacid=30776576	-3646
chromosome_14	953579	953580	10	-	chromosome_14	five_prime_UTR	957201	957549	+	ID=Cre14.g613900.t1.2.v5.5.five_prime_UTR.1;Parent=Cre14.g613900.t1.2.v5.5;pacid=30776339	-3621
chromosome_16	7641150	7641151	19	+	chromosome_16	five_prime_UTR	7637448	7637565	-	ID=Cre16.g689759.t1.1.v5.5.five_prime_UTR.1;Parent=Cre16.g689759.t1.1.v5.5;pacid=30776899	-3586
chromosome_2	8956988	8956989	33	-	chromosome_2	five_prime_UTR	8960525	8960588	+	ID=Cre02.g142907.t1.1.v5.5.five_prime_UTR.1;Parent=Cre02.g142907.t1.1.v5.5;pacid=30785939	-3536
chromosome_2	8956989	8956990	85	-	chromosome_2	five_prime_UTR	8960525	8960588	+	ID=Cre02.g142907.t1.1.v5.5.five_prime_UTR.1;Parent=Cre02.g142907.t1.1.v5.5;pacid=30785939	-3535
chromosome_1	690976	690977	10	+	chromosome_1	five_prime_UTR	687162	687445	-	ID=Cre01.g003550.t1.1.v5.5.five_prime_UTR.1;Parent=Cre01.g003550.t1.1.v5.5;pacid=30789709	-3532
chromosome_1	7957186	7957187	15	-	chromosome_1	five_prime_UTR	7960687	7960715	+	ID=Cre01.g067647.t1.1.v5.5.five_prime_UTR.1;Parent=Cre01.g067647.t1.1.v5.5;pacid=30789327	-3500
chromosome_13	5025658	5025659	32	-	chromosome_13	five_prime_UTR	5029126	5029162	+	ID=Cre13.g606850.t1.2.v5.5.five_prime_UTR.1;Parent=Cre13.g606850.t1.2.v5.5;pacid=30784338	-3467
chromosome_13	5025659	5025660	33	-	chromosome_13	five_prime_UTR	5029126	5029162	+	ID=Cre13.g606850.t1.2.v5.5.five_prime_UTR.1;Parent=Cre13.g606850.t1.2.v5.5;pacid=30784338	-3466
chromosome_13	5025660	5025661	135	-	chromosome_13	five_prime_UTR	5029126	5029162	+	ID=Cre13.g606850.t1.2.v5.5.five_prime_UTR.1;Parent=Cre13.g606850.t1.2.v5.5;pacid=30784338	-3465
chromosome_13	5025661	5025662	433	-	chromosome_13	five_prime_UTR	5029126	5029162	+	ID=Cre13.g606850.t1.2.v5.5.five_prime_UTR.1;Parent=Cre13.g606850.t1.2.v5.5;pacid=30784338	-3464
chromosome_13	5025663	5025664	20	-	chromosome_13	five_prime_UTR	5029126	5029162	+	ID=Cre13.g606850.t1.2.v5.5.five_prime_UTR.1;Parent=Cre13.g606850.t1.2.v5.5;pacid=30784338	-3462
chromosome_13	1322557	1322558	32	+	chromosome_13	five_prime_UTR	1319014	1319236	-	ID=Cre13.g571251.t1.1.v5.5.five_prime_UTR.1;Parent=Cre13.g571251.t1.1.v5.5;pacid=30783874	-3322
chromosome_1	4525079	4525080	14	-	chromosome_1	five_prime_UTR	4528373	4528481	+	ID=Cre01.g030850.t1.2.v5.5.five_prime_UTR.1;Parent=Cre01.g030850.t1.2.v5.5;pacid=30789302	-3293
chromosome_1	6218093	6218094	15	+	chromosome_1	five_prime_UTR	6214673	6214863	-	ID=Cre01.g044400.t1.2.v5.5.five_prime_UTR.1;Parent=Cre01.g044400.t1.2.v5.5;pacid=30788663	-3231
chromosome_scaffold_21	164499	164500	21	-	chromosome_scaffold_21	five_prime_UTR	167716	167807	+	ID=Cre21.g753197.t1.1.v5.5.five_prime_UTR.1;Parent=Cre21.g753197.t1.1.v5.5;pacid=30791640	-3216
chromosome_9	908344	908345	16	+	chromosome_9	five_prime_UTR	905034	905167	-	ID=Cre09.g401301.t1.1.v5.5.five_prime_UTR.1;Parent=Cre09.g401301.t1.1.v5.5;pacid=30781153	-3178
chromosome_9	908343	908344	16	+	chromosome_9	five_prime_UTR	905034	905167	-	ID=Cre09.g401301.t1.1.v5.5.five_prime_UTR.1;Parent=Cre09.g401301.t1.1.v5.5;pacid=30781153	-3177
chromosome_9	908342	908343	59	+	chromosome_9	five_prime_UTR	905034	905167	-	ID=Cre09.g401301.t1.1.v5.5.five_prime_UTR.1;Parent=Cre09.g401301.t1.1.v5.5;pacid=30781153	-3176
chromosome_9	908337	908338	11	+	chromosome_9	five_prime_UTR	905034	905167	-	ID=Cre09.g401301.t1.1.v5.5.five_prime_UTR.1;Parent=Cre09.g401301.t1.1.v5.5;pacid=30781153	-3171
chromosome_1	6217999	6218000	22	+	chromosome_1	five_prime_UTR	6214673	6214863	-	ID=Cre01.g044400.t1.2.v5.5.five_prime_UTR.1;Parent=Cre01.g044400.t1.2.v5.5;pacid=30788663	-3137
chromosome_1	6217998	6217999	22	+	chromosome_1	five_prime_UTR	6214673	6214863	-	ID=Cre01.g044400.t1.2.v5.5.five_prime_UTR.1;Parent=Cre01.g044400.t1.2.v5.5;pacid=30788663	-3136
chromosome_1	6217997	6217998	34	+	chromosome_1	five_prime_UTR	6214673	6214863	-	ID=Cre01.g044400.t1.2.v5.5.five_prime_UTR.1;Parent=Cre01.g044400.t1.2.v5.5;pacid=30788663	-3135
chromosome_9	908288	908289	33	+	chromosome_9	five_prime_UTR	905034	905167	-	ID=Cre09.g401301.t1.1.v5.5.five_prime_UTR.1;Parent=Cre09.g401301.t1.1.v5.5;pacid=30781153	-3122
chromosome_9	908287	908288	45	+	chromosome_9	five_prime_UTR	905034	905167	-	ID=Cre09.g401301.t1.1.v5.5.five_prime_UTR.1;Parent=Cre09.g401301.t1.1.v5.5;pacid=30781153	-3121
chromosome_9	908286	908287	104	+	chromosome_9	five_prime_UTR	905034	905167	-	ID=Cre09.g401301.t1.1.v5.5.five_prime_UTR.1;Parent=Cre09.g401301.t1.1.v5.5;pacid=30781153	-3120
chromosome_9	908285	908286	65	+	chromosome_9	five_prime_UTR	905034	905167	-	ID=Cre09.g401301.t1.1.v5.5.five_prime_UTR.1;Parent=Cre09.g401301.t1.1.v5.5;pacid=30781153	-3119
chromosome_12	2194196	2194197	12	-	chromosome_12	five_prime_UTR	2197288	2197510	+	ID=Cre12.g508300.t1.1.v5.5.five_prime_UTR.1;Parent=Cre12.g508300.t1.1.v5.5;pacid=30792170	-3091
chromosome_13	2691005	2691006	81	-	chromosome_13	five_prime_UTR	2694096	2694476	+	ID=Cre13.g582100.t1.2.v5.5.five_prime_UTR.1;Parent=Cre13.g582100.t1.2.v5.5;pacid=30784290	-3090
chromosome_13	2691007	2691008	27	-	chromosome_13	five_prime_UTR	2694096	2694476	+	ID=Cre13.g582100.t1.2.v5.5.five_prime_UTR.1;Parent=Cre13.g582100.t1.2.v5.5;pacid=30784290	-3088
chromosome_13	2691010	2691011	10	-	chromosome_13	five_prime_UTR	2694096	2694476	+	ID=Cre13.g582100.t1.2.v5.5.five_prime_UTR.1;Parent=Cre13.g582100.t1.2.v5.5;pacid=30784290	-3085
chromosome_1	6217946	6217947	10	+	chromosome_1	five_prime_UTR	6214673	6214863	-	ID=Cre01.g044400.t1.2.v5.5.five_prime_UTR.1;Parent=Cre01.g044400.t1.2.v5.5;pacid=30788663	-3084
chromosome_1	6217944	6217945	11	+	chromosome_1	five_prime_UTR	6214673	6214863	-	ID=Cre01.g044400.t1.2.v5.5.five_prime_UTR.1;Parent=Cre01.g044400.t1.2.v5.5;pacid=30788663	-3082
chromosome_17	3469610	3469611	12	+	chromosome_17	five_prime_UTR	3465853	3466531	-	ID=Cre17.g724873.t1.2.v5.5.five_prime_UTR.1;Parent=Cre17.g724873.t1.2.v5.5;pacid=30782512	-3080
chromosome_5	3367080	3367081	25	+	chromosome_5	five_prime_UTR	3363855	3364009	-	ID=Cre05.g240800.t1.2.v5.5.five_prime_UTR.1;Parent=Cre05.g240800.t1.2.v5.5;pacid=30782961	-3072
chromosome_5	3367079	3367080	11	+	chromosome_5	five_prime_UTR	3363855	3364009	-	ID=Cre05.g240800.t1.2.v5.5.five_prime_UTR.1;Parent=Cre05.g240800.t1.2.v5.5;pacid=30782961	-3071
chromosome_11	2194305	2194306	15	-	chromosome_11	five_prime_UTR	2197363	2197480	+	ID=Cre11.g472226.t1.1.v5.5.five_prime_UTR.1;Parent=Cre11.g472226.t1.1.v5.5;pacid=30775813	-3057
chromosome_15	1818177	1818178	64	-	chromosome_15	five_prime_UTR	1821138	1821610	+	ID=Cre15.g643385.t1.1.v5.5.five_prime_UTR.1;Parent=Cre15.g643385.t1.1.v5.5;pacid=30783635	-2960
chromosome_15	1818179	1818180	30	-	chromosome_15	five_prime_UTR	1821138	1821610	+	ID=Cre15.g643385.t1.1.v5.5.five_prime_UTR.1;Parent=Cre15.g643385.t1.1.v5.5;pacid=30783635	-2958
chromosome_7	599646	599647	17	-	chromosome_7	five_prime_UTR	602581	602819	+	ID=Cre07.g316850.t1.2.v5.5.five_prime_UTR.1;Parent=Cre07.g316850.t1.2.v5.5;pacid=30774860	-2934
chromosome_7	599647	599648	39	-	chromosome_7	five_prime_UTR	602581	602819	+	ID=Cre07.g316850.t1.2.v5.5.five_prime_UTR.1;Parent=Cre07.g316850.t1.2.v5.5;pacid=30774860	-2933
chromosome_7	599648	599649	22	-	chromosome_7	five_prime_UTR	602581	602819	+	ID=Cre07.g316850.t1.2.v5.5.five_prime_UTR.1;Parent=Cre07.g316850.t1.2.v5.5;pacid=30774860	-2932
chromosome_7	1249237	1249238	10	+	chromosome_7	five_prime_UTR	1245805	1246321	-	ID=Cre07.g321400.t1.1.v5.5.five_prime_UTR.1;Parent=Cre07.g321400.t1.1.v5.5;pacid=30774910	-2917
chromosome_7	599667	599668	12	-	chromosome_7	five_prime_UTR	602581	602819	+	ID=Cre07.g316850.t1.2.v5.5.five_prime_UTR.1;Parent=Cre07.g316850.t1.2.v5.5;pacid=30774860	-2913
chromosome_1	4291207	4291208	18	-	chromosome_1	five_prime_UTR	4294103	4294195	+	ID=Cre01.g028900.t1.1.v5.5.five_prime_UTR.1;Parent=Cre01.g028900.t1.1.v5.5;pacid=30788324	-2895
chromosome_1	4291209	4291210	53	-	chromosome_1	five_prime_UTR	4294103	4294195	+	ID=Cre01.g028900.t1.1.v5.5.five_prime_UTR.1;Parent=Cre01.g028900.t1.1.v5.5;pacid=30788324	-2893
chromosome_1	4291213	4291214	32	-	chromosome_1	five_prime_UTR	4294103	4294195	+	ID=Cre01.g028900.t1.1.v5.5.five_prime_UTR.1;Parent=Cre01.g028900.t1.1.v5.5;pacid=30788324	-2889
chromosome_1	4291222	4291223	10	-	chromosome_1	five_prime_UTR	4294103	4294195	+	ID=Cre01.g028900.t1.1.v5.5.five_prime_UTR.1;Parent=Cre01.g028900.t1.1.v5.5;pacid=30788324	-2880
chromosome_1	4291223	4291224	27	-	chromosome_1	five_prime_UTR	4294103	4294195	+	ID=Cre01.g028900.t1.1.v5.5.five_prime_UTR.1;Parent=Cre01.g028900.t1.1.v5.5;pacid=30788324	-2879
chromosome_1	4291224	4291225	25	-	chromosome_1	five_prime_UTR	4294103	4294195	+	ID=Cre01.g028900.t1.1.v5.5.five_prime_UTR.1;Parent=Cre01.g028900.t1.1.v5.5;pacid=30788324	-2878
chromosome_5	2004906	2004907	11	+	chromosome_5	five_prime_UTR	2001663	2002048	-	ID=Cre05.g241647.t1.1.v5.5.five_prime_UTR.1;Parent=Cre05.g241647.t1.1.v5.5;pacid=30783380	-2859
chromosome_5	2004902	2004903	13	+	chromosome_5	five_prime_UTR	2001663	2002048	-	ID=Cre05.g241647.t1.1.v5.5.five_prime_UTR.1;Parent=Cre05.g241647.t1.1.v5.5;pacid=30783380	-2855
chromosome_1	5696226	5696227	11	+	chromosome_1	five_prime_UTR	5693292	5693397	-	ID=Cre01.g040550.t1.1.v5.5.five_prime_UTR.1;Parent=Cre01.g040550.t1.1.v5.5;pacid=30789418	-2830
chromosome_17	1193330	1193331	36	-	chromosome_17	five_prime_UTR	1196139	1196391	+	ID=Cre17.g704950.t1.1.v5.5.five_prime_UTR.1;Parent=Cre17.g704950.t1.1.v5.5;pacid=30782404	-2808
chromosome_17	1193332	1193333	149	-	chromosome_17	five_prime_UTR	1196139	1196391	+	ID=Cre17.g704950.t1.1.v5.5.five_prime_UTR.1;Parent=Cre17.g704950.t1.1.v5.5;pacid=30782404	-2806
chromosome_17	1193334	1193335	84	-	chromosome_17	five_prime_UTR	1196139	1196391	+	ID=Cre17.g704950.t1.1.v5.5.five_prime_UTR.1;Parent=Cre17.g704950.t1.1.v5.5;pacid=30782404	-2804
chromosome_17	1193335	1193336	43	-	chromosome_17	five_prime_UTR	1196139	1196391	+	ID=Cre17.g704950.t1.1.v5.5.five_prime_UTR.1;Parent=Cre17.g704950.t1.1.v5.5;pacid=30782404	-2803
chromosome_17	1193336	1193337	234	-	chromosome_17	five_prime_UTR	1196139	1196391	+	ID=Cre17.g704950.t1.1.v5.5.five_prime_UTR.1;Parent=Cre17.g704950.t1.1.v5.5;pacid=30782404	-2802
chromosome_17	1193337	1193338	32	-	chromosome_17	five_prime_UTR	1196139	1196391	+	ID=Cre17.g704950.t1.1.v5.5.five_prime_UTR.1;Parent=Cre17.g704950.t1.1.v5.5;pacid=30782404	-2801
chromosome_17	1193338	1193339	18	-	chromosome_17	five_prime_UTR	1196139	1196391	+	ID=Cre17.g704950.t1.1.v5.5.five_prime_UTR.1;Parent=Cre17.g704950.t1.1.v5.5;pacid=30782404	-2800
chromosome_17	1193339	1193340	11	-	chromosome_17	five_prime_UTR	1196139	1196391	+	ID=Cre17.g704950.t1.1.v5.5.five_prime_UTR.1;Parent=Cre17.g704950.t1.1.v5.5;pacid=30782404	-2799
chromosome_17	1193341	1193342	12	-	chromosome_17	five_prime_UTR	1196139	1196391	+	ID=Cre17.g704950.t1.1.v5.5.five_prime_UTR.1;Parent=Cre17.g704950.t1.1.v5.5;pacid=30782404	-2797
chromosome_7	599839	599840	14	-	chromosome_7	five_prime_UTR	602581	602819	+	ID=Cre07.g316850.t1.2.v5.5.five_prime_UTR.1;Parent=Cre07.g316850.t1.2.v5.5;pacid=30774860	-2741
chromosome_7	599855	599856	46	-	chromosome_7	five_prime_UTR	602581	602819	+	ID=Cre07.g316850.t1.2.v5.5.five_prime_UTR.1;Parent=Cre07.g316850.t1.2.v5.5;pacid=30774860	-2725
chromosome_7	599860	599861	49	-	chromosome_7	five_prime_UTR	602581	602819	+	ID=Cre07.g316850.t1.2.v5.5.five_prime_UTR.1;Parent=Cre07.g316850.t1.2.v5.5;pacid=30774860	-2720
chromosome_7	599862	599863	12	-	chromosome_7	five_prime_UTR	602581	602819	+	ID=Cre07.g316850.t1.2.v5.5.five_prime_UTR.1;Parent=Cre07.g316850.t1.2.v5.5;pacid=30774860	-2718
chromosome_7	599863	599864	24	-	chromosome_7	five_prime_UTR	602581	602819	+	ID=Cre07.g316850.t1.2.v5.5.five_prime_UTR.1;Parent=Cre07.g316850.t1.2.v5.5;pacid=30774860	-2717
chromosome_7	599880	599881	52	-	chromosome_7	five_prime_UTR	602581	602819	+	ID=Cre07.g316850.t1.2.v5.5.five_prime_UTR.1;Parent=Cre07.g316850.t1.2.v5.5;pacid=30774860	-2700
chromosome_2	734911	734912	37	+	chromosome_2	five_prime_UTR	731921	732216	-	ID=Cre02.g078450.t1.1.v5.5.five_prime_UTR.1;Parent=Cre02.g078450.t1.1.v5.5;pacid=30786446	-2696
chromosome_8	3396983	3396984	30	+	chromosome_8	five_prime_UTR	3394225	3394326	-	ID=Cre08.g374436.t1.2.v5.5.five_prime_UTR.1;Parent=Cre08.g374436.t1.2.v5.5;pacid=30773431	-2658
chromosome_8	3396981	3396982	27	+	chromosome_8	five_prime_UTR	3394225	3394326	-	ID=Cre08.g374436.t1.2.v5.5.five_prime_UTR.1;Parent=Cre08.g374436.t1.2.v5.5;pacid=30773431	-2656
chromosome_11	2194728	2194729	14	-	chromosome_11	five_prime_UTR	2197363	2197480	+	ID=Cre11.g472226.t1.1.v5.5.five_prime_UTR.1;Parent=Cre11.g472226.t1.1.v5.5;pacid=30775813	-2634
chromosome_11	2194730	2194731	11	-	chromosome_11	five_prime_UTR	2197363	2197480	+	ID=Cre11.g472226.t1.1.v5.5.five_prime_UTR.1;Parent=Cre11.g472226.t1.1.v5.5;pacid=30775813	-2632
chromosome_16	7707612	7707613	49	-	chromosome_16	five_prime_UTR	7710240	7710433	+	ID=Cre16.g691103.t1.1.v5.5.five_prime_UTR.1;Parent=Cre16.g691103.t1.1.v5.5;pacid=30777586	-2627
chromosome_scaffold_28	30352	30353	11	-	chromosome_scaffold_28	five_prime_UTR	32976	33374	+	ID=Cre28.g757747.t1.1.v5.5.five_prime_UTR.1;Parent=Cre28.g757747.t1.1.v5.5;pacid=30782924	-2623
chromosome_6	3703742	3703743	29	+	chromosome_6	five_prime_UTR	3700703	3701162	-	ID=Cre06.g278143.t1.1.v5.5.five_prime_UTR.1;Parent=Cre06.g278143.t1.1.v5.5;pacid=30778741	-2581
chromosome_12	7679585	7679586	36	-	chromosome_12	five_prime_UTR	7682131	7682811	+	ID=Cre12.g554200.t1.1.v5.5.five_prime_UTR.1;Parent=Cre12.g554200.t1.1.v5.5;pacid=30792457	-2545
chromosome_6	5452191	5452192	10	-	chromosome_6	five_prime_UTR	5454736	5454929	+	ID=Cre06.g284400.t1.2.v5.5.five_prime_UTR.1;Parent=Cre06.g284400.t1.2.v5.5;pacid=30779829	-2544
chromosome_6	5452192	5452193	28	-	chromosome_6	five_prime_UTR	5454736	5454929	+	ID=Cre06.g284400.t1.2.v5.5.five_prime_UTR.1;Parent=Cre06.g284400.t1.2.v5.5;pacid=30779829	-2543
chromosome_6	5452193	5452194	19	-	chromosome_6	five_prime_UTR	5454736	5454929	+	ID=Cre06.g284400.t1.2.v5.5.five_prime_UTR.1;Parent=Cre06.g284400.t1.2.v5.5;pacid=30779829	-2542
chromosome_6	5452194	5452195	28	-	chromosome_6	five_prime_UTR	5454736	5454929	+	ID=Cre06.g284400.t1.2.v5.5.five_prime_UTR.1;Parent=Cre06.g284400.t1.2.v5.5;pacid=30779829	-2541
chromosome_6	5452195	5452196	18	-	chromosome_6	five_prime_UTR	5454736	5454929	+	ID=Cre06.g284400.t1.2.v5.5.five_prime_UTR.1;Parent=Cre06.g284400.t1.2.v5.5;pacid=30779829	-2540
chromosome_6	5452201	5452202	11	-	chromosome_6	five_prime_UTR	5454736	5454929	+	ID=Cre06.g284400.t1.2.v5.5.five_prime_UTR.1;Parent=Cre06.g284400.t1.2.v5.5;pacid=30779829	-2534
chromosome_7	5015760	5015761	11	+	chromosome_7	five_prime_UTR	5012582	5013275	-	ID=Cre07.g347000.t1.1.v5.5.five_prime_UTR.1;Parent=Cre07.g347000.t1.1.v5.5;pacid=30774811	-2486
chromosome_7	600096	600097	30	-	chromosome_7	five_prime_UTR	602581	602819	+	ID=Cre07.g316850.t1.2.v5.5.five_prime_UTR.1;Parent=Cre07.g316850.t1.2.v5.5;pacid=30774860	-2484
chromosome_1	7354324	7354325	13	-	chromosome_1	five_prime_UTR	7356808	7357189	+	ID=Cre01.g052850.t1.1.v5.5.five_prime_UTR.1;Parent=Cre01.g052850.t1.1.v5.5;pacid=30789312	-2483
chromosome_1	7354325	7354326	10	-	chromosome_1	five_prime_UTR	7356808	7357189	+	ID=Cre01.g052850.t1.1.v5.5.five_prime_UTR.1;Parent=Cre01.g052850.t1.1.v5.5;pacid=30789312	-2482
chromosome_2	8863840	8863841	29	+	chromosome_2	five_prime_UTR	8860945	8861408	-	ID=Cre02.g142647.t1.1.v5.5.five_prime_UTR.1;Parent=Cre02.g142647.t1.1.v5.5;pacid=30785511	-2433
chromosome_2	8863839	8863840	69	+	chromosome_2	five_prime_UTR	8860945	8861408	-	ID=Cre02.g142647.t1.1.v5.5.five_prime_UTR.1;Parent=Cre02.g142647.t1.1.v5.5;pacid=30785511	-2432
chromosome_6	7573985	7573986	10	-	chromosome_6	five_prime_UTR	7576410	7576614	+	ID=Cre06.g300933.t1.1.v5.5.five_prime_UTR.1;Parent=Cre06.g300933.t1.1.v5.5;pacid=30779866	-2424
chromosome_1	2982543	2982544	13	+	chromosome_1	five_prime_UTR	2979864	2980126	-	ID=Cre01.g018200.t1.1.v5.5.five_prime_UTR.1;Parent=Cre01.g018200.t1.1.v5.5;pacid=30788680	-2418
chromosome_6	7573997	7573998	46	-	chromosome_6	five_prime_UTR	7576410	7576614	+	ID=Cre06.g300933.t1.1.v5.5.five_prime_UTR.1;Parent=Cre06.g300933.t1.1.v5.5;pacid=30779866	-2412
chromosome_14	4146373	4146374	11	+	chromosome_14	five_prime_UTR	4143636	4143965	-	ID=Cre14.g634236.t1.1.v5.5.five_prime_UTR.1;Parent=Cre14.g634236.t1.1.v5.5;pacid=30776576	-2409
chromosome_3	3154264	3154265	10	+	chromosome_3	five_prime_UTR	3151732	3151876	-	ID=Cre03.g165169.t1.1.v5.5.five_prime_UTR.1;Parent=Cre03.g165169.t1.1.v5.5;pacid=30787214	-2389
chromosome_1	2982513	2982514	56	+	chromosome_1	five_prime_UTR	2979864	2980126	-	ID=Cre01.g018200.t1.1.v5.5.five_prime_UTR.1;Parent=Cre01.g018200.t1.1.v5.5;pacid=30788680	-2388
chromosome_1	2982512	2982513	12	+	chromosome_1	five_prime_UTR	2979864	2980126	-	ID=Cre01.g018200.t1.1.v5.5.five_prime_UTR.1;Parent=Cre01.g018200.t1.1.v5.5;pacid=30788680	-2387
chromosome_3	3154262	3154263	81	+	chromosome_3	five_prime_UTR	3151732	3151876	-	ID=Cre03.g165169.t1.1.v5.5.five_prime_UTR.1;Parent=Cre03.g165169.t1.1.v5.5;pacid=30787214	-2387
chromosome_1	2982511	2982512	22	+	chromosome_1	five_prime_UTR	2979864	2980126	-	ID=Cre01.g018200.t1.1.v5.5.five_prime_UTR.1;Parent=Cre01.g018200.t1.1.v5.5;pacid=30788680	-2386
chromosome_1	2982510	2982511	128	+	chromosome_1	five_prime_UTR	2979864	2980126	-	ID=Cre01.g018200.t1.1.v5.5.five_prime_UTR.1;Parent=Cre01.g018200.t1.1.v5.5;pacid=30788680	-2385
chromosome_1	2982503	2982504	31	+	chromosome_1	five_prime_UTR	2979864	2980126	-	ID=Cre01.g018200.t1.1.v5.5.five_prime_UTR.1;Parent=Cre01.g018200.t1.1.v5.5;pacid=30788680	-2378
chromosome_12	6353811	6353812	14	-	chromosome_12	five_prime_UTR	6356183	6356298	+	ID=Cre12.g537500.t1.1.v5.5.five_prime_UTR.1;Parent=Cre12.g537500.t1.1.v5.5;pacid=30792256	-2371
chromosome_15	1915574	1915575	23	-	chromosome_15	five_prime_UTR	1917928	1918655	+	ID=Cre15.g643050.t1.2.v5.5.five_prime_UTR.1;Parent=Cre15.g643050.t1.2.v5.5;pacid=30783664	-2353
chromosome_15	1915575	1915576	33	-	chromosome_15	five_prime_UTR	1917928	1918655	+	ID=Cre15.g643050.t1.2.v5.5.five_prime_UTR.1;Parent=Cre15.g643050.t1.2.v5.5;pacid=30783664	-2352
chromosome_15	1915576	1915577	111	-	chromosome_15	five_prime_UTR	1917928	1918655	+	ID=Cre15.g643050.t1.2.v5.5.five_prime_UTR.1;Parent=Cre15.g643050.t1.2.v5.5;pacid=30783664	-2351
chromosome_15	1915577	1915578	612	-	chromosome_15	five_prime_UTR	1917928	1918655	+	ID=Cre15.g643050.t1.2.v5.5.five_prime_UTR.1;Parent=Cre15.g643050.t1.2.v5.5;pacid=30783664	-2350
chromosome_15	1915579	1915580	22	-	chromosome_15	five_prime_UTR	1917928	1918655	+	ID=Cre15.g643050.t1.2.v5.5.five_prime_UTR.1;Parent=Cre15.g643050.t1.2.v5.5;pacid=30783664	-2348
chromosome_1	2982379	2982380	13	+	chromosome_1	five_prime_UTR	2979864	2980126	-	ID=Cre01.g018200.t1.1.v5.5.five_prime_UTR.1;Parent=Cre01.g018200.t1.1.v5.5;pacid=30788680	-2254
chromosome_3	2410506	2410507	26	-	chromosome_3	five_prime_UTR	2412741	2412867	+	ID=Cre03.g159083.t1.2.v5.5.five_prime_UTR.1;Parent=Cre03.g159083.t1.2.v5.5;pacid=30788148	-2234
chromosome_3	2410508	2410509	13	-	chromosome_3	five_prime_UTR	2412741	2412867	+	ID=Cre03.g159083.t1.2.v5.5.five_prime_UTR.1;Parent=Cre03.g159083.t1.2.v5.5;pacid=30788148	-2232
chromosome_3	2410510	2410511	30	-	chromosome_3	five_prime_UTR	2412741	2412867	+	ID=Cre03.g159083.t1.2.v5.5.five_prime_UTR.1;Parent=Cre03.g159083.t1.2.v5.5;pacid=30788148	-2230
chromosome_14	2573980	2573981	120	+	chromosome_14	five_prime_UTR	2571523	2571765	-	ID=Cre14.g625625.t1.1.v5.5.five_prime_UTR.1;Parent=Cre14.g625625.t1.1.v5.5;pacid=30776209	-2216
chromosome_14	2573979	2573980	12	+	chromosome_14	five_prime_UTR	2571523	2571765	-	ID=Cre14.g625625.t1.1.v5.5.five_prime_UTR.1;Parent=Cre14.g625625.t1.1.v5.5;pacid=30776209	-2215
chromosome_14	2573978	2573979	106	+	chromosome_14	five_prime_UTR	2571523	2571765	-	ID=Cre14.g625625.t1.1.v5.5.five_prime_UTR.1;Parent=Cre14.g625625.t1.1.v5.5;pacid=30776209	-2214
chromosome_11	2195149	2195150	13	-	chromosome_11	five_prime_UTR	2197363	2197480	+	ID=Cre11.g472226.t1.1.v5.5.five_prime_UTR.1;Parent=Cre11.g472226.t1.1.v5.5;pacid=30775813	-2213
chromosome_14	2573976	2573977	19	+	chromosome_14	five_prime_UTR	2571523	2571765	-	ID=Cre14.g625625.t1.1.v5.5.five_prime_UTR.1;Parent=Cre14.g625625.t1.1.v5.5;pacid=30776209	-2212
chromosome_scaffold_21	165507	165508	12	-	chromosome_scaffold_21	five_prime_UTR	167716	167807	+	ID=Cre21.g753197.t1.1.v5.5.five_prime_UTR.1;Parent=Cre21.g753197.t1.1.v5.5;pacid=30791640	-2208
chromosome_3	7149472	7149473	10	-	chromosome_3	five_prime_UTR	7151676	7152451	+	ID=Cre03.g208300.t1.2.v5.5.five_prime_UTR.1;Parent=Cre03.g208300.t1.2.v5.5;pacid=30787012	-2203
chromosome_14	2672768	2672769	19	-	chromosome_14	five_prime_UTR	2674941	2675085	+	ID=Cre14.g626500.t1.2.v5.5.five_prime_UTR.1;Parent=Cre14.g626500.t1.2.v5.5;pacid=30776084	-2172
chromosome_11	2633492	2633493	11	+	chromosome_11	five_prime_UTR	2631238	2631344	-	ID=Cre11.g476400.t1.1.v5.5.five_prime_UTR.1;Parent=Cre11.g476400.t1.1.v5.5;pacid=30775552	-2149
chromosome_2	322324	322325	19	+	chromosome_2	five_prime_UTR	320096	320189	-	ID=Cre02.g075400.t1.1.v5.5.five_prime_UTR.1;Parent=Cre02.g075400.t1.1.v5.5;pacid=30785918	-2136
chromosome_3	2218214	2218215	10	+	chromosome_3	five_prime_UTR	2215826	2216079	-	ID=Cre03.g157550.t1.2.v5.5.five_prime_UTR.1;Parent=Cre03.g157550.t1.2.v5.5;pacid=30788092	-2136
chromosome_15	1056122	1056123	12	-	chromosome_15	five_prime_UTR	1058253	1058328	+	ID=Cre15.g638500.t1.2.v5.5.five_prime_UTR.1;Parent=Cre15.g638500.t1.2.v5.5;pacid=30783696	-2130
chromosome_15	1056126	1056127	14	-	chromosome_15	five_prime_UTR	1058253	1058328	+	ID=Cre15.g638500.t1.2.v5.5.five_prime_UTR.1;Parent=Cre15.g638500.t1.2.v5.5;pacid=30783696	-2126
chromosome_15	1056127	1056128	19	-	chromosome_15	five_prime_UTR	1058253	1058328	+	ID=Cre15.g638500.t1.2.v5.5.five_prime_UTR.1;Parent=Cre15.g638500.t1.2.v5.5;pacid=30783696	-2125
chromosome_15	1056128	1056129	11	-	chromosome_15	five_prime_UTR	1058253	1058328	+	ID=Cre15.g638500.t1.2.v5.5.five_prime_UTR.1;Parent=Cre15.g638500.t1.2.v5.5;pacid=30783696	-2124
chromosome_15	1056129	1056130	18	-	chromosome_15	five_prime_UTR	1058253	1058328	+	ID=Cre15.g638500.t1.2.v5.5.five_prime_UTR.1;Parent=Cre15.g638500.t1.2.v5.5;pacid=30783696	-2123
chromosome_15	1056130	1056131	14	-	chromosome_15	five_prime_UTR	1058253	1058328	+	ID=Cre15.g638500.t1.2.v5.5.five_prime_UTR.1;Parent=Cre15.g638500.t1.2.v5.5;pacid=30783696	-2122
chromosome_15	1056131	1056132	14	-	chromosome_15	five_prime_UTR	1058253	1058328	+	ID=Cre15.g638500.t1.2.v5.5.five_prime_UTR.1;Parent=Cre15.g638500.t1.2.v5.5;pacid=30783696	-2121
chromosome_15	1056132	1056133	50	-	chromosome_15	five_prime_UTR	1058253	1058328	+	ID=Cre15.g638500.t1.2.v5.5.five_prime_UTR.1;Parent=Cre15.g638500.t1.2.v5.5;pacid=30783696	-2120
chromosome_scaffold_21	125586	125587	121	+	chromosome_scaffold_21	five_prime_UTR	123024	123485	-	ID=Cre21.g753047.t1.1.v5.5.five_prime_UTR.1;Parent=Cre21.g753047.t1.1.v5.5;pacid=30791645	-2102
chromosome_scaffold_21	125585	125586	63	+	chromosome_scaffold_21	five_prime_UTR	123024	123485	-	ID=Cre21.g753047.t1.1.v5.5.five_prime_UTR.1;Parent=Cre21.g753047.t1.1.v5.5;pacid=30791645	-2101
chromosome_scaffold_21	125584	125585	177	+	chromosome_scaffold_21	five_prime_UTR	123024	123485	-	ID=Cre21.g753047.t1.1.v5.5.five_prime_UTR.1;Parent=Cre21.g753047.t1.1.v5.5;pacid=30791645	-2100
chromosome_scaffold_21	125583	125584	14	+	chromosome_scaffold_21	five_prime_UTR	123024	123485	-	ID=Cre21.g753047.t1.1.v5.5.five_prime_UTR.1;Parent=Cre21.g753047.t1.1.v5.5;pacid=30791645	-2099
chromosome_scaffold_21	125581	125582	12	+	chromosome_scaffold_21	five_prime_UTR	123024	123485	-	ID=Cre21.g753047.t1.1.v5.5.five_prime_UTR.1;Parent=Cre21.g753047.t1.1.v5.5;pacid=30791645	-2097
chromosome_scaffold_21	125580	125581	14	+	chromosome_scaffold_21	five_prime_UTR	123024	123485	-	ID=Cre21.g753047.t1.1.v5.5.five_prime_UTR.1;Parent=Cre21.g753047.t1.1.v5.5;pacid=30791645	-2096
chromosome_1	3286106	3286107	43	+	chromosome_1	five_prime_UTR	3283337	3284026	-	ID=Cre01.g020751.t1.2.v5.5.five_prime_UTR.1;Parent=Cre01.g020751.t1.2.v5.5;pacid=30789634	-2081
chromosome_9	51368	51369	11	-	chromosome_9	five_prime_UTR	53436	53479	+	ID=Cre09.g386161.t1.1.v5.5.five_prime_UTR.1;Parent=Cre09.g386161.t1.1.v5.5;pacid=30780968	-2067
chromosome_17	7041017	7041018	12	-	chromosome_17	five_prime_UTR	7043066	7043165	+	ID=Cre17.g746747.t1.1.v5.5.five_prime_UTR.1;Parent=Cre17.g746747.t1.1.v5.5;pacid=30781690	-2048
chromosome_17	7041019	7041020	10	-	chromosome_17	five_prime_UTR	7043066	7043165	+	ID=Cre17.g746747.t1.1.v5.5.five_prime_UTR.1;Parent=Cre17.g746747.t1.1.v5.5;pacid=30781690	-2046
chromosome_17	7041021	7041022	12	-	chromosome_17	five_prime_UTR	7043066	7043165	+	ID=Cre17.g746747.t1.1.v5.5.five_prime_UTR.1;Parent=Cre17.g746747.t1.1.v5.5;pacid=30781690	-2044
chromosome_16	6272667	6272668	14	+	chromosome_16	five_prime_UTR	6270501	6270625	-	ID=Cre16.g674850.t1.1.v5.5.five_prime_UTR.1;Parent=Cre16.g674850.t1.1.v5.5;pacid=30778015	-2043
chromosome_16	6272665	6272666	31	+	chromosome_16	five_prime_UTR	6270501	6270625	-	ID=Cre16.g674850.t1.1.v5.5.five_prime_UTR.1;Parent=Cre16.g674850.t1.1.v5.5;pacid=30778015	-2041
chromosome_12	2506242	2506243	10	+	chromosome_12	five_prime_UTR	2504102	2504232	-	ID=Cre12.g506500.t1.2.v5.5.five_prime_UTR.1;Parent=Cre12.g506500.t1.2.v5.5;pacid=30792666	-2011
chromosome_10	2357353	2357354	18	-	chromosome_10	five_prime_UTR	2359363	2359639	+	ID=Cre10.g435050.t1.1.v5.5.five_prime_UTR.1;Parent=Cre10.g435050.t1.1.v5.5;pacid=30790281	-2009
chromosome_3	799167	799168	11	+	chromosome_3	five_prime_UTR	797145	797183	-	ID=Cre03.g146367.t1.1.v5.5.five_prime_UTR.1;Parent=Cre03.g146367.t1.1.v5.5;pacid=30787832	-1985
chromosome_3	799166	799167	53	+	chromosome_3	five_prime_UTR	797145	797183	-	ID=Cre03.g146367.t1.1.v5.5.five_prime_UTR.1;Parent=Cre03.g146367.t1.1.v5.5;pacid=30787832	-1984
chromosome_3	799164	799165	52	+	chromosome_3	five_prime_UTR	797145	797183	-	ID=Cre03.g146367.t1.1.v5.5.five_prime_UTR.1;Parent=Cre03.g146367.t1.1.v5.5;pacid=30787832	-1982
chromosome_9	7568453	7568454	24	-	chromosome_9	five_prime_UTR	7570418	7570695	+	ID=Cre09.g414416.t1.1.v5.5.five_prime_UTR.1;Parent=Cre09.g414416.t1.1.v5.5;pacid=30780675	-1964
chromosome_9	7568455	7568456	18	-	chromosome_9	five_prime_UTR	7570418	7570695	+	ID=Cre09.g414416.t1.1.v5.5.five_prime_UTR.1;Parent=Cre09.g414416.t1.1.v5.5;pacid=30780675	-1962
chromosome_3	2218013	2218014	16	+	chromosome_3	five_prime_UTR	2215826	2216079	-	ID=Cre03.g157550.t1.2.v5.5.five_prime_UTR.1;Parent=Cre03.g157550.t1.2.v5.5;pacid=30788092	-1935
chromosome_3	2218008	2218009	39	+	chromosome_3	five_prime_UTR	2215826	2216079	-	ID=Cre03.g157550.t1.2.v5.5.five_prime_UTR.1;Parent=Cre03.g157550.t1.2.v5.5;pacid=30788092	-1930
chromosome_3	2218004	2218005	14	+	chromosome_3	five_prime_UTR	2215826	2216079	-	ID=Cre03.g157550.t1.2.v5.5.five_prime_UTR.1;Parent=Cre03.g157550.t1.2.v5.5;pacid=30788092	-1926
chromosome_3	2218002	2218003	72	+	chromosome_3	five_prime_UTR	2215826	2216079	-	ID=Cre03.g157550.t1.2.v5.5.five_prime_UTR.1;Parent=Cre03.g157550.t1.2.v5.5;pacid=30788092	-1924
chromosome_3	2218001	2218002	48	+	chromosome_3	five_prime_UTR	2215826	2216079	-	ID=Cre03.g157550.t1.2.v5.5.five_prime_UTR.1;Parent=Cre03.g157550.t1.2.v5.5;pacid=30788092	-1923
chromosome_3	2217999	2218000	10	+	chromosome_3	five_prime_UTR	2215826	2216079	-	ID=Cre03.g157550.t1.2.v5.5.five_prime_UTR.1;Parent=Cre03.g157550.t1.2.v5.5;pacid=30788092	-1921
chromosome_3	2217998	2217999	10	+	chromosome_3	five_prime_UTR	2215826	2216079	-	ID=Cre03.g157550.t1.2.v5.5.five_prime_UTR.1;Parent=Cre03.g157550.t1.2.v5.5;pacid=30788092	-1920
chromosome_7	4629150	4629151	139	+	chromosome_7	five_prime_UTR	4627032	4627252	-	ID=Cre07.g344250.t1.1.v5.5.five_prime_UTR.1;Parent=Cre07.g344250.t1.1.v5.5;pacid=30775016	-1899
chromosome_6	7574517	7574518	15	-	chromosome_6	five_prime_UTR	7576410	7576614	+	ID=Cre06.g300933.t1.1.v5.5.five_prime_UTR.1;Parent=Cre06.g300933.t1.1.v5.5;pacid=30779866	-1892
chromosome_6	7574518	7574519	30	-	chromosome_6	five_prime_UTR	7576410	7576614	+	ID=Cre06.g300933.t1.1.v5.5.five_prime_UTR.1;Parent=Cre06.g300933.t1.1.v5.5;pacid=30779866	-1891
chromosome_6	7574519	7574520	15	-	chromosome_6	five_prime_UTR	7576410	7576614	+	ID=Cre06.g300933.t1.1.v5.5.five_prime_UTR.1;Parent=Cre06.g300933.t1.1.v5.5;pacid=30779866	-1890
chromosome_13	1156523	1156524	15	+	chromosome_13	five_prime_UTR	1154301	1154635	-	ID=Cre13.g569600.t1.2.v5.5.five_prime_UTR.1;Parent=Cre13.g569600.t1.2.v5.5;pacid=30784583	-1889
chromosome_13	1156514	1156515	16	+	chromosome_13	five_prime_UTR	1154301	1154635	-	ID=Cre13.g569600.t1.2.v5.5.five_prime_UTR.1;Parent=Cre13.g569600.t1.2.v5.5;pacid=30784583	-1880
chromosome_13	1156512	1156513	305	+	chromosome_13	five_prime_UTR	1154301	1154635	-	ID=Cre13.g569600.t1.2.v5.5.five_prime_UTR.1;Parent=Cre13.g569600.t1.2.v5.5;pacid=30784583	-1878
chromosome_6	7574531	7574532	14	-	chromosome_6	five_prime_UTR	7576410	7576614	+	ID=Cre06.g300933.t1.1.v5.5.five_prime_UTR.1;Parent=Cre06.g300933.t1.1.v5.5;pacid=30779866	-1878
chromosome_13	1156511	1156512	200	+	chromosome_13	five_prime_UTR	1154301	1154635	-	ID=Cre13.g569600.t1.2.v5.5.five_prime_UTR.1;Parent=Cre13.g569600.t1.2.v5.5;pacid=30784583	-1877
chromosome_13	1156510	1156511	626	+	chromosome_13	five_prime_UTR	1154301	1154635	-	ID=Cre13.g569600.t1.2.v5.5.five_prime_UTR.1;Parent=Cre13.g569600.t1.2.v5.5;pacid=30784583	-1876
chromosome_13	1156509	1156510	33	+	chromosome_13	five_prime_UTR	1154301	1154635	-	ID=Cre13.g569600.t1.2.v5.5.five_prime_UTR.1;Parent=Cre13.g569600.t1.2.v5.5;pacid=30784583	-1875
chromosome_13	1156508	1156509	71	+	chromosome_13	five_prime_UTR	1154301	1154635	-	ID=Cre13.g569600.t1.2.v5.5.five_prime_UTR.1;Parent=Cre13.g569600.t1.2.v5.5;pacid=30784583	-1874
chromosome_6	4671083	4671084	11	-	chromosome_6	five_prime_UTR	4672941	4673013	+	ID=Cre06.g278288.t1.1.v5.5.five_prime_UTR.1;Parent=Cre06.g278288.t1.1.v5.5;pacid=30778966	-1857
chromosome_6	4671084	4671085	18	-	chromosome_6	five_prime_UTR	4672941	4673013	+	ID=Cre06.g278288.t1.1.v5.5.five_prime_UTR.1;Parent=Cre06.g278288.t1.1.v5.5;pacid=30778966	-1856
chromosome_6	4671085	4671086	16	-	chromosome_6	five_prime_UTR	4672941	4673013	+	ID=Cre06.g278288.t1.1.v5.5.five_prime_UTR.1;Parent=Cre06.g278288.t1.1.v5.5;pacid=30778966	-1855
chromosome_6	4671086	4671087	11	-	chromosome_6	five_prime_UTR	4672941	4673013	+	ID=Cre06.g278288.t1.1.v5.5.five_prime_UTR.1;Parent=Cre06.g278288.t1.1.v5.5;pacid=30778966	-1854
chromosome_7	6367998	6367999	12	+	chromosome_7	five_prime_UTR	6365764	6366172	-	ID=Cre07.g357500.t1.1.v5.5.five_prime_UTR.1;Parent=Cre07.g357500.t1.1.v5.5;pacid=30774966	-1827
chromosome_7	4629076	4629077	16	+	chromosome_7	five_prime_UTR	4627032	4627252	-	ID=Cre07.g344250.t1.1.v5.5.five_prime_UTR.1;Parent=Cre07.g344250.t1.1.v5.5;pacid=30775016	-1825
chromosome_7	4629075	4629076	40	+	chromosome_7	five_prime_UTR	4627032	4627252	-	ID=Cre07.g344250.t1.1.v5.5.five_prime_UTR.1;Parent=Cre07.g344250.t1.1.v5.5;pacid=30775016	-1824
chromosome_6	7574587	7574588	17	-	chromosome_6	five_prime_UTR	7576410	7576614	+	ID=Cre06.g300933.t1.1.v5.5.five_prime_UTR.1;Parent=Cre06.g300933.t1.1.v5.5;pacid=30779866	-1822
chromosome_10	2729503	2729504	15	+	chromosome_10	five_prime_UTR	2727599	2727684	-	ID=Cre10.g438300.t1.2.v5.5.five_prime_UTR.1;Parent=Cre10.g438300.t1.2.v5.5;pacid=30790367	-1820
chromosome_10	2729502	2729503	63	+	chromosome_10	five_prime_UTR	2727599	2727684	-	ID=Cre10.g438300.t1.2.v5.5.five_prime_UTR.1;Parent=Cre10.g438300.t1.2.v5.5;pacid=30790367	-1819
chromosome_9	2572803	2572804	10	+	chromosome_9	five_prime_UTR	2570957	2570999	-	ID=Cre09.g390700.t1.1.v5.5.five_prime_UTR.1;Parent=Cre09.g390700.t1.1.v5.5;pacid=30780614	-1805
chromosome_17	2204725	2204726	25	+	chromosome_17	five_prime_UTR	2202375	2202925	-	ID=Cre17.g713200.t1.1.v5.5.five_prime_UTR.1;Parent=Cre17.g713200.t1.1.v5.5;pacid=30782466	-1801
chromosome_scaffold_21	165970	165971	15	-	chromosome_scaffold_21	five_prime_UTR	167716	167807	+	ID=Cre21.g753197.t1.1.v5.5.five_prime_UTR.1;Parent=Cre21.g753197.t1.1.v5.5;pacid=30791640	-1745
chromosome_scaffold_21	165971	165972	31	-	chromosome_scaffold_21	five_prime_UTR	167716	167807	+	ID=Cre21.g753197.t1.1.v5.5.five_prime_UTR.1;Parent=Cre21.g753197.t1.1.v5.5;pacid=30791640	-1744
chromosome_11	3295475	3295476	10	-	chromosome_11	five_prime_UTR	3297196	3297692	+	ID=Cre11.g480132.t1.1.v5.5.five_prime_UTR.1;Parent=Cre11.g480132.t1.1.v5.5;pacid=30775470	-1720
chromosome_3	3524733	3524734	20	+	chromosome_3	five_prime_UTR	3522936	3523018	-	ID=Cre03.g167712.t1.1.v5.5.five_prime_UTR.1;Parent=Cre03.g167712.t1.1.v5.5;pacid=30788003	-1716
chromosome_3	3524732	3524733	28	+	chromosome_3	five_prime_UTR	3522936	3523018	-	ID=Cre03.g167712.t1.1.v5.5.five_prime_UTR.1;Parent=Cre03.g167712.t1.1.v5.5;pacid=30788003	-1715
chromosome_3	3524731	3524732	53	+	chromosome_3	five_prime_UTR	3522936	3523018	-	ID=Cre03.g167712.t1.1.v5.5.five_prime_UTR.1;Parent=Cre03.g167712.t1.1.v5.5;pacid=30788003	-1714
chromosome_3	3524729	3524730	38	+	chromosome_3	five_prime_UTR	3522936	3523018	-	ID=Cre03.g167712.t1.1.v5.5.five_prime_UTR.1;Parent=Cre03.g167712.t1.1.v5.5;pacid=30788003	-1712
chromosome_3	3524728	3524729	10	+	chromosome_3	five_prime_UTR	3522936	3523018	-	ID=Cre03.g167712.t1.1.v5.5.five_prime_UTR.1;Parent=Cre03.g167712.t1.1.v5.5;pacid=30788003	-1711
chromosome_17	2204588	2204589	10	+	chromosome_17	five_prime_UTR	2202375	2202925	-	ID=Cre17.g713200.t1.1.v5.5.five_prime_UTR.1;Parent=Cre17.g713200.t1.1.v5.5;pacid=30782466	-1664
chromosome_17	2204587	2204588	15	+	chromosome_17	five_prime_UTR	2202375	2202925	-	ID=Cre17.g713200.t1.1.v5.5.five_prime_UTR.1;Parent=Cre17.g713200.t1.1.v5.5;pacid=30782466	-1663
chromosome_14	4153131	4153132	12	-	chromosome_14	five_prime_UTR	4154776	4155163	+	ID=Cre14.g634365.t1.1.v5.5.five_prime_UTR.1;Parent=Cre14.g634365.t1.1.v5.5;pacid=30776651	-1644
chromosome_14	4153132	4153133	623	-	chromosome_14	five_prime_UTR	4154776	4155163	+	ID=Cre14.g634365.t1.1.v5.5.five_prime_UTR.1;Parent=Cre14.g634365.t1.1.v5.5;pacid=30776651	-1643
chromosome_16	3315033	3315034	16	+	chromosome_16	five_prime_UTR	3312847	3313405	-	ID=Cre16.g666627.t1.1.v5.5.five_prime_UTR.1;Parent=Cre16.g666627.t1.1.v5.5;pacid=30777698	-1629
chromosome_14	4153191	4153192	21	-	chromosome_14	five_prime_UTR	4154776	4155163	+	ID=Cre14.g634365.t1.1.v5.5.five_prime_UTR.1;Parent=Cre14.g634365.t1.1.v5.5;pacid=30776651	-1584
chromosome_14	4153194	4153195	28	-	chromosome_14	five_prime_UTR	4154776	4155163	+	ID=Cre14.g634365.t1.1.v5.5.five_prime_UTR.1;Parent=Cre14.g634365.t1.1.v5.5;pacid=30776651	-1581
chromosome_14	4153196	4153197	15	-	chromosome_14	five_prime_UTR	4154776	4155163	+	ID=Cre14.g634365.t1.1.v5.5.five_prime_UTR.1;Parent=Cre14.g634365.t1.1.v5.5;pacid=30776651	-1579
chromosome_14	4153200	4153201	107	-	chromosome_14	five_prime_UTR	4154776	4155163	+	ID=Cre14.g634365.t1.1.v5.5.five_prime_UTR.1;Parent=Cre14.g634365.t1.1.v5.5;pacid=30776651	-1575
chromosome_13	3543522	3543523	14	-	chromosome_13	five_prime_UTR	3545090	3545263	+	ID=Cre13.g588050.t1.2.v5.5.five_prime_UTR.1;Parent=Cre13.g588050.t1.2.v5.5;pacid=30783916	-1567
chromosome_5	2001944	2001945	51	-	chromosome_5	five_prime_UTR	2003509	2003541	+	ID=Cre05.g241648.t1.1.v5.5.five_prime_UTR.1;Parent=Cre05.g241648.t1.1.v5.5;pacid=30783079	-1564
chromosome_5	2001945	2001946	19	-	chromosome_5	five_prime_UTR	2003509	2003541	+	ID=Cre05.g241648.t1.1.v5.5.five_prime_UTR.1;Parent=Cre05.g241648.t1.1.v5.5;pacid=30783079	-1563
chromosome_5	2001946	2001947	45	-	chromosome_5	five_prime_UTR	2003509	2003541	+	ID=Cre05.g241648.t1.1.v5.5.five_prime_UTR.1;Parent=Cre05.g241648.t1.1.v5.5;pacid=30783079	-1562
chromosome_5	2001950	2001951	43	-	chromosome_5	five_prime_UTR	2003509	2003541	+	ID=Cre05.g241648.t1.1.v5.5.five_prime_UTR.1;Parent=Cre05.g241648.t1.1.v5.5;pacid=30783079	-1558
chromosome_5	2001952	2001953	27	-	chromosome_5	five_prime_UTR	2003509	2003541	+	ID=Cre05.g241648.t1.1.v5.5.five_prime_UTR.1;Parent=Cre05.g241648.t1.1.v5.5;pacid=30783079	-1556
chromosome_5	2001953	2001954	17	-	chromosome_5	five_prime_UTR	2003509	2003541	+	ID=Cre05.g241648.t1.1.v5.5.five_prime_UTR.1;Parent=Cre05.g241648.t1.1.v5.5;pacid=30783079	-1555
chromosome_5	2001954	2001955	34	-	chromosome_5	five_prime_UTR	2003509	2003541	+	ID=Cre05.g241648.t1.1.v5.5.five_prime_UTR.1;Parent=Cre05.g241648.t1.1.v5.5;pacid=30783079	-1554
chromosome_5	2001955	2001956	40	-	chromosome_5	five_prime_UTR	2003509	2003541	+	ID=Cre05.g241648.t1.1.v5.5.five_prime_UTR.1;Parent=Cre05.g241648.t1.1.v5.5;pacid=30783079	-1553
chromosome_5	2001956	2001957	20	-	chromosome_5	five_prime_UTR	2003509	2003541	+	ID=Cre05.g241648.t1.1.v5.5.five_prime_UTR.1;Parent=Cre05.g241648.t1.1.v5.5;pacid=30783079	-1552
chromosome_7	3986066	3986067	32	-	chromosome_7	five_prime_UTR	3987618	3987997	+	ID=Cre07.g339850.t1.1.v5.5.five_prime_UTR.1;Parent=Cre07.g339850.t1.1.v5.5;pacid=30775348	-1551
chromosome_7	3229497	3229498	62	-	chromosome_7	five_prime_UTR	3231034	3231207	+	ID=Cre07.g334100.t1.1.v5.5.five_prime_UTR.1;Parent=Cre07.g334100.t1.1.v5.5;pacid=30774260	-1536
chromosome_7	3229498	3229499	44	-	chromosome_7	five_prime_UTR	3231034	3231207	+	ID=Cre07.g334100.t1.1.v5.5.five_prime_UTR.1;Parent=Cre07.g334100.t1.1.v5.5;pacid=30774260	-1535
chromosome_7	3229499	3229500	135	-	chromosome_7	five_prime_UTR	3231034	3231207	+	ID=Cre07.g334100.t1.1.v5.5.five_prime_UTR.1;Parent=Cre07.g334100.t1.1.v5.5;pacid=30774260	-1534
chromosome_7	3229500	3229501	10	-	chromosome_7	five_prime_UTR	3231034	3231207	+	ID=Cre07.g334100.t1.1.v5.5.five_prime_UTR.1;Parent=Cre07.g334100.t1.1.v5.5;pacid=30774260	-1533
chromosome_16	3120426	3120427	13	-	chromosome_16	five_prime_UTR	3121946	3122031	+	ID=Cre16.g665650.t1.1.v5.5.five_prime_UTR.1;Parent=Cre16.g665650.t1.1.v5.5;pacid=30776979	-1519
chromosome_16	2429562	2429563	16	-	chromosome_16	five_prime_UTR	2431078	2431157	+	ID=Cre16.g660430.t1.1.v5.5.five_prime_UTR.1;Parent=Cre16.g660430.t1.1.v5.5;pacid=30777424	-1515
chromosome_10	2220763	2220764	18	+	chromosome_10	five_prime_UTR	2218795	2219252	-	ID=Cre10.g433950.t1.1.v5.5.five_prime_UTR.1;Parent=Cre10.g433950.t1.1.v5.5;pacid=30790936	-1512
chromosome_10	2220762	2220763	12	+	chromosome_10	five_prime_UTR	2218795	2219252	-	ID=Cre10.g433950.t1.1.v5.5.five_prime_UTR.1;Parent=Cre10.g433950.t1.1.v5.5;pacid=30790936	-1511
chromosome_14	4153264	4153265	33	-	chromosome_14	five_prime_UTR	4154776	4155163	+	ID=Cre14.g634365.t1.1.v5.5.five_prime_UTR.1;Parent=Cre14.g634365.t1.1.v5.5;pacid=30776651	-1511
chromosome_10	2220761	2220762	33	+	chromosome_10	five_prime_UTR	2218795	2219252	-	ID=Cre10.g433950.t1.1.v5.5.five_prime_UTR.1;Parent=Cre10.g433950.t1.1.v5.5;pacid=30790936	-1510
chromosome_14	4153265	4153266	67	-	chromosome_14	five_prime_UTR	4154776	4155163	+	ID=Cre14.g634365.t1.1.v5.5.five_prime_UTR.1;Parent=Cre14.g634365.t1.1.v5.5;pacid=30776651	-1510
chromosome_14	4153266	4153267	30	-	chromosome_14	five_prime_UTR	4154776	4155163	+	ID=Cre14.g634365.t1.1.v5.5.five_prime_UTR.1;Parent=Cre14.g634365.t1.1.v5.5;pacid=30776651	-1509
chromosome_14	4153267	4153268	70	-	chromosome_14	five_prime_UTR	4154776	4155163	+	ID=Cre14.g634365.t1.1.v5.5.five_prime_UTR.1;Parent=Cre14.g634365.t1.1.v5.5;pacid=30776651	-1508
chromosome_14	4153268	4153269	138	-	chromosome_14	five_prime_UTR	4154776	4155163	+	ID=Cre14.g634365.t1.1.v5.5.five_prime_UTR.1;Parent=Cre14.g634365.t1.1.v5.5;pacid=30776651	-1507
chromosome_10	2220757	2220758	16	+	chromosome_10	five_prime_UTR	2218795	2219252	-	ID=Cre10.g433950.t1.1.v5.5.five_prime_UTR.1;Parent=Cre10.g433950.t1.1.v5.5;pacid=30790936	-1506
chromosome_14	4153269	4153270	2047	-	chromosome_14	five_prime_UTR	4154776	4155163	+	ID=Cre14.g634365.t1.1.v5.5.five_prime_UTR.1;Parent=Cre14.g634365.t1.1.v5.5;pacid=30776651	-1506
chromosome_14	4153271	4153272	26	-	chromosome_14	five_prime_UTR	4154776	4155163	+	ID=Cre14.g634365.t1.1.v5.5.five_prime_UTR.1;Parent=Cre14.g634365.t1.1.v5.5;pacid=30776651	-1504
chromosome_7	2518714	2518715	78	+	chromosome_7	five_prime_UTR	2517019	2517213	-	ID=Cre07.g329600.t1.1.v5.5.five_prime_UTR.1;Parent=Cre07.g329600.t1.1.v5.5;pacid=30775176	-1502
chromosome_7	2518713	2518714	25	+	chromosome_7	five_prime_UTR	2517019	2517213	-	ID=Cre07.g329600.t1.1.v5.5.five_prime_UTR.1;Parent=Cre07.g329600.t1.1.v5.5;pacid=30775176	-1501
chromosome_7	2518712	2518713	90	+	chromosome_7	five_prime_UTR	2517019	2517213	-	ID=Cre07.g329600.t1.1.v5.5.five_prime_UTR.1;Parent=Cre07.g329600.t1.1.v5.5;pacid=30775176	-1500
chromosome_14	4153278	4153279	43	-	chromosome_14	five_prime_UTR	4154776	4155163	+	ID=Cre14.g634365.t1.1.v5.5.five_prime_UTR.1;Parent=Cre14.g634365.t1.1.v5.5;pacid=30776651	-1497
chromosome_14	4153291	4153292	28	-	chromosome_14	five_prime_UTR	4154776	4155163	+	ID=Cre14.g634365.t1.1.v5.5.five_prime_UTR.1;Parent=Cre14.g634365.t1.1.v5.5;pacid=30776651	-1484
chromosome_14	4153292	4153293	23	-	chromosome_14	five_prime_UTR	4154776	4155163	+	ID=Cre14.g634365.t1.1.v5.5.five_prime_UTR.1;Parent=Cre14.g634365.t1.1.v5.5;pacid=30776651	-1483
chromosome_14	4153293	4153294	393	-	chromosome_14	five_prime_UTR	4154776	4155163	+	ID=Cre14.g634365.t1.1.v5.5.five_prime_UTR.1;Parent=Cre14.g634365.t1.1.v5.5;pacid=30776651	-1482
chromosome_14	4153294	4153295	24	-	chromosome_14	five_prime_UTR	4154776	4155163	+	ID=Cre14.g634365.t1.1.v5.5.five_prime_UTR.1;Parent=Cre14.g634365.t1.1.v5.5;pacid=30776651	-1481
chromosome_14	4153295	4153296	33	-	chromosome_14	five_prime_UTR	4154776	4155163	+	ID=Cre14.g634365.t1.1.v5.5.five_prime_UTR.1;Parent=Cre14.g634365.t1.1.v5.5;pacid=30776651	-1480
chromosome_14	4153296	4153297	122	-	chromosome_14	five_prime_UTR	4154776	4155163	+	ID=Cre14.g634365.t1.1.v5.5.five_prime_UTR.1;Parent=Cre14.g634365.t1.1.v5.5;pacid=30776651	-1479
chromosome_5	2002029	2002030	14	-	chromosome_5	five_prime_UTR	2003509	2003541	+	ID=Cre05.g241648.t1.1.v5.5.five_prime_UTR.1;Parent=Cre05.g241648.t1.1.v5.5;pacid=30783079	-1479
chromosome_14	4153297	4153298	21	-	chromosome_14	five_prime_UTR	4154776	4155163	+	ID=Cre14.g634365.t1.1.v5.5.five_prime_UTR.1;Parent=Cre14.g634365.t1.1.v5.5;pacid=30776651	-1478
chromosome_5	2002030	2002031	70	-	chromosome_5	five_prime_UTR	2003509	2003541	+	ID=Cre05.g241648.t1.1.v5.5.five_prime_UTR.1;Parent=Cre05.g241648.t1.1.v5.5;pacid=30783079	-1478
chromosome_14	4153298	4153299	12	-	chromosome_14	five_prime_UTR	4154776	4155163	+	ID=Cre14.g634365.t1.1.v5.5.five_prime_UTR.1;Parent=Cre14.g634365.t1.1.v5.5;pacid=30776651	-1477
chromosome_14	4153299	4153300	37	-	chromosome_14	five_prime_UTR	4154776	4155163	+	ID=Cre14.g634365.t1.1.v5.5.five_prime_UTR.1;Parent=Cre14.g634365.t1.1.v5.5;pacid=30776651	-1476
chromosome_14	4153300	4153301	23	-	chromosome_14	five_prime_UTR	4154776	4155163	+	ID=Cre14.g634365.t1.1.v5.5.five_prime_UTR.1;Parent=Cre14.g634365.t1.1.v5.5;pacid=30776651	-1475
chromosome_5	2002033	2002034	61	-	chromosome_5	five_prime_UTR	2003509	2003541	+	ID=Cre05.g241648.t1.1.v5.5.five_prime_UTR.1;Parent=Cre05.g241648.t1.1.v5.5;pacid=30783079	-1475
chromosome_14	4153301	4153302	195	-	chromosome_14	five_prime_UTR	4154776	4155163	+	ID=Cre14.g634365.t1.1.v5.5.five_prime_UTR.1;Parent=Cre14.g634365.t1.1.v5.5;pacid=30776651	-1474
chromosome_5	2002034	2002035	180	-	chromosome_5	five_prime_UTR	2003509	2003541	+	ID=Cre05.g241648.t1.1.v5.5.five_prime_UTR.1;Parent=Cre05.g241648.t1.1.v5.5;pacid=30783079	-1474
chromosome_14	4153302	4153303	10	-	chromosome_14	five_prime_UTR	4154776	4155163	+	ID=Cre14.g634365.t1.1.v5.5.five_prime_UTR.1;Parent=Cre14.g634365.t1.1.v5.5;pacid=30776651	-1473
chromosome_5	2002035	2002036	476	-	chromosome_5	five_prime_UTR	2003509	2003541	+	ID=Cre05.g241648.t1.1.v5.5.five_prime_UTR.1;Parent=Cre05.g241648.t1.1.v5.5;pacid=30783079	-1473
chromosome_14	4153303	4153304	1787	-	chromosome_14	five_prime_UTR	4154776	4155163	+	ID=Cre14.g634365.t1.1.v5.5.five_prime_UTR.1;Parent=Cre14.g634365.t1.1.v5.5;pacid=30776651	-1472
chromosome_5	2002036	2002037	12	-	chromosome_5	five_prime_UTR	2003509	2003541	+	ID=Cre05.g241648.t1.1.v5.5.five_prime_UTR.1;Parent=Cre05.g241648.t1.1.v5.5;pacid=30783079	-1472
chromosome_5	2002038	2002039	10	-	chromosome_5	five_prime_UTR	2003509	2003541	+	ID=Cre05.g241648.t1.1.v5.5.five_prime_UTR.1;Parent=Cre05.g241648.t1.1.v5.5;pacid=30783079	-1470
chromosome_14	4153306	4153307	1013	-	chromosome_14	five_prime_UTR	4154776	4155163	+	ID=Cre14.g634365.t1.1.v5.5.five_prime_UTR.1;Parent=Cre14.g634365.t1.1.v5.5;pacid=30776651	-1469
chromosome_5	2002040	2002041	12	-	chromosome_5	five_prime_UTR	2003509	2003541	+	ID=Cre05.g241648.t1.1.v5.5.five_prime_UTR.1;Parent=Cre05.g241648.t1.1.v5.5;pacid=30783079	-1468
chromosome_14	4153313	4153314	27	-	chromosome_14	five_prime_UTR	4154776	4155163	+	ID=Cre14.g634365.t1.1.v5.5.five_prime_UTR.1;Parent=Cre14.g634365.t1.1.v5.5;pacid=30776651	-1462
chromosome_5	2002048	2002049	19	-	chromosome_5	five_prime_UTR	2003509	2003541	+	ID=Cre05.g241648.t1.1.v5.5.five_prime_UTR.1;Parent=Cre05.g241648.t1.1.v5.5;pacid=30783079	-1460
chromosome_5	2002050	2002051	32	-	chromosome_5	five_prime_UTR	2003509	2003541	+	ID=Cre05.g241648.t1.1.v5.5.five_prime_UTR.1;Parent=Cre05.g241648.t1.1.v5.5;pacid=30783079	-1458
chromosome_5	2002052	2002053	80	-	chromosome_5	five_prime_UTR	2003509	2003541	+	ID=Cre05.g241648.t1.1.v5.5.five_prime_UTR.1;Parent=Cre05.g241648.t1.1.v5.5;pacid=30783079	-1456
chromosome_5	2002053	2002054	34	-	chromosome_5	five_prime_UTR	2003509	2003541	+	ID=Cre05.g241648.t1.1.v5.5.five_prime_UTR.1;Parent=Cre05.g241648.t1.1.v5.5;pacid=30783079	-1455
chromosome_5	2002054	2002055	16	-	chromosome_5	five_prime_UTR	2003509	2003541	+	ID=Cre05.g241648.t1.1.v5.5.five_prime_UTR.1;Parent=Cre05.g241648.t1.1.v5.5;pacid=30783079	-1454
chromosome_14	4153322	4153323	15	-	chromosome_14	five_prime_UTR	4154776	4155163	+	ID=Cre14.g634365.t1.1.v5.5.five_prime_UTR.1;Parent=Cre14.g634365.t1.1.v5.5;pacid=30776651	-1453
chromosome_5	2002055	2002056	43	-	chromosome_5	five_prime_UTR	2003509	2003541	+	ID=Cre05.g241648.t1.1.v5.5.five_prime_UTR.1;Parent=Cre05.g241648.t1.1.v5.5;pacid=30783079	-1453
chromosome_14	4153323	4153324	114	-	chromosome_14	five_prime_UTR	4154776	4155163	+	ID=Cre14.g634365.t1.1.v5.5.five_prime_UTR.1;Parent=Cre14.g634365.t1.1.v5.5;pacid=30776651	-1452
chromosome_5	2002056	2002057	32	-	chromosome_5	five_prime_UTR	2003509	2003541	+	ID=Cre05.g241648.t1.1.v5.5.five_prime_UTR.1;Parent=Cre05.g241648.t1.1.v5.5;pacid=30783079	-1452
chromosome_14	4153325	4153326	129	-	chromosome_14	five_prime_UTR	4154776	4155163	+	ID=Cre14.g634365.t1.1.v5.5.five_prime_UTR.1;Parent=Cre14.g634365.t1.1.v5.5;pacid=30776651	-1450
chromosome_scaffold_21	34269	34270	10	+	chromosome_scaffold_21	five_prime_UTR	32761	32825	-	ID=Cre21.g752097.t1.1.v5.5.five_prime_UTR.1;Parent=Cre21.g752097.t1.1.v5.5;pacid=30791654	-1445
chromosome_scaffold_21	34268	34269	21	+	chromosome_scaffold_21	five_prime_UTR	32761	32825	-	ID=Cre21.g752097.t1.1.v5.5.five_prime_UTR.1;Parent=Cre21.g752097.t1.1.v5.5;pacid=30791654	-1444
chromosome_scaffold_21	34266	34267	56	+	chromosome_scaffold_21	five_prime_UTR	32761	32825	-	ID=Cre21.g752097.t1.1.v5.5.five_prime_UTR.1;Parent=Cre21.g752097.t1.1.v5.5;pacid=30791654	-1442
chromosome_14	4153339	4153340	11	-	chromosome_14	five_prime_UTR	4154776	4155163	+	ID=Cre14.g634365.t1.1.v5.5.five_prime_UTR.1;Parent=Cre14.g634365.t1.1.v5.5;pacid=30776651	-1436
chromosome_14	4153340	4153341	36	-	chromosome_14	five_prime_UTR	4154776	4155163	+	ID=Cre14.g634365.t1.1.v5.5.five_prime_UTR.1;Parent=Cre14.g634365.t1.1.v5.5;pacid=30776651	-1435
chromosome_14	4153342	4153343	10	-	chromosome_14	five_prime_UTR	4154776	4155163	+	ID=Cre14.g634365.t1.1.v5.5.five_prime_UTR.1;Parent=Cre14.g634365.t1.1.v5.5;pacid=30776651	-1433
chromosome_14	4153343	4153344	56	-	chromosome_14	five_prime_UTR	4154776	4155163	+	ID=Cre14.g634365.t1.1.v5.5.five_prime_UTR.1;Parent=Cre14.g634365.t1.1.v5.5;pacid=30776651	-1432
chromosome_14	4153350	4153351	64	-	chromosome_14	five_prime_UTR	4154776	4155163	+	ID=Cre14.g634365.t1.1.v5.5.five_prime_UTR.1;Parent=Cre14.g634365.t1.1.v5.5;pacid=30776651	-1425
chromosome_14	4153352	4153353	483	-	chromosome_14	five_prime_UTR	4154776	4155163	+	ID=Cre14.g634365.t1.1.v5.5.five_prime_UTR.1;Parent=Cre14.g634365.t1.1.v5.5;pacid=30776651	-1423
chromosome_14	4153356	4153357	24	-	chromosome_14	five_prime_UTR	4154776	4155163	+	ID=Cre14.g634365.t1.1.v5.5.five_prime_UTR.1;Parent=Cre14.g634365.t1.1.v5.5;pacid=30776651	-1419
chromosome_14	4153357	4153358	697	-	chromosome_14	five_prime_UTR	4154776	4155163	+	ID=Cre14.g634365.t1.1.v5.5.five_prime_UTR.1;Parent=Cre14.g634365.t1.1.v5.5;pacid=30776651	-1418
chromosome_11	3755804	3755805	13	-	chromosome_11	five_prime_UTR	3757217	3757353	+	ID=Cre11.g483033.t1.1.v5.5.five_prime_UTR.1;Parent=Cre11.g483033.t1.1.v5.5;pacid=30775543	-1412
chromosome_14	4153364	4153365	44	-	chromosome_14	five_prime_UTR	4154776	4155163	+	ID=Cre14.g634365.t1.1.v5.5.five_prime_UTR.1;Parent=Cre14.g634365.t1.1.v5.5;pacid=30776651	-1411
chromosome_14	4153369	4153370	10	-	chromosome_14	five_prime_UTR	4154776	4155163	+	ID=Cre14.g634365.t1.1.v5.5.five_prime_UTR.1;Parent=Cre14.g634365.t1.1.v5.5;pacid=30776651	-1406
chromosome_14	4153370	4153371	70	-	chromosome_14	five_prime_UTR	4154776	4155163	+	ID=Cre14.g634365.t1.1.v5.5.five_prime_UTR.1;Parent=Cre14.g634365.t1.1.v5.5;pacid=30776651	-1405
chromosome_14	4153372	4153373	75	-	chromosome_14	five_prime_UTR	4154776	4155163	+	ID=Cre14.g634365.t1.1.v5.5.five_prime_UTR.1;Parent=Cre14.g634365.t1.1.v5.5;pacid=30776651	-1403
chromosome_14	4153373	4153374	206	-	chromosome_14	five_prime_UTR	4154776	4155163	+	ID=Cre14.g634365.t1.1.v5.5.five_prime_UTR.1;Parent=Cre14.g634365.t1.1.v5.5;pacid=30776651	-1402
chromosome_14	4153374	4153375	38	-	chromosome_14	five_prime_UTR	4154776	4155163	+	ID=Cre14.g634365.t1.1.v5.5.five_prime_UTR.1;Parent=Cre14.g634365.t1.1.v5.5;pacid=30776651	-1401
chromosome_14	4153376	4153377	17	-	chromosome_14	five_prime_UTR	4154776	4155163	+	ID=Cre14.g634365.t1.1.v5.5.five_prime_UTR.1;Parent=Cre14.g634365.t1.1.v5.5;pacid=30776651	-1399
chromosome_14	4153377	4153378	33	-	chromosome_14	five_prime_UTR	4154776	4155163	+	ID=Cre14.g634365.t1.1.v5.5.five_prime_UTR.1;Parent=Cre14.g634365.t1.1.v5.5;pacid=30776651	-1398
chromosome_14	4153381	4153382	13	-	chromosome_14	five_prime_UTR	4154776	4155163	+	ID=Cre14.g634365.t1.1.v5.5.five_prime_UTR.1;Parent=Cre14.g634365.t1.1.v5.5;pacid=30776651	-1394
chromosome_14	4153382	4153383	40	-	chromosome_14	five_prime_UTR	4154776	4155163	+	ID=Cre14.g634365.t1.1.v5.5.five_prime_UTR.1;Parent=Cre14.g634365.t1.1.v5.5;pacid=30776651	-1393
chromosome_14	4153384	4153385	29	-	chromosome_14	five_prime_UTR	4154776	4155163	+	ID=Cre14.g634365.t1.1.v5.5.five_prime_UTR.1;Parent=Cre14.g634365.t1.1.v5.5;pacid=30776651	-1391
chromosome_14	4153385	4153386	85	-	chromosome_14	five_prime_UTR	4154776	4155163	+	ID=Cre14.g634365.t1.1.v5.5.five_prime_UTR.1;Parent=Cre14.g634365.t1.1.v5.5;pacid=30776651	-1390
chromosome_14	4153386	4153387	136	-	chromosome_14	five_prime_UTR	4154776	4155163	+	ID=Cre14.g634365.t1.1.v5.5.five_prime_UTR.1;Parent=Cre14.g634365.t1.1.v5.5;pacid=30776651	-1389
chromosome_14	4153387	4153388	2484	-	chromosome_14	five_prime_UTR	4154776	4155163	+	ID=Cre14.g634365.t1.1.v5.5.five_prime_UTR.1;Parent=Cre14.g634365.t1.1.v5.5;pacid=30776651	-1388
chromosome_14	4153388	4153389	36	-	chromosome_14	five_prime_UTR	4154776	4155163	+	ID=Cre14.g634365.t1.1.v5.5.five_prime_UTR.1;Parent=Cre14.g634365.t1.1.v5.5;pacid=30776651	-1387
chromosome_14	4153389	4153390	13	-	chromosome_14	five_prime_UTR	4154776	4155163	+	ID=Cre14.g634365.t1.1.v5.5.five_prime_UTR.1;Parent=Cre14.g634365.t1.1.v5.5;pacid=30776651	-1386
chromosome_14	4153390	4153391	13	-	chromosome_14	five_prime_UTR	4154776	4155163	+	ID=Cre14.g634365.t1.1.v5.5.five_prime_UTR.1;Parent=Cre14.g634365.t1.1.v5.5;pacid=30776651	-1385
chromosome_14	4153410	4153411	11	-	chromosome_14	five_prime_UTR	4154776	4155163	+	ID=Cre14.g634365.t1.1.v5.5.five_prime_UTR.1;Parent=Cre14.g634365.t1.1.v5.5;pacid=30776651	-1365
chromosome_14	4153411	4153412	20	-	chromosome_14	five_prime_UTR	4154776	4155163	+	ID=Cre14.g634365.t1.1.v5.5.five_prime_UTR.1;Parent=Cre14.g634365.t1.1.v5.5;pacid=30776651	-1364
chromosome_14	599664	599665	13	+	chromosome_14	five_prime_UTR	598025	598304	-	ID=Cre14.g611950.t1.1.v5.5.five_prime_UTR.1;Parent=Cre14.g611950.t1.1.v5.5;pacid=30776532	-1361
chromosome_14	4153423	4153424	11	-	chromosome_14	five_prime_UTR	4154776	4155163	+	ID=Cre14.g634365.t1.1.v5.5.five_prime_UTR.1;Parent=Cre14.g634365.t1.1.v5.5;pacid=30776651	-1352
chromosome_14	4153430	4153431	29	-	chromosome_14	five_prime_UTR	4154776	4155163	+	ID=Cre14.g634365.t1.1.v5.5.five_prime_UTR.1;Parent=Cre14.g634365.t1.1.v5.5;pacid=30776651	-1345
chromosome_14	4153447	4153448	15	-	chromosome_14	five_prime_UTR	4154776	4155163	+	ID=Cre14.g634365.t1.1.v5.5.five_prime_UTR.1;Parent=Cre14.g634365.t1.1.v5.5;pacid=30776651	-1328
chromosome_14	4153449	4153450	55	-	chromosome_14	five_prime_UTR	4154776	4155163	+	ID=Cre14.g634365.t1.1.v5.5.five_prime_UTR.1;Parent=Cre14.g634365.t1.1.v5.5;pacid=30776651	-1326
chromosome_14	4153450	4153451	64	-	chromosome_14	five_prime_UTR	4154776	4155163	+	ID=Cre14.g634365.t1.1.v5.5.five_prime_UTR.1;Parent=Cre14.g634365.t1.1.v5.5;pacid=30776651	-1325
chromosome_14	4153451	4153452	498	-	chromosome_14	five_prime_UTR	4154776	4155163	+	ID=Cre14.g634365.t1.1.v5.5.five_prime_UTR.1;Parent=Cre14.g634365.t1.1.v5.5;pacid=30776651	-1324
chromosome_14	4153452	4153453	267	-	chromosome_14	five_prime_UTR	4154776	4155163	+	ID=Cre14.g634365.t1.1.v5.5.five_prime_UTR.1;Parent=Cre14.g634365.t1.1.v5.5;pacid=30776651	-1323
chromosome_14	4153453	4153454	37	-	chromosome_14	five_prime_UTR	4154776	4155163	+	ID=Cre14.g634365.t1.1.v5.5.five_prime_UTR.1;Parent=Cre14.g634365.t1.1.v5.5;pacid=30776651	-1322
chromosome_14	4153454	4153455	15	-	chromosome_14	five_prime_UTR	4154776	4155163	+	ID=Cre14.g634365.t1.1.v5.5.five_prime_UTR.1;Parent=Cre14.g634365.t1.1.v5.5;pacid=30776651	-1321
chromosome_9	1039145	1039146	71	-	chromosome_9	five_prime_UTR	1040456	1041019	+	ID=Cre09.g400750.t1.2.v5.5.five_prime_UTR.1;Parent=Cre09.g400750.t1.2.v5.5;pacid=30780710	-1310
chromosome_10	783674	783675	10	-	chromosome_10	five_prime_UTR	784981	785289	+	ID=Cre10.g423150.t1.1.v5.5.five_prime_UTR.1;Parent=Cre10.g423150.t1.1.v5.5;pacid=30790315	-1306
chromosome_10	783675	783676	262	-	chromosome_10	five_prime_UTR	784981	785289	+	ID=Cre10.g423150.t1.1.v5.5.five_prime_UTR.1;Parent=Cre10.g423150.t1.1.v5.5;pacid=30790315	-1305
chromosome_10	783676	783677	171	-	chromosome_10	five_prime_UTR	784981	785289	+	ID=Cre10.g423150.t1.1.v5.5.five_prime_UTR.1;Parent=Cre10.g423150.t1.1.v5.5;pacid=30790315	-1304
chromosome_10	783677	783678	632	-	chromosome_10	five_prime_UTR	784981	785289	+	ID=Cre10.g423150.t1.1.v5.5.five_prime_UTR.1;Parent=Cre10.g423150.t1.1.v5.5;pacid=30790315	-1303
chromosome_10	783678	783679	43	-	chromosome_10	five_prime_UTR	784981	785289	+	ID=Cre10.g423150.t1.1.v5.5.five_prime_UTR.1;Parent=Cre10.g423150.t1.1.v5.5;pacid=30790315	-1302
chromosome_10	783679	783680	28	-	chromosome_10	five_prime_UTR	784981	785289	+	ID=Cre10.g423150.t1.1.v5.5.five_prime_UTR.1;Parent=Cre10.g423150.t1.1.v5.5;pacid=30790315	-1301
chromosome_10	783680	783681	31	-	chromosome_10	five_prime_UTR	784981	785289	+	ID=Cre10.g423150.t1.1.v5.5.five_prime_UTR.1;Parent=Cre10.g423150.t1.1.v5.5;pacid=30790315	-1300
chromosome_10	783681	783682	53	-	chromosome_10	five_prime_UTR	784981	785289	+	ID=Cre10.g423150.t1.1.v5.5.five_prime_UTR.1;Parent=Cre10.g423150.t1.1.v5.5;pacid=30790315	-1299
chromosome_10	783683	783684	11	-	chromosome_10	five_prime_UTR	784981	785289	+	ID=Cre10.g423150.t1.1.v5.5.five_prime_UTR.1;Parent=Cre10.g423150.t1.1.v5.5;pacid=30790315	-1297
chromosome_14	599585	599586	12	+	chromosome_14	five_prime_UTR	598025	598304	-	ID=Cre14.g611950.t1.1.v5.5.five_prime_UTR.1;Parent=Cre14.g611950.t1.1.v5.5;pacid=30776532	-1282
chromosome_14	4153499	4153500	17	-	chromosome_14	five_prime_UTR	4154776	4155163	+	ID=Cre14.g634365.t1.1.v5.5.five_prime_UTR.1;Parent=Cre14.g634365.t1.1.v5.5;pacid=30776651	-1276
chromosome_8	3923338	3923339	10	-	chromosome_8	five_prime_UTR	3924604	3924716	+	ID=Cre08.g378400.t1.2.v5.5.five_prime_UTR.1;Parent=Cre08.g378400.t1.2.v5.5;pacid=30774107	-1265
chromosome_8	3923339	3923340	15	-	chromosome_8	five_prime_UTR	3924604	3924716	+	ID=Cre08.g378400.t1.2.v5.5.five_prime_UTR.1;Parent=Cre08.g378400.t1.2.v5.5;pacid=30774107	-1264
chromosome_8	3923340	3923341	496	-	chromosome_8	five_prime_UTR	3924604	3924716	+	ID=Cre08.g378400.t1.2.v5.5.five_prime_UTR.1;Parent=Cre08.g378400.t1.2.v5.5;pacid=30774107	-1263
chromosome_8	3923341	3923342	302	-	chromosome_8	five_prime_UTR	3924604	3924716	+	ID=Cre08.g378400.t1.2.v5.5.five_prime_UTR.1;Parent=Cre08.g378400.t1.2.v5.5;pacid=30774107	-1262
chromosome_8	3923342	3923343	1456	-	chromosome_8	five_prime_UTR	3924604	3924716	+	ID=Cre08.g378400.t1.2.v5.5.five_prime_UTR.1;Parent=Cre08.g378400.t1.2.v5.5;pacid=30774107	-1261
chromosome_8	3923343	3923344	124	-	chromosome_8	five_prime_UTR	3924604	3924716	+	ID=Cre08.g378400.t1.2.v5.5.five_prime_UTR.1;Parent=Cre08.g378400.t1.2.v5.5;pacid=30774107	-1260
chromosome_8	3923344	3923345	63	-	chromosome_8	five_prime_UTR	3924604	3924716	+	ID=Cre08.g378400.t1.2.v5.5.five_prime_UTR.1;Parent=Cre08.g378400.t1.2.v5.5;pacid=30774107	-1259
chromosome_8	3923345	3923346	77	-	chromosome_8	five_prime_UTR	3924604	3924716	+	ID=Cre08.g378400.t1.2.v5.5.five_prime_UTR.1;Parent=Cre08.g378400.t1.2.v5.5;pacid=30774107	-1258
chromosome_8	3923346	3923347	126	-	chromosome_8	five_prime_UTR	3924604	3924716	+	ID=Cre08.g378400.t1.2.v5.5.five_prime_UTR.1;Parent=Cre08.g378400.t1.2.v5.5;pacid=30774107	-1257
chromosome_8	3923348	3923349	14	-	chromosome_8	five_prime_UTR	3924604	3924716	+	ID=Cre08.g378400.t1.2.v5.5.five_prime_UTR.1;Parent=Cre08.g378400.t1.2.v5.5;pacid=30774107	-1255
chromosome_4	1048404	1048405	11	+	chromosome_4	five_prime_UTR	1047107	1047155	-	ID=Cre04.g217990.t1.1.v5.5.five_prime_UTR.1;Parent=Cre04.g217990.t1.1.v5.5;pacid=30791393	-1250
chromosome_4	1141405	1141406	10	-	chromosome_4	five_prime_UTR	1142656	1142820	+	ID=Cre04.g215900.t1.1.v5.5.five_prime_UTR.1;Parent=Cre04.g215900.t1.1.v5.5;pacid=30791612	-1250
chromosome_4	1048399	1048400	20	+	chromosome_4	five_prime_UTR	1047107	1047155	-	ID=Cre04.g217990.t1.1.v5.5.five_prime_UTR.1;Parent=Cre04.g217990.t1.1.v5.5;pacid=30791393	-1245
chromosome_4	1048397	1048398	78	+	chromosome_4	five_prime_UTR	1047107	1047155	-	ID=Cre04.g217990.t1.1.v5.5.five_prime_UTR.1;Parent=Cre04.g217990.t1.1.v5.5;pacid=30791393	-1243
chromosome_5	2873926	2873927	21	+	chromosome_5	five_prime_UTR	2872291	2872699	-	ID=Cre05.g237930.t1.1.v5.5.five_prime_UTR.1;Parent=Cre05.g237930.t1.1.v5.5;pacid=30783175	-1228
chromosome_11	2933796	2933797	11	-	chromosome_11	five_prime_UTR	2934995	2935093	+	ID=Cre11.g478128.t1.1.v5.5.five_prime_UTR.1;Parent=Cre11.g478128.t1.1.v5.5;pacid=30775784	-1198
chromosome_14	4153577	4153578	10	-	chromosome_14	five_prime_UTR	4154776	4155163	+	ID=Cre14.g634365.t1.1.v5.5.five_prime_UTR.1;Parent=Cre14.g634365.t1.1.v5.5;pacid=30776651	-1198
chromosome_8	4268203	4268204	16	-	chromosome_8	five_prime_UTR	4269400	4269445	+	ID=Cre08.g381000.t1.2.v5.5.five_prime_UTR.1;Parent=Cre08.g381000.t1.2.v5.5;pacid=30773581	-1196
chromosome_2	4635531	4635532	11	+	chromosome_2	five_prime_UTR	4634081	4634338	-	ID=Cre02.g101150.t1.2.v5.5.five_prime_UTR.1;Parent=Cre02.g101150.t1.2.v5.5;pacid=30785102	-1194
chromosome_14	4153585	4153586	14	-	chromosome_14	five_prime_UTR	4154776	4155163	+	ID=Cre14.g634365.t1.1.v5.5.five_prime_UTR.1;Parent=Cre14.g634365.t1.1.v5.5;pacid=30776651	-1190
chromosome_14	4153586	4153587	12	-	chromosome_14	five_prime_UTR	4154776	4155163	+	ID=Cre14.g634365.t1.1.v5.5.five_prime_UTR.1;Parent=Cre14.g634365.t1.1.v5.5;pacid=30776651	-1189
chromosome_14	4153587	4153588	93	-	chromosome_14	five_prime_UTR	4154776	4155163	+	ID=Cre14.g634365.t1.1.v5.5.five_prime_UTR.1;Parent=Cre14.g634365.t1.1.v5.5;pacid=30776651	-1188
chromosome_14	4153588	4153589	1808	-	chromosome_14	five_prime_UTR	4154776	4155163	+	ID=Cre14.g634365.t1.1.v5.5.five_prime_UTR.1;Parent=Cre14.g634365.t1.1.v5.5;pacid=30776651	-1187
chromosome_14	4153591	4153592	11	-	chromosome_14	five_prime_UTR	4154776	4155163	+	ID=Cre14.g634365.t1.1.v5.5.five_prime_UTR.1;Parent=Cre14.g634365.t1.1.v5.5;pacid=30776651	-1184
chromosome_12	5981694	5981695	22	-	chromosome_12	five_prime_UTR	5982872	5983534	+	ID=Cre12.g534876.t1.1.v5.5.five_prime_UTR.1;Parent=Cre12.g534876.t1.1.v5.5;pacid=30792908	-1177
chromosome_14	4153600	4153601	16	-	chromosome_14	five_prime_UTR	4154776	4155163	+	ID=Cre14.g634365.t1.1.v5.5.five_prime_UTR.1;Parent=Cre14.g634365.t1.1.v5.5;pacid=30776651	-1175
chromosome_14	4153601	4153602	31	-	chromosome_14	five_prime_UTR	4154776	4155163	+	ID=Cre14.g634365.t1.1.v5.5.five_prime_UTR.1;Parent=Cre14.g634365.t1.1.v5.5;pacid=30776651	-1174
chromosome_2	4400853	4400854	19	+	chromosome_2	five_prime_UTR	4399560	4399680	-	ID=Cre02.g099650.t1.2.v5.5.five_prime_UTR.1;Parent=Cre02.g099650.t1.2.v5.5;pacid=30785794	-1174
chromosome_7	4383970	4383971	38	-	chromosome_7	five_prime_UTR	4385145	4385414	+	ID=Cre07.g341100.t1.2.v5.5.five_prime_UTR.1;Parent=Cre07.g341100.t1.2.v5.5;pacid=30775320	-1174
chromosome_14	4153602	4153603	451	-	chromosome_14	five_prime_UTR	4154776	4155163	+	ID=Cre14.g634365.t1.1.v5.5.five_prime_UTR.1;Parent=Cre14.g634365.t1.1.v5.5;pacid=30776651	-1173
chromosome_2	4400852	4400853	10	+	chromosome_2	five_prime_UTR	4399560	4399680	-	ID=Cre02.g099650.t1.2.v5.5.five_prime_UTR.1;Parent=Cre02.g099650.t1.2.v5.5;pacid=30785794	-1173
chromosome_7	4383972	4383973	24	-	chromosome_7	five_prime_UTR	4385145	4385414	+	ID=Cre07.g341100.t1.2.v5.5.five_prime_UTR.1;Parent=Cre07.g341100.t1.2.v5.5;pacid=30775320	-1172
chromosome_14	4153609	4153610	26	-	chromosome_14	five_prime_UTR	4154776	4155163	+	ID=Cre14.g634365.t1.1.v5.5.five_prime_UTR.1;Parent=Cre14.g634365.t1.1.v5.5;pacid=30776651	-1166
chromosome_scaffold_21	35139	35140	27	-	chromosome_scaffold_21	five_prime_UTR	36306	36597	+	ID=Cre21.g752147.t1.1.v5.5.five_prime_UTR.1;Parent=Cre21.g752147.t1.1.v5.5;pacid=30791623	-1166
chromosome_scaffold_21	35140	35141	13	-	chromosome_scaffold_21	five_prime_UTR	36306	36597	+	ID=Cre21.g752147.t1.1.v5.5.five_prime_UTR.1;Parent=Cre21.g752147.t1.1.v5.5;pacid=30791623	-1165
chromosome_14	4153611	4153612	11	-	chromosome_14	five_prime_UTR	4154776	4155163	+	ID=Cre14.g634365.t1.1.v5.5.five_prime_UTR.1;Parent=Cre14.g634365.t1.1.v5.5;pacid=30776651	-1164
chromosome_scaffold_21	35141	35142	56	-	chromosome_scaffold_21	five_prime_UTR	36306	36597	+	ID=Cre21.g752147.t1.1.v5.5.five_prime_UTR.1;Parent=Cre21.g752147.t1.1.v5.5;pacid=30791623	-1164
chromosome_14	4153612	4153613	20	-	chromosome_14	five_prime_UTR	4154776	4155163	+	ID=Cre14.g634365.t1.1.v5.5.five_prime_UTR.1;Parent=Cre14.g634365.t1.1.v5.5;pacid=30776651	-1163
chromosome_scaffold_21	35142	35143	22	-	chromosome_scaffold_21	five_prime_UTR	36306	36597	+	ID=Cre21.g752147.t1.1.v5.5.five_prime_UTR.1;Parent=Cre21.g752147.t1.1.v5.5;pacid=30791623	-1163
chromosome_14	4153613	4153614	10	-	chromosome_14	five_prime_UTR	4154776	4155163	+	ID=Cre14.g634365.t1.1.v5.5.five_prime_UTR.1;Parent=Cre14.g634365.t1.1.v5.5;pacid=30776651	-1162
chromosome_scaffold_21	35143	35144	20	-	chromosome_scaffold_21	five_prime_UTR	36306	36597	+	ID=Cre21.g752147.t1.1.v5.5.five_prime_UTR.1;Parent=Cre21.g752147.t1.1.v5.5;pacid=30791623	-1162
chromosome_14	4153614	4153615	11	-	chromosome_14	five_prime_UTR	4154776	4155163	+	ID=Cre14.g634365.t1.1.v5.5.five_prime_UTR.1;Parent=Cre14.g634365.t1.1.v5.5;pacid=30776651	-1161
chromosome_14	4153615	4153616	12	-	chromosome_14	five_prime_UTR	4154776	4155163	+	ID=Cre14.g634365.t1.1.v5.5.five_prime_UTR.1;Parent=Cre14.g634365.t1.1.v5.5;pacid=30776651	-1160
chromosome_1	7438532	7438533	61	+	chromosome_1	five_prime_UTR	7437346	7437377	-	ID=Cre01.g053360.t1.2.v5.5.five_prime_UTR.1;Parent=Cre01.g053360.t1.2.v5.5;pacid=30788585	-1156
chromosome_14	4153619	4153620	12	-	chromosome_14	five_prime_UTR	4154776	4155163	+	ID=Cre14.g634365.t1.1.v5.5.five_prime_UTR.1;Parent=Cre14.g634365.t1.1.v5.5;pacid=30776651	-1156
chromosome_14	4153620	4153621	14	-	chromosome_14	five_prime_UTR	4154776	4155163	+	ID=Cre14.g634365.t1.1.v5.5.five_prime_UTR.1;Parent=Cre14.g634365.t1.1.v5.5;pacid=30776651	-1155
chromosome_14	4153621	4153622	192	-	chromosome_14	five_prime_UTR	4154776	4155163	+	ID=Cre14.g634365.t1.1.v5.5.five_prime_UTR.1;Parent=Cre14.g634365.t1.1.v5.5;pacid=30776651	-1154
chromosome_14	4153624	4153625	39	-	chromosome_14	five_prime_UTR	4154776	4155163	+	ID=Cre14.g634365.t1.1.v5.5.five_prime_UTR.1;Parent=Cre14.g634365.t1.1.v5.5;pacid=30776651	-1151
chromosome_14	4153626	4153627	103	-	chromosome_14	five_prime_UTR	4154776	4155163	+	ID=Cre14.g634365.t1.1.v5.5.five_prime_UTR.1;Parent=Cre14.g634365.t1.1.v5.5;pacid=30776651	-1149
chromosome_14	4153628	4153629	15	-	chromosome_14	five_prime_UTR	4154776	4155163	+	ID=Cre14.g634365.t1.1.v5.5.five_prime_UTR.1;Parent=Cre14.g634365.t1.1.v5.5;pacid=30776651	-1147
chromosome_14	4153629	4153630	14	-	chromosome_14	five_prime_UTR	4154776	4155163	+	ID=Cre14.g634365.t1.1.v5.5.five_prime_UTR.1;Parent=Cre14.g634365.t1.1.v5.5;pacid=30776651	-1146
chromosome_14	4153631	4153632	29	-	chromosome_14	five_prime_UTR	4154776	4155163	+	ID=Cre14.g634365.t1.1.v5.5.five_prime_UTR.1;Parent=Cre14.g634365.t1.1.v5.5;pacid=30776651	-1144
chromosome_14	4153632	4153633	79	-	chromosome_14	five_prime_UTR	4154776	4155163	+	ID=Cre14.g634365.t1.1.v5.5.five_prime_UTR.1;Parent=Cre14.g634365.t1.1.v5.5;pacid=30776651	-1143
chromosome_14	4153633	4153634	33	-	chromosome_14	five_prime_UTR	4154776	4155163	+	ID=Cre14.g634365.t1.1.v5.5.five_prime_UTR.1;Parent=Cre14.g634365.t1.1.v5.5;pacid=30776651	-1142
chromosome_4	1141513	1141514	11	-	chromosome_4	five_prime_UTR	1142656	1142820	+	ID=Cre04.g215900.t1.1.v5.5.five_prime_UTR.1;Parent=Cre04.g215900.t1.1.v5.5;pacid=30791612	-1142
chromosome_14	4153634	4153635	70	-	chromosome_14	five_prime_UTR	4154776	4155163	+	ID=Cre14.g634365.t1.1.v5.5.five_prime_UTR.1;Parent=Cre14.g634365.t1.1.v5.5;pacid=30776651	-1141
chromosome_4	1141514	1141515	10	-	chromosome_4	five_prime_UTR	1142656	1142820	+	ID=Cre04.g215900.t1.1.v5.5.five_prime_UTR.1;Parent=Cre04.g215900.t1.1.v5.5;pacid=30791612	-1141
chromosome_14	4153635	4153636	1668	-	chromosome_14	five_prime_UTR	4154776	4155163	+	ID=Cre14.g634365.t1.1.v5.5.five_prime_UTR.1;Parent=Cre14.g634365.t1.1.v5.5;pacid=30776651	-1140
chromosome_14	4153636	4153637	3015	-	chromosome_14	five_prime_UTR	4154776	4155163	+	ID=Cre14.g634365.t1.1.v5.5.five_prime_UTR.1;Parent=Cre14.g634365.t1.1.v5.5;pacid=30776651	-1139
chromosome_14	4153638	4153639	10	-	chromosome_14	five_prime_UTR	4154776	4155163	+	ID=Cre14.g634365.t1.1.v5.5.five_prime_UTR.1;Parent=Cre14.g634365.t1.1.v5.5;pacid=30776651	-1137
chromosome_14	4153639	4153640	10	-	chromosome_14	five_prime_UTR	4154776	4155163	+	ID=Cre14.g634365.t1.1.v5.5.five_prime_UTR.1;Parent=Cre14.g634365.t1.1.v5.5;pacid=30776651	-1136
chromosome_14	4153641	4153642	13	-	chromosome_14	five_prime_UTR	4154776	4155163	+	ID=Cre14.g634365.t1.1.v5.5.five_prime_UTR.1;Parent=Cre14.g634365.t1.1.v5.5;pacid=30776651	-1134
chromosome_4	1141521	1141522	10	-	chromosome_4	five_prime_UTR	1142656	1142820	+	ID=Cre04.g215900.t1.1.v5.5.five_prime_UTR.1;Parent=Cre04.g215900.t1.1.v5.5;pacid=30791612	-1134
chromosome_14	4153642	4153643	27	-	chromosome_14	five_prime_UTR	4154776	4155163	+	ID=Cre14.g634365.t1.1.v5.5.five_prime_UTR.1;Parent=Cre14.g634365.t1.1.v5.5;pacid=30776651	-1133
chromosome_4	1141523	1141524	22	-	chromosome_4	five_prime_UTR	1142656	1142820	+	ID=Cre04.g215900.t1.1.v5.5.five_prime_UTR.1;Parent=Cre04.g215900.t1.1.v5.5;pacid=30791612	-1132
chromosome_14	4153644	4153645	31	-	chromosome_14	five_prime_UTR	4154776	4155163	+	ID=Cre14.g634365.t1.1.v5.5.five_prime_UTR.1;Parent=Cre14.g634365.t1.1.v5.5;pacid=30776651	-1131
chromosome_14	4153645	4153646	67	-	chromosome_14	five_prime_UTR	4154776	4155163	+	ID=Cre14.g634365.t1.1.v5.5.five_prime_UTR.1;Parent=Cre14.g634365.t1.1.v5.5;pacid=30776651	-1130
chromosome_4	1141526	1141527	81	-	chromosome_4	five_prime_UTR	1142656	1142820	+	ID=Cre04.g215900.t1.1.v5.5.five_prime_UTR.1;Parent=Cre04.g215900.t1.1.v5.5;pacid=30791612	-1129
chromosome_4	1141527	1141528	39	-	chromosome_4	five_prime_UTR	1142656	1142820	+	ID=Cre04.g215900.t1.1.v5.5.five_prime_UTR.1;Parent=Cre04.g215900.t1.1.v5.5;pacid=30791612	-1128
chromosome_4	1141528	1141529	270	-	chromosome_4	five_prime_UTR	1142656	1142820	+	ID=Cre04.g215900.t1.1.v5.5.five_prime_UTR.1;Parent=Cre04.g215900.t1.1.v5.5;pacid=30791612	-1127
chromosome_4	1141529	1141530	36	-	chromosome_4	five_prime_UTR	1142656	1142820	+	ID=Cre04.g215900.t1.1.v5.5.five_prime_UTR.1;Parent=Cre04.g215900.t1.1.v5.5;pacid=30791612	-1126
chromosome_4	1141530	1141531	10	-	chromosome_4	five_prime_UTR	1142656	1142820	+	ID=Cre04.g215900.t1.1.v5.5.five_prime_UTR.1;Parent=Cre04.g215900.t1.1.v5.5;pacid=30791612	-1125
chromosome_14	4153652	4153653	10	-	chromosome_14	five_prime_UTR	4154776	4155163	+	ID=Cre14.g634365.t1.1.v5.5.five_prime_UTR.1;Parent=Cre14.g634365.t1.1.v5.5;pacid=30776651	-1123
chromosome_2	8266408	8266409	24	-	chromosome_2	five_prime_UTR	8267532	8267802	+	ID=Cre02.g141306.t1.1.v5.5.five_prime_UTR.1;Parent=Cre02.g141306.t1.1.v5.5;pacid=30785026	-1123
chromosome_4	1141536	1141537	64	-	chromosome_4	five_prime_UTR	1142656	1142820	+	ID=Cre04.g215900.t1.1.v5.5.five_prime_UTR.1;Parent=Cre04.g215900.t1.1.v5.5;pacid=30791612	-1119
chromosome_4	1141537	1141538	28	-	chromosome_4	five_prime_UTR	1142656	1142820	+	ID=Cre04.g215900.t1.1.v5.5.five_prime_UTR.1;Parent=Cre04.g215900.t1.1.v5.5;pacid=30791612	-1118
chromosome_4	1141538	1141539	116	-	chromosome_4	five_prime_UTR	1142656	1142820	+	ID=Cre04.g215900.t1.1.v5.5.five_prime_UTR.1;Parent=Cre04.g215900.t1.1.v5.5;pacid=30791612	-1117
chromosome_4	1141539	1141540	15	-	chromosome_4	five_prime_UTR	1142656	1142820	+	ID=Cre04.g215900.t1.1.v5.5.five_prime_UTR.1;Parent=Cre04.g215900.t1.1.v5.5;pacid=30791612	-1116
chromosome_4	1141540	1141541	33	-	chromosome_4	five_prime_UTR	1142656	1142820	+	ID=Cre04.g215900.t1.1.v5.5.five_prime_UTR.1;Parent=Cre04.g215900.t1.1.v5.5;pacid=30791612	-1115
chromosome_14	4153661	4153662	10	-	chromosome_14	five_prime_UTR	4154776	4155163	+	ID=Cre14.g634365.t1.1.v5.5.five_prime_UTR.1;Parent=Cre14.g634365.t1.1.v5.5;pacid=30776651	-1114
chromosome_4	1141541	1141542	20	-	chromosome_4	five_prime_UTR	1142656	1142820	+	ID=Cre04.g215900.t1.1.v5.5.five_prime_UTR.1;Parent=Cre04.g215900.t1.1.v5.5;pacid=30791612	-1114
chromosome_14	4153667	4153668	10	-	chromosome_14	five_prime_UTR	4154776	4155163	+	ID=Cre14.g634365.t1.1.v5.5.five_prime_UTR.1;Parent=Cre14.g634365.t1.1.v5.5;pacid=30776651	-1108
chromosome_14	4153668	4153669	14	-	chromosome_14	five_prime_UTR	4154776	4155163	+	ID=Cre14.g634365.t1.1.v5.5.five_prime_UTR.1;Parent=Cre14.g634365.t1.1.v5.5;pacid=30776651	-1107
chromosome_14	4153669	4153670	34	-	chromosome_14	five_prime_UTR	4154776	4155163	+	ID=Cre14.g634365.t1.1.v5.5.five_prime_UTR.1;Parent=Cre14.g634365.t1.1.v5.5;pacid=30776651	-1106
chromosome_14	4153670	4153671	29	-	chromosome_14	five_prime_UTR	4154776	4155163	+	ID=Cre14.g634365.t1.1.v5.5.five_prime_UTR.1;Parent=Cre14.g634365.t1.1.v5.5;pacid=30776651	-1105
chromosome_14	4153671	4153672	10	-	chromosome_14	five_prime_UTR	4154776	4155163	+	ID=Cre14.g634365.t1.1.v5.5.five_prime_UTR.1;Parent=Cre14.g634365.t1.1.v5.5;pacid=30776651	-1104
chromosome_14	4153672	4153673	29	-	chromosome_14	five_prime_UTR	4154776	4155163	+	ID=Cre14.g634365.t1.1.v5.5.five_prime_UTR.1;Parent=Cre14.g634365.t1.1.v5.5;pacid=30776651	-1103
chromosome_14	4153673	4153674	17	-	chromosome_14	five_prime_UTR	4154776	4155163	+	ID=Cre14.g634365.t1.1.v5.5.five_prime_UTR.1;Parent=Cre14.g634365.t1.1.v5.5;pacid=30776651	-1102
chromosome_14	4153674	4153675	34	-	chromosome_14	five_prime_UTR	4154776	4155163	+	ID=Cre14.g634365.t1.1.v5.5.five_prime_UTR.1;Parent=Cre14.g634365.t1.1.v5.5;pacid=30776651	-1101
chromosome_14	4153675	4153676	68	-	chromosome_14	five_prime_UTR	4154776	4155163	+	ID=Cre14.g634365.t1.1.v5.5.five_prime_UTR.1;Parent=Cre14.g634365.t1.1.v5.5;pacid=30776651	-1100
chromosome_14	4153676	4153677	161	-	chromosome_14	five_prime_UTR	4154776	4155163	+	ID=Cre14.g634365.t1.1.v5.5.five_prime_UTR.1;Parent=Cre14.g634365.t1.1.v5.5;pacid=30776651	-1099
chromosome_14	4153677	4153678	767	-	chromosome_14	five_prime_UTR	4154776	4155163	+	ID=Cre14.g634365.t1.1.v5.5.five_prime_UTR.1;Parent=Cre14.g634365.t1.1.v5.5;pacid=30776651	-1098
chromosome_14	4153678	4153679	341	-	chromosome_14	five_prime_UTR	4154776	4155163	+	ID=Cre14.g634365.t1.1.v5.5.five_prime_UTR.1;Parent=Cre14.g634365.t1.1.v5.5;pacid=30776651	-1097
chromosome_14	4153679	4153680	1441	-	chromosome_14	five_prime_UTR	4154776	4155163	+	ID=Cre14.g634365.t1.1.v5.5.five_prime_UTR.1;Parent=Cre14.g634365.t1.1.v5.5;pacid=30776651	-1096
chromosome_1	17670	17671	13	-	chromosome_1	five_prime_UTR	18766	19162	+	ID=Cre01.g000017.t1.1.v5.5.five_prime_UTR.1;Parent=Cre01.g000017.t1.1.v5.5;pacid=30789166	-1095
chromosome_14	4153680	4153681	31546	-	chromosome_14	five_prime_UTR	4154776	4155163	+	ID=Cre14.g634365.t1.1.v5.5.five_prime_UTR.1;Parent=Cre14.g634365.t1.1.v5.5;pacid=30776651	-1095
chromosome_14	4153681	4153682	40370	-	chromosome_14	five_prime_UTR	4154776	4155163	+	ID=Cre14.g634365.t1.1.v5.5.five_prime_UTR.1;Parent=Cre14.g634365.t1.1.v5.5;pacid=30776651	-1094
chromosome_14	4153682	4153683	8855	-	chromosome_14	five_prime_UTR	4154776	4155163	+	ID=Cre14.g634365.t1.1.v5.5.five_prime_UTR.1;Parent=Cre14.g634365.t1.1.v5.5;pacid=30776651	-1093
chromosome_14	4153683	4153684	346	-	chromosome_14	five_prime_UTR	4154776	4155163	+	ID=Cre14.g634365.t1.1.v5.5.five_prime_UTR.1;Parent=Cre14.g634365.t1.1.v5.5;pacid=30776651	-1092
chromosome_14	4153684	4153685	6367	-	chromosome_14	five_prime_UTR	4154776	4155163	+	ID=Cre14.g634365.t1.1.v5.5.five_prime_UTR.1;Parent=Cre14.g634365.t1.1.v5.5;pacid=30776651	-1091
chromosome_14	4153685	4153686	46829	-	chromosome_14	five_prime_UTR	4154776	4155163	+	ID=Cre14.g634365.t1.1.v5.5.five_prime_UTR.1;Parent=Cre14.g634365.t1.1.v5.5;pacid=30776651	-1090
chromosome_14	4153686	4153687	87	-	chromosome_14	five_prime_UTR	4154776	4155163	+	ID=Cre14.g634365.t1.1.v5.5.five_prime_UTR.1;Parent=Cre14.g634365.t1.1.v5.5;pacid=30776651	-1089
chromosome_14	4153687	4153688	684	-	chromosome_14	five_prime_UTR	4154776	4155163	+	ID=Cre14.g634365.t1.1.v5.5.five_prime_UTR.1;Parent=Cre14.g634365.t1.1.v5.5;pacid=30776651	-1088
chromosome_14	4153688	4153689	2059	-	chromosome_14	five_prime_UTR	4154776	4155163	+	ID=Cre14.g634365.t1.1.v5.5.five_prime_UTR.1;Parent=Cre14.g634365.t1.1.v5.5;pacid=30776651	-1087
chromosome_14	4153689	4153690	19989	-	chromosome_14	five_prime_UTR	4154776	4155163	+	ID=Cre14.g634365.t1.1.v5.5.five_prime_UTR.1;Parent=Cre14.g634365.t1.1.v5.5;pacid=30776651	-1086
chromosome_14	4153690	4153691	762	-	chromosome_14	five_prime_UTR	4154776	4155163	+	ID=Cre14.g634365.t1.1.v5.5.five_prime_UTR.1;Parent=Cre14.g634365.t1.1.v5.5;pacid=30776651	-1085
chromosome_14	4153691	4153692	146	-	chromosome_14	five_prime_UTR	4154776	4155163	+	ID=Cre14.g634365.t1.1.v5.5.five_prime_UTR.1;Parent=Cre14.g634365.t1.1.v5.5;pacid=30776651	-1084
chromosome_14	4153692	4153693	2156	-	chromosome_14	five_prime_UTR	4154776	4155163	+	ID=Cre14.g634365.t1.1.v5.5.five_prime_UTR.1;Parent=Cre14.g634365.t1.1.v5.5;pacid=30776651	-1083
chromosome_14	4153693	4153694	259	-	chromosome_14	five_prime_UTR	4154776	4155163	+	ID=Cre14.g634365.t1.1.v5.5.five_prime_UTR.1;Parent=Cre14.g634365.t1.1.v5.5;pacid=30776651	-1082
chromosome_14	4153694	4153695	86	-	chromosome_14	five_prime_UTR	4154776	4155163	+	ID=Cre14.g634365.t1.1.v5.5.five_prime_UTR.1;Parent=Cre14.g634365.t1.1.v5.5;pacid=30776651	-1081
chromosome_14	4153695	4153696	65	-	chromosome_14	five_prime_UTR	4154776	4155163	+	ID=Cre14.g634365.t1.1.v5.5.five_prime_UTR.1;Parent=Cre14.g634365.t1.1.v5.5;pacid=30776651	-1080
chromosome_14	4153696	4153697	27	-	chromosome_14	five_prime_UTR	4154776	4155163	+	ID=Cre14.g634365.t1.1.v5.5.five_prime_UTR.1;Parent=Cre14.g634365.t1.1.v5.5;pacid=30776651	-1079
chromosome_14	4153697	4153698	18	-	chromosome_14	five_prime_UTR	4154776	4155163	+	ID=Cre14.g634365.t1.1.v5.5.five_prime_UTR.1;Parent=Cre14.g634365.t1.1.v5.5;pacid=30776651	-1078
chromosome_14	4153698	4153699	29	-	chromosome_14	five_prime_UTR	4154776	4155163	+	ID=Cre14.g634365.t1.1.v5.5.five_prime_UTR.1;Parent=Cre14.g634365.t1.1.v5.5;pacid=30776651	-1077
chromosome_14	4153699	4153700	101	-	chromosome_14	five_prime_UTR	4154776	4155163	+	ID=Cre14.g634365.t1.1.v5.5.five_prime_UTR.1;Parent=Cre14.g634365.t1.1.v5.5;pacid=30776651	-1076
chromosome_8	1946372	1946373	20	-	chromosome_8	five_prime_UTR	1947449	1947504	+	ID=Cre08.g367500.t1.1.v5.5.five_prime_UTR.1;Parent=Cre08.g367500.t1.1.v5.5;pacid=30774166	-1076
chromosome_14	4153700	4153701	101	-	chromosome_14	five_prime_UTR	4154776	4155163	+	ID=Cre14.g634365.t1.1.v5.5.five_prime_UTR.1;Parent=Cre14.g634365.t1.1.v5.5;pacid=30776651	-1075
chromosome_14	4153701	4153702	87	-	chromosome_14	five_prime_UTR	4154776	4155163	+	ID=Cre14.g634365.t1.1.v5.5.five_prime_UTR.1;Parent=Cre14.g634365.t1.1.v5.5;pacid=30776651	-1074
chromosome_14	4153702	4153703	39	-	chromosome_14	five_prime_UTR	4154776	4155163	+	ID=Cre14.g634365.t1.1.v5.5.five_prime_UTR.1;Parent=Cre14.g634365.t1.1.v5.5;pacid=30776651	-1073
chromosome_14	4153703	4153704	17	-	chromosome_14	five_prime_UTR	4154776	4155163	+	ID=Cre14.g634365.t1.1.v5.5.five_prime_UTR.1;Parent=Cre14.g634365.t1.1.v5.5;pacid=30776651	-1072
chromosome_8	1946376	1946377	20	-	chromosome_8	five_prime_UTR	1947449	1947504	+	ID=Cre08.g367500.t1.1.v5.5.five_prime_UTR.1;Parent=Cre08.g367500.t1.1.v5.5;pacid=30774166	-1072
chromosome_14	4153704	4153705	13	-	chromosome_14	five_prime_UTR	4154776	4155163	+	ID=Cre14.g634365.t1.1.v5.5.five_prime_UTR.1;Parent=Cre14.g634365.t1.1.v5.5;pacid=30776651	-1071
chromosome_14	4153707	4153708	15	-	chromosome_14	five_prime_UTR	4154776	4155163	+	ID=Cre14.g634365.t1.1.v5.5.five_prime_UTR.1;Parent=Cre14.g634365.t1.1.v5.5;pacid=30776651	-1068
chromosome_14	4153708	4153709	44	-	chromosome_14	five_prime_UTR	4154776	4155163	+	ID=Cre14.g634365.t1.1.v5.5.five_prime_UTR.1;Parent=Cre14.g634365.t1.1.v5.5;pacid=30776651	-1067
chromosome_14	4153709	4153710	38	-	chromosome_14	five_prime_UTR	4154776	4155163	+	ID=Cre14.g634365.t1.1.v5.5.five_prime_UTR.1;Parent=Cre14.g634365.t1.1.v5.5;pacid=30776651	-1066
chromosome_14	4153710	4153711	32	-	chromosome_14	five_prime_UTR	4154776	4155163	+	ID=Cre14.g634365.t1.1.v5.5.five_prime_UTR.1;Parent=Cre14.g634365.t1.1.v5.5;pacid=30776651	-1065
chromosome_14	4153711	4153712	74	-	chromosome_14	five_prime_UTR	4154776	4155163	+	ID=Cre14.g634365.t1.1.v5.5.five_prime_UTR.1;Parent=Cre14.g634365.t1.1.v5.5;pacid=30776651	-1064
chromosome_14	4153712	4153713	17	-	chromosome_14	five_prime_UTR	4154776	4155163	+	ID=Cre14.g634365.t1.1.v5.5.five_prime_UTR.1;Parent=Cre14.g634365.t1.1.v5.5;pacid=30776651	-1063
chromosome_14	2770078	2770079	98	-	chromosome_14	five_prime_UTR	2771129	2771758	+	ID=Cre14.g627200.t1.1.v5.5.five_prime_UTR.1;Parent=Cre14.g627200.t1.1.v5.5;pacid=30776114	-1050
chromosome_14	2770079	2770080	122	-	chromosome_14	five_prime_UTR	2771129	2771758	+	ID=Cre14.g627200.t1.1.v5.5.five_prime_UTR.1;Parent=Cre14.g627200.t1.1.v5.5;pacid=30776114	-1049
chromosome_14	2770080	2770081	381	-	chromosome_14	five_prime_UTR	2771129	2771758	+	ID=Cre14.g627200.t1.1.v5.5.five_prime_UTR.1;Parent=Cre14.g627200.t1.1.v5.5;pacid=30776114	-1048
chromosome_14	2770081	2770082	969	-	chromosome_14	five_prime_UTR	2771129	2771758	+	ID=Cre14.g627200.t1.1.v5.5.five_prime_UTR.1;Parent=Cre14.g627200.t1.1.v5.5;pacid=30776114	-1047
chromosome_14	2770082	2770083	10	-	chromosome_14	five_prime_UTR	2771129	2771758	+	ID=Cre14.g627200.t1.1.v5.5.five_prime_UTR.1;Parent=Cre14.g627200.t1.1.v5.5;pacid=30776114	-1046
chromosome_14	2770083	2770084	49	-	chromosome_14	five_prime_UTR	2771129	2771758	+	ID=Cre14.g627200.t1.1.v5.5.five_prime_UTR.1;Parent=Cre14.g627200.t1.1.v5.5;pacid=30776114	-1045
chromosome_14	2770085	2770086	11	-	chromosome_14	five_prime_UTR	2771129	2771758	+	ID=Cre14.g627200.t1.1.v5.5.five_prime_UTR.1;Parent=Cre14.g627200.t1.1.v5.5;pacid=30776114	-1043
chromosome_14	4153733	4153734	37	-	chromosome_14	five_prime_UTR	4154776	4155163	+	ID=Cre14.g634365.t1.1.v5.5.five_prime_UTR.1;Parent=Cre14.g634365.t1.1.v5.5;pacid=30776651	-1042
chromosome_14	4153734	4153735	20	-	chromosome_14	five_prime_UTR	4154776	4155163	+	ID=Cre14.g634365.t1.1.v5.5.five_prime_UTR.1;Parent=Cre14.g634365.t1.1.v5.5;pacid=30776651	-1041
chromosome_14	4153735	4153736	546	-	chromosome_14	five_prime_UTR	4154776	4155163	+	ID=Cre14.g634365.t1.1.v5.5.five_prime_UTR.1;Parent=Cre14.g634365.t1.1.v5.5;pacid=30776651	-1040
chromosome_14	4153753	4153754	24	-	chromosome_14	five_prime_UTR	4154776	4155163	+	ID=Cre14.g634365.t1.1.v5.5.five_prime_UTR.1;Parent=Cre14.g634365.t1.1.v5.5;pacid=30776651	-1022
chromosome_14	4153765	4153766	14	-	chromosome_14	five_prime_UTR	4154776	4155163	+	ID=Cre14.g634365.t1.1.v5.5.five_prime_UTR.1;Parent=Cre14.g634365.t1.1.v5.5;pacid=30776651	-1010
chromosome_14	4153766	4153767	12	-	chromosome_14	five_prime_UTR	4154776	4155163	+	ID=Cre14.g634365.t1.1.v5.5.five_prime_UTR.1;Parent=Cre14.g634365.t1.1.v5.5;pacid=30776651	-1009
chromosome_14	4153767	4153768	42	-	chromosome_14	five_prime_UTR	4154776	4155163	+	ID=Cre14.g634365.t1.1.v5.5.five_prime_UTR.1;Parent=Cre14.g634365.t1.1.v5.5;pacid=30776651	-1008
chromosome_14	4153768	4153769	387	-	chromosome_14	five_prime_UTR	4154776	4155163	+	ID=Cre14.g634365.t1.1.v5.5.five_prime_UTR.1;Parent=Cre14.g634365.t1.1.v5.5;pacid=30776651	-1007
chromosome_14	4153769	4153770	2745	-	chromosome_14	five_prime_UTR	4154776	4155163	+	ID=Cre14.g634365.t1.1.v5.5.five_prime_UTR.1;Parent=Cre14.g634365.t1.1.v5.5;pacid=30776651	-1006
chromosome_13	4844467	4844468	10	-	chromosome_13	five_prime_UTR	4845472	4845609	+	ID=Cre13.g605404.t1.1.v5.5.five_prime_UTR.1;Parent=Cre13.g605404.t1.1.v5.5;pacid=30784317	-1004
chromosome_14	4153773	4153774	12	-	chromosome_14	five_prime_UTR	4154776	4155163	+	ID=Cre14.g634365.t1.1.v5.5.five_prime_UTR.1;Parent=Cre14.g634365.t1.1.v5.5;pacid=30776651	-1002
chromosome_14	4153779	4153780	12	-	chromosome_14	five_prime_UTR	4154776	4155163	+	ID=Cre14.g634365.t1.1.v5.5.five_prime_UTR.1;Parent=Cre14.g634365.t1.1.v5.5;pacid=30776651	-996
chromosome_14	4153780	4153781	31	-	chromosome_14	five_prime_UTR	4154776	4155163	+	ID=Cre14.g634365.t1.1.v5.5.five_prime_UTR.1;Parent=Cre14.g634365.t1.1.v5.5;pacid=30776651	-995
chromosome_11	614528	614529	13	+	chromosome_11	five_prime_UTR	613460	613535	-	ID=Cre11.g467612.t1.1.v5.5.five_prime_UTR.1;Parent=Cre11.g467612.t1.1.v5.5;pacid=30775917	-994
chromosome_14	4153781	4153782	842	-	chromosome_14	five_prime_UTR	4154776	4155163	+	ID=Cre14.g634365.t1.1.v5.5.five_prime_UTR.1;Parent=Cre14.g634365.t1.1.v5.5;pacid=30776651	-994
chromosome_14	4153783	4153784	10	-	chromosome_14	five_prime_UTR	4154776	4155163	+	ID=Cre14.g634365.t1.1.v5.5.five_prime_UTR.1;Parent=Cre14.g634365.t1.1.v5.5;pacid=30776651	-992
chromosome_14	4153784	4153785	39	-	chromosome_14	five_prime_UTR	4154776	4155163	+	ID=Cre14.g634365.t1.1.v5.5.five_prime_UTR.1;Parent=Cre14.g634365.t1.1.v5.5;pacid=30776651	-991
chromosome_14	4153785	4153786	60	-	chromosome_14	five_prime_UTR	4154776	4155163	+	ID=Cre14.g634365.t1.1.v5.5.five_prime_UTR.1;Parent=Cre14.g634365.t1.1.v5.5;pacid=30776651	-990
chromosome_10	5674580	5674581	22	+	chromosome_10	five_prime_UTR	5673368	5673592	-	ID=Cre10.g460532.t1.1.v5.5.five_prime_UTR.1;Parent=Cre10.g460532.t1.1.v5.5;pacid=30790093	-989
chromosome_14	4153787	4153788	20	-	chromosome_14	five_prime_UTR	4154776	4155163	+	ID=Cre14.g634365.t1.1.v5.5.five_prime_UTR.1;Parent=Cre14.g634365.t1.1.v5.5;pacid=30776651	-988
chromosome_11	3756231	3756232	14	-	chromosome_11	five_prime_UTR	3757217	3757353	+	ID=Cre11.g483033.t1.1.v5.5.five_prime_UTR.1;Parent=Cre11.g483033.t1.1.v5.5;pacid=30775543	-985
chromosome_14	4153792	4153793	31	-	chromosome_14	five_prime_UTR	4154776	4155163	+	ID=Cre14.g634365.t1.1.v5.5.five_prime_UTR.1;Parent=Cre14.g634365.t1.1.v5.5;pacid=30776651	-983
chromosome_14	4153793	4153794	41	-	chromosome_14	five_prime_UTR	4154776	4155163	+	ID=Cre14.g634365.t1.1.v5.5.five_prime_UTR.1;Parent=Cre14.g634365.t1.1.v5.5;pacid=30776651	-982
chromosome_14	4153794	4153795	11	-	chromosome_14	five_prime_UTR	4154776	4155163	+	ID=Cre14.g634365.t1.1.v5.5.five_prime_UTR.1;Parent=Cre14.g634365.t1.1.v5.5;pacid=30776651	-981
chromosome_14	4153795	4153796	77	-	chromosome_14	five_prime_UTR	4154776	4155163	+	ID=Cre14.g634365.t1.1.v5.5.five_prime_UTR.1;Parent=Cre14.g634365.t1.1.v5.5;pacid=30776651	-980
chromosome_14	1390389	1390390	68	-	chromosome_14	five_prime_UTR	1391369	1391485	+	ID=Cre14.g617350.t1.1.v5.5.five_prime_UTR.1;Parent=Cre14.g617350.t1.1.v5.5;pacid=30776560	-979
chromosome_14	4153796	4153797	40	-	chromosome_14	five_prime_UTR	4154776	4155163	+	ID=Cre14.g634365.t1.1.v5.5.five_prime_UTR.1;Parent=Cre14.g634365.t1.1.v5.5;pacid=30776651	-979
chromosome_14	4153797	4153798	2246	-	chromosome_14	five_prime_UTR	4154776	4155163	+	ID=Cre14.g634365.t1.1.v5.5.five_prime_UTR.1;Parent=Cre14.g634365.t1.1.v5.5;pacid=30776651	-978
chromosome_14	4153798	4153799	1447	-	chromosome_14	five_prime_UTR	4154776	4155163	+	ID=Cre14.g634365.t1.1.v5.5.five_prime_UTR.1;Parent=Cre14.g634365.t1.1.v5.5;pacid=30776651	-977
chromosome_14	4153799	4153800	889	-	chromosome_14	five_prime_UTR	4154776	4155163	+	ID=Cre14.g634365.t1.1.v5.5.five_prime_UTR.1;Parent=Cre14.g634365.t1.1.v5.5;pacid=30776651	-976
chromosome_14	4153800	4153801	34760	-	chromosome_14	five_prime_UTR	4154776	4155163	+	ID=Cre14.g634365.t1.1.v5.5.five_prime_UTR.1;Parent=Cre14.g634365.t1.1.v5.5;pacid=30776651	-975
chromosome_14	4153801	4153802	59	-	chromosome_14	five_prime_UTR	4154776	4155163	+	ID=Cre14.g634365.t1.1.v5.5.five_prime_UTR.1;Parent=Cre14.g634365.t1.1.v5.5;pacid=30776651	-974
chromosome_14	4153802	4153803	23	-	chromosome_14	five_prime_UTR	4154776	4155163	+	ID=Cre14.g634365.t1.1.v5.5.five_prime_UTR.1;Parent=Cre14.g634365.t1.1.v5.5;pacid=30776651	-973
chromosome_14	4153803	4153804	961	-	chromosome_14	five_prime_UTR	4154776	4155163	+	ID=Cre14.g634365.t1.1.v5.5.five_prime_UTR.1;Parent=Cre14.g634365.t1.1.v5.5;pacid=30776651	-972
chromosome_14	4153804	4153805	10	-	chromosome_14	five_prime_UTR	4154776	4155163	+	ID=Cre14.g634365.t1.1.v5.5.five_prime_UTR.1;Parent=Cre14.g634365.t1.1.v5.5;pacid=30776651	-971
chromosome_14	4153805	4153806	78	-	chromosome_14	five_prime_UTR	4154776	4155163	+	ID=Cre14.g634365.t1.1.v5.5.five_prime_UTR.1;Parent=Cre14.g634365.t1.1.v5.5;pacid=30776651	-970
chromosome_14	4153806	4153807	230	-	chromosome_14	five_prime_UTR	4154776	4155163	+	ID=Cre14.g634365.t1.1.v5.5.five_prime_UTR.1;Parent=Cre14.g634365.t1.1.v5.5;pacid=30776651	-969
chromosome_14	4153807	4153808	227	-	chromosome_14	five_prime_UTR	4154776	4155163	+	ID=Cre14.g634365.t1.1.v5.5.five_prime_UTR.1;Parent=Cre14.g634365.t1.1.v5.5;pacid=30776651	-968
chromosome_14	4153810	4153811	42	-	chromosome_14	five_prime_UTR	4154776	4155163	+	ID=Cre14.g634365.t1.1.v5.5.five_prime_UTR.1;Parent=Cre14.g634365.t1.1.v5.5;pacid=30776651	-965
chromosome_14	4153818	4153819	20	-	chromosome_14	five_prime_UTR	4154776	4155163	+	ID=Cre14.g634365.t1.1.v5.5.five_prime_UTR.1;Parent=Cre14.g634365.t1.1.v5.5;pacid=30776651	-957
chromosome_14	4153819	4153820	45	-	chromosome_14	five_prime_UTR	4154776	4155163	+	ID=Cre14.g634365.t1.1.v5.5.five_prime_UTR.1;Parent=Cre14.g634365.t1.1.v5.5;pacid=30776651	-956
chromosome_14	4153821	4153822	10	-	chromosome_14	five_prime_UTR	4154776	4155163	+	ID=Cre14.g634365.t1.1.v5.5.five_prime_UTR.1;Parent=Cre14.g634365.t1.1.v5.5;pacid=30776651	-954
chromosome_14	4153822	4153823	70	-	chromosome_14	five_prime_UTR	4154776	4155163	+	ID=Cre14.g634365.t1.1.v5.5.five_prime_UTR.1;Parent=Cre14.g634365.t1.1.v5.5;pacid=30776651	-953
chromosome_1	7534843	7534844	20	-	chromosome_1	five_prime_UTR	7535792	7535913	+	ID=Cre01.g054300.t1.1.v5.5.five_prime_UTR.1;Parent=Cre01.g054300.t1.1.v5.5;pacid=30788912	-948
chromosome_14	4153828	4153829	52	-	chromosome_14	five_prime_UTR	4154776	4155163	+	ID=Cre14.g634365.t1.1.v5.5.five_prime_UTR.1;Parent=Cre14.g634365.t1.1.v5.5;pacid=30776651	-947
chromosome_13	2131830	2131831	44	-	chromosome_13	five_prime_UTR	2132776	2133058	+	ID=Cre13.g577950.t1.2.v5.5.five_prime_UTR.1;Parent=Cre13.g577950.t1.2.v5.5;pacid=30784116	-945
chromosome_13	2131831	2131832	25	-	chromosome_13	five_prime_UTR	2132776	2133058	+	ID=Cre13.g577950.t1.2.v5.5.five_prime_UTR.1;Parent=Cre13.g577950.t1.2.v5.5;pacid=30784116	-944
chromosome_13	2131832	2131833	89	-	chromosome_13	five_prime_UTR	2132776	2133058	+	ID=Cre13.g577950.t1.2.v5.5.five_prime_UTR.1;Parent=Cre13.g577950.t1.2.v5.5;pacid=30784116	-943
chromosome_scaffold_21	175215	175216	14	-	chromosome_scaffold_21	five_prime_UTR	176156	176405	+	ID=Cre21.g753297.t1.1.v5.5.five_prime_UTR.1;Parent=Cre21.g753297.t1.1.v5.5;pacid=30791614	-940
chromosome_14	4153852	4153853	11	-	chromosome_14	five_prime_UTR	4154776	4155163	+	ID=Cre14.g634365.t1.1.v5.5.five_prime_UTR.1;Parent=Cre14.g634365.t1.1.v5.5;pacid=30776651	-923
chromosome_10	6288398	6288399	10	-	chromosome_10	five_prime_UTR	6289321	6289484	+	ID=Cre10.g465050.t1.1.v5.5.five_prime_UTR.1;Parent=Cre10.g465050.t1.1.v5.5;pacid=30790456	-922
chromosome_14	4153853	4153854	720	-	chromosome_14	five_prime_UTR	4154776	4155163	+	ID=Cre14.g634365.t1.1.v5.5.five_prime_UTR.1;Parent=Cre14.g634365.t1.1.v5.5;pacid=30776651	-922
chromosome_14	4153855	4153856	190	-	chromosome_14	five_prime_UTR	4154776	4155163	+	ID=Cre14.g634365.t1.1.v5.5.five_prime_UTR.1;Parent=Cre14.g634365.t1.1.v5.5;pacid=30776651	-920
chromosome_14	4153860	4153861	12	-	chromosome_14	five_prime_UTR	4154776	4155163	+	ID=Cre14.g634365.t1.1.v5.5.five_prime_UTR.1;Parent=Cre14.g634365.t1.1.v5.5;pacid=30776651	-915
chromosome_14	4153865	4153866	10	-	chromosome_14	five_prime_UTR	4154776	4155163	+	ID=Cre14.g634365.t1.1.v5.5.five_prime_UTR.1;Parent=Cre14.g634365.t1.1.v5.5;pacid=30776651	-910
chromosome_14	4153866	4153867	24	-	chromosome_14	five_prime_UTR	4154776	4155163	+	ID=Cre14.g634365.t1.1.v5.5.five_prime_UTR.1;Parent=Cre14.g634365.t1.1.v5.5;pacid=30776651	-909
chromosome_14	4153873	4153874	12	-	chromosome_14	five_prime_UTR	4154776	4155163	+	ID=Cre14.g634365.t1.1.v5.5.five_prime_UTR.1;Parent=Cre14.g634365.t1.1.v5.5;pacid=30776651	-902
chromosome_3	3717001	3717002	18	+	chromosome_3	five_prime_UTR	3715749	3716106	-	ID=Cre03.g169500.t1.2.v5.5.five_prime_UTR.1;Parent=Cre03.g169500.t1.2.v5.5;pacid=30786962	-896
chromosome_14	1877903	1877904	56	+	chromosome_14	five_prime_UTR	1876532	1877024	-	ID=Cre14.g620702.t1.1.v5.5.five_prime_UTR.1;Parent=Cre14.g620702.t1.1.v5.5;pacid=30776189	-880
chromosome_14	1877901	1877902	13	+	chromosome_14	five_prime_UTR	1876532	1877024	-	ID=Cre14.g620702.t1.1.v5.5.five_prime_UTR.1;Parent=Cre14.g620702.t1.1.v5.5;pacid=30776189	-878
chromosome_14	4153909	4153910	24	-	chromosome_14	five_prime_UTR	4154776	4155163	+	ID=Cre14.g634365.t1.1.v5.5.five_prime_UTR.1;Parent=Cre14.g634365.t1.1.v5.5;pacid=30776651	-866
chromosome_14	4153911	4153912	68	-	chromosome_14	five_prime_UTR	4154776	4155163	+	ID=Cre14.g634365.t1.1.v5.5.five_prime_UTR.1;Parent=Cre14.g634365.t1.1.v5.5;pacid=30776651	-864
chromosome_14	4153912	4153913	116	-	chromosome_14	five_prime_UTR	4154776	4155163	+	ID=Cre14.g634365.t1.1.v5.5.five_prime_UTR.1;Parent=Cre14.g634365.t1.1.v5.5;pacid=30776651	-863
chromosome_14	4153913	4153914	199	-	chromosome_14	five_prime_UTR	4154776	4155163	+	ID=Cre14.g634365.t1.1.v5.5.five_prime_UTR.1;Parent=Cre14.g634365.t1.1.v5.5;pacid=30776651	-862
chromosome_14	4153914	4153915	7443	-	chromosome_14	five_prime_UTR	4154776	4155163	+	ID=Cre14.g634365.t1.1.v5.5.five_prime_UTR.1;Parent=Cre14.g634365.t1.1.v5.5;pacid=30776651	-861
chromosome_14	4153915	4153916	28	-	chromosome_14	five_prime_UTR	4154776	4155163	+	ID=Cre14.g634365.t1.1.v5.5.five_prime_UTR.1;Parent=Cre14.g634365.t1.1.v5.5;pacid=30776651	-860
chromosome_14	4153916	4153917	9300	-	chromosome_14	five_prime_UTR	4154776	4155163	+	ID=Cre14.g634365.t1.1.v5.5.five_prime_UTR.1;Parent=Cre14.g634365.t1.1.v5.5;pacid=30776651	-859
chromosome_7	4285127	4285128	21	+	chromosome_7	five_prime_UTR	4284131	4284270	-	ID=Cre07.g341550.t1.2.v5.5.five_prime_UTR.1;Parent=Cre07.g341550.t1.2.v5.5;pacid=30774686	-858
chromosome_14	4153919	4153920	90	-	chromosome_14	five_prime_UTR	4154776	4155163	+	ID=Cre14.g634365.t1.1.v5.5.five_prime_UTR.1;Parent=Cre14.g634365.t1.1.v5.5;pacid=30776651	-856
chromosome_14	4153920	4153921	32	-	chromosome_14	five_prime_UTR	4154776	4155163	+	ID=Cre14.g634365.t1.1.v5.5.five_prime_UTR.1;Parent=Cre14.g634365.t1.1.v5.5;pacid=30776651	-855
chromosome_14	4153921	4153922	1614	-	chromosome_14	five_prime_UTR	4154776	4155163	+	ID=Cre14.g634365.t1.1.v5.5.five_prime_UTR.1;Parent=Cre14.g634365.t1.1.v5.5;pacid=30776651	-854
chromosome_14	4153924	4153925	10	-	chromosome_14	five_prime_UTR	4154776	4155163	+	ID=Cre14.g634365.t1.1.v5.5.five_prime_UTR.1;Parent=Cre14.g634365.t1.1.v5.5;pacid=30776651	-851
chromosome_14	4153925	4153926	22	-	chromosome_14	five_prime_UTR	4154776	4155163	+	ID=Cre14.g634365.t1.1.v5.5.five_prime_UTR.1;Parent=Cre14.g634365.t1.1.v5.5;pacid=30776651	-850
chromosome_14	4153933	4153934	18	-	chromosome_14	five_prime_UTR	4154776	4155163	+	ID=Cre14.g634365.t1.1.v5.5.five_prime_UTR.1;Parent=Cre14.g634365.t1.1.v5.5;pacid=30776651	-842
chromosome_12	2721378	2721379	13	-	chromosome_12	five_prime_UTR	2722220	2722426	+	ID=Cre12.g503500.t1.1.v5.5.five_prime_UTR.1;Parent=Cre12.g503500.t1.1.v5.5;pacid=30793090	-841
chromosome_17	390809	390810	10	-	chromosome_17	five_prime_UTR	391648	391780	+	ID=Cre17.g698750.t1.2.v5.5.five_prime_UTR.1;Parent=Cre17.g698750.t1.2.v5.5;pacid=30782670	-838
chromosome_14	4153938	4153939	19	-	chromosome_14	five_prime_UTR	4154776	4155163	+	ID=Cre14.g634365.t1.1.v5.5.five_prime_UTR.1;Parent=Cre14.g634365.t1.1.v5.5;pacid=30776651	-837
chromosome_14	4153939	4153940	10	-	chromosome_14	five_prime_UTR	4154776	4155163	+	ID=Cre14.g634365.t1.1.v5.5.five_prime_UTR.1;Parent=Cre14.g634365.t1.1.v5.5;pacid=30776651	-836
chromosome_17	390811	390812	53	-	chromosome_17	five_prime_UTR	391648	391780	+	ID=Cre17.g698750.t1.2.v5.5.five_prime_UTR.1;Parent=Cre17.g698750.t1.2.v5.5;pacid=30782670	-836
chromosome_14	4153940	4153941	75	-	chromosome_14	five_prime_UTR	4154776	4155163	+	ID=Cre14.g634365.t1.1.v5.5.five_prime_UTR.1;Parent=Cre14.g634365.t1.1.v5.5;pacid=30776651	-835
chromosome_17	390812	390813	145	-	chromosome_17	five_prime_UTR	391648	391780	+	ID=Cre17.g698750.t1.2.v5.5.five_prime_UTR.1;Parent=Cre17.g698750.t1.2.v5.5;pacid=30782670	-835
chromosome_14	4153941	4153942	81	-	chromosome_14	five_prime_UTR	4154776	4155163	+	ID=Cre14.g634365.t1.1.v5.5.five_prime_UTR.1;Parent=Cre14.g634365.t1.1.v5.5;pacid=30776651	-834
chromosome_17	390813	390814	63	-	chromosome_17	five_prime_UTR	391648	391780	+	ID=Cre17.g698750.t1.2.v5.5.five_prime_UTR.1;Parent=Cre17.g698750.t1.2.v5.5;pacid=30782670	-834
chromosome_14	4153942	4153943	112	-	chromosome_14	five_prime_UTR	4154776	4155163	+	ID=Cre14.g634365.t1.1.v5.5.five_prime_UTR.1;Parent=Cre14.g634365.t1.1.v5.5;pacid=30776651	-833
chromosome_17	390814	390815	189	-	chromosome_17	five_prime_UTR	391648	391780	+	ID=Cre17.g698750.t1.2.v5.5.five_prime_UTR.1;Parent=Cre17.g698750.t1.2.v5.5;pacid=30782670	-833
chromosome_14	4153943	4153944	333	-	chromosome_14	five_prime_UTR	4154776	4155163	+	ID=Cre14.g634365.t1.1.v5.5.five_prime_UTR.1;Parent=Cre14.g634365.t1.1.v5.5;pacid=30776651	-832
chromosome_17	390815	390816	19	-	chromosome_17	five_prime_UTR	391648	391780	+	ID=Cre17.g698750.t1.2.v5.5.five_prime_UTR.1;Parent=Cre17.g698750.t1.2.v5.5;pacid=30782670	-832
chromosome_14	4153944	4153945	54	-	chromosome_14	five_prime_UTR	4154776	4155163	+	ID=Cre14.g634365.t1.1.v5.5.five_prime_UTR.1;Parent=Cre14.g634365.t1.1.v5.5;pacid=30776651	-831
chromosome_14	4153945	4153946	98	-	chromosome_14	five_prime_UTR	4154776	4155163	+	ID=Cre14.g634365.t1.1.v5.5.five_prime_UTR.1;Parent=Cre14.g634365.t1.1.v5.5;pacid=30776651	-830
chromosome_14	4153946	4153947	152	-	chromosome_14	five_prime_UTR	4154776	4155163	+	ID=Cre14.g634365.t1.1.v5.5.five_prime_UTR.1;Parent=Cre14.g634365.t1.1.v5.5;pacid=30776651	-829
chromosome_14	4153947	4153948	15	-	chromosome_14	five_prime_UTR	4154776	4155163	+	ID=Cre14.g634365.t1.1.v5.5.five_prime_UTR.1;Parent=Cre14.g634365.t1.1.v5.5;pacid=30776651	-828
chromosome_14	4153948	4153949	10	-	chromosome_14	five_prime_UTR	4154776	4155163	+	ID=Cre14.g634365.t1.1.v5.5.five_prime_UTR.1;Parent=Cre14.g634365.t1.1.v5.5;pacid=30776651	-827
chromosome_14	4153949	4153950	26	-	chromosome_14	five_prime_UTR	4154776	4155163	+	ID=Cre14.g634365.t1.1.v5.5.five_prime_UTR.1;Parent=Cre14.g634365.t1.1.v5.5;pacid=30776651	-826
chromosome_14	4153950	4153951	39	-	chromosome_14	five_prime_UTR	4154776	4155163	+	ID=Cre14.g634365.t1.1.v5.5.five_prime_UTR.1;Parent=Cre14.g634365.t1.1.v5.5;pacid=30776651	-825
chromosome_14	4153951	4153952	26	-	chromosome_14	five_prime_UTR	4154776	4155163	+	ID=Cre14.g634365.t1.1.v5.5.five_prime_UTR.1;Parent=Cre14.g634365.t1.1.v5.5;pacid=30776651	-824
chromosome_14	4153952	4153953	105	-	chromosome_14	five_prime_UTR	4154776	4155163	+	ID=Cre14.g634365.t1.1.v5.5.five_prime_UTR.1;Parent=Cre14.g634365.t1.1.v5.5;pacid=30776651	-823
chromosome_14	4153953	4153954	215	-	chromosome_14	five_prime_UTR	4154776	4155163	+	ID=Cre14.g634365.t1.1.v5.5.five_prime_UTR.1;Parent=Cre14.g634365.t1.1.v5.5;pacid=30776651	-822
chromosome_14	4153954	4153955	6959	-	chromosome_14	five_prime_UTR	4154776	4155163	+	ID=Cre14.g634365.t1.1.v5.5.five_prime_UTR.1;Parent=Cre14.g634365.t1.1.v5.5;pacid=30776651	-821
chromosome_14	4153956	4153957	45	-	chromosome_14	five_prime_UTR	4154776	4155163	+	ID=Cre14.g634365.t1.1.v5.5.five_prime_UTR.1;Parent=Cre14.g634365.t1.1.v5.5;pacid=30776651	-819
chromosome_14	4153957	4153958	80	-	chromosome_14	five_prime_UTR	4154776	4155163	+	ID=Cre14.g634365.t1.1.v5.5.five_prime_UTR.1;Parent=Cre14.g634365.t1.1.v5.5;pacid=30776651	-818
chromosome_14	4153958	4153959	23	-	chromosome_14	five_prime_UTR	4154776	4155163	+	ID=Cre14.g634365.t1.1.v5.5.five_prime_UTR.1;Parent=Cre14.g634365.t1.1.v5.5;pacid=30776651	-817
chromosome_14	4153959	4153960	176	-	chromosome_14	five_prime_UTR	4154776	4155163	+	ID=Cre14.g634365.t1.1.v5.5.five_prime_UTR.1;Parent=Cre14.g634365.t1.1.v5.5;pacid=30776651	-816
chromosome_3	3035859	3035860	29	-	chromosome_3	five_prime_UTR	3036676	3036773	+	ID=Cre03.g164150.t1.1.v5.5.five_prime_UTR.1;Parent=Cre03.g164150.t1.1.v5.5;pacid=30787796	-816
chromosome_14	4153960	4153961	348	-	chromosome_14	five_prime_UTR	4154776	4155163	+	ID=Cre14.g634365.t1.1.v5.5.five_prime_UTR.1;Parent=Cre14.g634365.t1.1.v5.5;pacid=30776651	-815
chromosome_3	3035860	3035861	27	-	chromosome_3	five_prime_UTR	3036676	3036773	+	ID=Cre03.g164150.t1.1.v5.5.five_prime_UTR.1;Parent=Cre03.g164150.t1.1.v5.5;pacid=30787796	-815
chromosome_14	4153961	4153962	3818	-	chromosome_14	five_prime_UTR	4154776	4155163	+	ID=Cre14.g634365.t1.1.v5.5.five_prime_UTR.1;Parent=Cre14.g634365.t1.1.v5.5;pacid=30776651	-814
chromosome_3	3035861	3035862	75	-	chromosome_3	five_prime_UTR	3036676	3036773	+	ID=Cre03.g164150.t1.1.v5.5.five_prime_UTR.1;Parent=Cre03.g164150.t1.1.v5.5;pacid=30787796	-814
chromosome_14	4153963	4153964	13	-	chromosome_14	five_prime_UTR	4154776	4155163	+	ID=Cre14.g634365.t1.1.v5.5.five_prime_UTR.1;Parent=Cre14.g634365.t1.1.v5.5;pacid=30776651	-812
chromosome_14	4153964	4153965	27	-	chromosome_14	five_prime_UTR	4154776	4155163	+	ID=Cre14.g634365.t1.1.v5.5.five_prime_UTR.1;Parent=Cre14.g634365.t1.1.v5.5;pacid=30776651	-811
chromosome_14	4153965	4153966	366	-	chromosome_14	five_prime_UTR	4154776	4155163	+	ID=Cre14.g634365.t1.1.v5.5.five_prime_UTR.1;Parent=Cre14.g634365.t1.1.v5.5;pacid=30776651	-810
chromosome_14	4153966	4153967	101	-	chromosome_14	five_prime_UTR	4154776	4155163	+	ID=Cre14.g634365.t1.1.v5.5.five_prime_UTR.1;Parent=Cre14.g634365.t1.1.v5.5;pacid=30776651	-809
chromosome_14	4153967	4153968	1468	-	chromosome_14	five_prime_UTR	4154776	4155163	+	ID=Cre14.g634365.t1.1.v5.5.five_prime_UTR.1;Parent=Cre14.g634365.t1.1.v5.5;pacid=30776651	-808
chromosome_14	4153970	4153971	71	-	chromosome_14	five_prime_UTR	4154776	4155163	+	ID=Cre14.g634365.t1.1.v5.5.five_prime_UTR.1;Parent=Cre14.g634365.t1.1.v5.5;pacid=30776651	-805
chromosome_14	4153971	4153972	164	-	chromosome_14	five_prime_UTR	4154776	4155163	+	ID=Cre14.g634365.t1.1.v5.5.five_prime_UTR.1;Parent=Cre14.g634365.t1.1.v5.5;pacid=30776651	-804
chromosome_9	3941216	3941217	13	-	chromosome_9	five_prime_UTR	3942021	3942738	+	ID=Cre09.g392430.t1.1.v5.5.five_prime_UTR.1;Parent=Cre09.g392430.t1.1.v5.5;pacid=30781305	-804
chromosome_14	4153972	4153973	754	-	chromosome_14	five_prime_UTR	4154776	4155163	+	ID=Cre14.g634365.t1.1.v5.5.five_prime_UTR.1;Parent=Cre14.g634365.t1.1.v5.5;pacid=30776651	-803
chromosome_9	3941218	3941219	16	-	chromosome_9	five_prime_UTR	3942021	3942738	+	ID=Cre09.g392430.t1.1.v5.5.five_prime_UTR.1;Parent=Cre09.g392430.t1.1.v5.5;pacid=30781305	-802
chromosome_14	4153974	4153975	27	-	chromosome_14	five_prime_UTR	4154776	4155163	+	ID=Cre14.g634365.t1.1.v5.5.five_prime_UTR.1;Parent=Cre14.g634365.t1.1.v5.5;pacid=30776651	-801
chromosome_9	3941220	3941221	14	-	chromosome_9	five_prime_UTR	3942021	3942738	+	ID=Cre09.g392430.t1.1.v5.5.five_prime_UTR.1;Parent=Cre09.g392430.t1.1.v5.5;pacid=30781305	-800
chromosome_8	60429	60430	10	+	chromosome_8	five_prime_UTR	58917	59635	-	ID=Cre08.g358521.t1.1.v5.5.five_prime_UTR.1;Parent=Cre08.g358521.t1.1.v5.5;pacid=30773953	-795
chromosome_14	4153981	4153982	16	-	chromosome_14	five_prime_UTR	4154776	4155163	+	ID=Cre14.g634365.t1.1.v5.5.five_prime_UTR.1;Parent=Cre14.g634365.t1.1.v5.5;pacid=30776651	-794
chromosome_14	4153986	4153987	12	-	chromosome_14	five_prime_UTR	4154776	4155163	+	ID=Cre14.g634365.t1.1.v5.5.five_prime_UTR.1;Parent=Cre14.g634365.t1.1.v5.5;pacid=30776651	-789
chromosome_14	4153993	4153994	15	-	chromosome_14	five_prime_UTR	4154776	4155163	+	ID=Cre14.g634365.t1.1.v5.5.five_prime_UTR.1;Parent=Cre14.g634365.t1.1.v5.5;pacid=30776651	-782
chromosome_14	187513	187514	37	+	chromosome_14	five_prime_UTR	186276	186733	-	ID=Cre14.g608950.t1.2.v5.5.five_prime_UTR.1;Parent=Cre14.g608950.t1.2.v5.5;pacid=30776236	-781
chromosome_14	4153997	4153998	28	-	chromosome_14	five_prime_UTR	4154776	4155163	+	ID=Cre14.g634365.t1.1.v5.5.five_prime_UTR.1;Parent=Cre14.g634365.t1.1.v5.5;pacid=30776651	-778
chromosome_14	4153998	4153999	10	-	chromosome_14	five_prime_UTR	4154776	4155163	+	ID=Cre14.g634365.t1.1.v5.5.five_prime_UTR.1;Parent=Cre14.g634365.t1.1.v5.5;pacid=30776651	-777
chromosome_12	7063903	7063904	16	-	chromosome_12	five_prime_UTR	7064679	7064796	+	ID=Cre12.g559550.t1.2.v5.5.five_prime_UTR.1;Parent=Cre12.g559550.t1.2.v5.5;pacid=30792772	-775
chromosome_14	4154000	4154001	26	-	chromosome_14	five_prime_UTR	4154776	4155163	+	ID=Cre14.g634365.t1.1.v5.5.five_prime_UTR.1;Parent=Cre14.g634365.t1.1.v5.5;pacid=30776651	-775
chromosome_14	4154010	4154011	22	-	chromosome_14	five_prime_UTR	4154776	4155163	+	ID=Cre14.g634365.t1.1.v5.5.five_prime_UTR.1;Parent=Cre14.g634365.t1.1.v5.5;pacid=30776651	-765
chromosome_14	4154011	4154012	400	-	chromosome_14	five_prime_UTR	4154776	4155163	+	ID=Cre14.g634365.t1.1.v5.5.five_prime_UTR.1;Parent=Cre14.g634365.t1.1.v5.5;pacid=30776651	-764
chromosome_14	4154012	4154013	48	-	chromosome_14	five_prime_UTR	4154776	4155163	+	ID=Cre14.g634365.t1.1.v5.5.five_prime_UTR.1;Parent=Cre14.g634365.t1.1.v5.5;pacid=30776651	-763
chromosome_14	4154013	4154014	40	-	chromosome_14	five_prime_UTR	4154776	4155163	+	ID=Cre14.g634365.t1.1.v5.5.five_prime_UTR.1;Parent=Cre14.g634365.t1.1.v5.5;pacid=30776651	-762
chromosome_9	1806684	1806685	18	+	chromosome_9	five_prime_UTR	1805752	1805928	-	ID=Cre09.g396150.t1.1.v5.5.five_prime_UTR.1;Parent=Cre09.g396150.t1.1.v5.5;pacid=30780832	-757
chromosome_9	1806683	1806684	37	+	chromosome_9	five_prime_UTR	1805752	1805928	-	ID=Cre09.g396150.t1.1.v5.5.five_prime_UTR.1;Parent=Cre09.g396150.t1.1.v5.5;pacid=30780832	-756
chromosome_9	1806682	1806683	38	+	chromosome_9	five_prime_UTR	1805752	1805928	-	ID=Cre09.g396150.t1.1.v5.5.five_prime_UTR.1;Parent=Cre09.g396150.t1.1.v5.5;pacid=30780832	-755
chromosome_14	4154030	4154031	25	-	chromosome_14	five_prime_UTR	4154776	4155163	+	ID=Cre14.g634365.t1.1.v5.5.five_prime_UTR.1;Parent=Cre14.g634365.t1.1.v5.5;pacid=30776651	-745
chromosome_14	4154031	4154032	240	-	chromosome_14	five_prime_UTR	4154776	4155163	+	ID=Cre14.g634365.t1.1.v5.5.five_prime_UTR.1;Parent=Cre14.g634365.t1.1.v5.5;pacid=30776651	-744
chromosome_14	4154032	4154033	2927	-	chromosome_14	five_prime_UTR	4154776	4155163	+	ID=Cre14.g634365.t1.1.v5.5.five_prime_UTR.1;Parent=Cre14.g634365.t1.1.v5.5;pacid=30776651	-743
chromosome_7	2613013	2613014	10	-	chromosome_7	five_prime_UTR	2613753	2613993	+	ID=Cre07.g330250.t1.2.v5.5.five_prime_UTR.1;Parent=Cre07.g330250.t1.2.v5.5;pacid=30775443	-739
chromosome_17	1970795	1970796	12	+	chromosome_17	five_prime_UTR	1969376	1970065	-	ID=Cre17.g710900.t1.2.v5.5.five_prime_UTR.1;Parent=Cre17.g710900.t1.2.v5.5;pacid=30781879	-731
chromosome_12	5402447	5402448	12	-	chromosome_12	five_prime_UTR	5403178	5403208	+	ID=Cre12.g529950.t1.2.v5.5.five_prime_UTR.1;Parent=Cre12.g529950.t1.2.v5.5;pacid=30792112	-730
chromosome_14	4154045	4154046	15	-	chromosome_14	five_prime_UTR	4154776	4155163	+	ID=Cre14.g634365.t1.1.v5.5.five_prime_UTR.1;Parent=Cre14.g634365.t1.1.v5.5;pacid=30776651	-730
chromosome_14	4154046	4154047	40	-	chromosome_14	five_prime_UTR	4154776	4155163	+	ID=Cre14.g634365.t1.1.v5.5.five_prime_UTR.1;Parent=Cre14.g634365.t1.1.v5.5;pacid=30776651	-729
chromosome_14	4154047	4154048	1338	-	chromosome_14	five_prime_UTR	4154776	4155163	+	ID=Cre14.g634365.t1.1.v5.5.five_prime_UTR.1;Parent=Cre14.g634365.t1.1.v5.5;pacid=30776651	-728
chromosome_14	4154049	4154050	18	-	chromosome_14	five_prime_UTR	4154776	4155163	+	ID=Cre14.g634365.t1.1.v5.5.five_prime_UTR.1;Parent=Cre14.g634365.t1.1.v5.5;pacid=30776651	-726
chromosome_1	1340748	1340749	32	+	chromosome_1	five_prime_UTR	1339770	1340025	-	ID=Cre01.g006733.t1.1.v5.5.five_prime_UTR.1;Parent=Cre01.g006733.t1.1.v5.5;pacid=30788415	-724
chromosome_1	1340747	1340748	83	+	chromosome_1	five_prime_UTR	1339770	1340025	-	ID=Cre01.g006733.t1.1.v5.5.five_prime_UTR.1;Parent=Cre01.g006733.t1.1.v5.5;pacid=30788415	-723
chromosome_1	6961629	6961630	22	+	chromosome_1	five_prime_UTR	6960744	6960907	-	ID=Cre01.g050200.t1.2.v5.5.five_prime_UTR.1;Parent=Cre01.g050200.t1.2.v5.5;pacid=30788362	-723
chromosome_1	1340746	1340747	135	+	chromosome_1	five_prime_UTR	1339770	1340025	-	ID=Cre01.g006733.t1.1.v5.5.five_prime_UTR.1;Parent=Cre01.g006733.t1.1.v5.5;pacid=30788415	-722
chromosome_1	6961628	6961629	57	+	chromosome_1	five_prime_UTR	6960744	6960907	-	ID=Cre01.g050200.t1.2.v5.5.five_prime_UTR.1;Parent=Cre01.g050200.t1.2.v5.5;pacid=30788362	-722
chromosome_1	1340745	1340746	124	+	chromosome_1	five_prime_UTR	1339770	1340025	-	ID=Cre01.g006733.t1.1.v5.5.five_prime_UTR.1;Parent=Cre01.g006733.t1.1.v5.5;pacid=30788415	-721
chromosome_14	4154054	4154055	30	-	chromosome_14	five_prime_UTR	4154776	4155163	+	ID=Cre14.g634365.t1.1.v5.5.five_prime_UTR.1;Parent=Cre14.g634365.t1.1.v5.5;pacid=30776651	-721
chromosome_1	1340744	1340745	282	+	chromosome_1	five_prime_UTR	1339770	1340025	-	ID=Cre01.g006733.t1.1.v5.5.five_prime_UTR.1;Parent=Cre01.g006733.t1.1.v5.5;pacid=30788415	-720
chromosome_1	6961626	6961627	112	+	chromosome_1	five_prime_UTR	6960744	6960907	-	ID=Cre01.g050200.t1.2.v5.5.five_prime_UTR.1;Parent=Cre01.g050200.t1.2.v5.5;pacid=30788362	-720
chromosome_14	4154055	4154056	36	-	chromosome_14	five_prime_UTR	4154776	4155163	+	ID=Cre14.g634365.t1.1.v5.5.five_prime_UTR.1;Parent=Cre14.g634365.t1.1.v5.5;pacid=30776651	-720
chromosome_11	2171820	2171821	12	+	chromosome_11	five_prime_UTR	2170655	2171102	-	ID=Cre11.g469650.t1.1.v5.5.five_prime_UTR.1;Parent=Cre11.g469650.t1.1.v5.5;pacid=30775902	-719
chromosome_14	4154056	4154057	159	-	chromosome_14	five_prime_UTR	4154776	4155163	+	ID=Cre14.g634365.t1.1.v5.5.five_prime_UTR.1;Parent=Cre14.g634365.t1.1.v5.5;pacid=30776651	-719
chromosome_1	6961624	6961625	29	+	chromosome_1	five_prime_UTR	6960744	6960907	-	ID=Cre01.g050200.t1.2.v5.5.five_prime_UTR.1;Parent=Cre01.g050200.t1.2.v5.5;pacid=30788362	-718
chromosome_14	4154057	4154058	29	-	chromosome_14	five_prime_UTR	4154776	4155163	+	ID=Cre14.g634365.t1.1.v5.5.five_prime_UTR.1;Parent=Cre14.g634365.t1.1.v5.5;pacid=30776651	-718
chromosome_11	2171818	2171819	25	+	chromosome_11	five_prime_UTR	2170655	2171102	-	ID=Cre11.g469650.t1.1.v5.5.five_prime_UTR.1;Parent=Cre11.g469650.t1.1.v5.5;pacid=30775902	-717
chromosome_14	4154058	4154059	13	-	chromosome_14	five_prime_UTR	4154776	4155163	+	ID=Cre14.g634365.t1.1.v5.5.five_prime_UTR.1;Parent=Cre14.g634365.t1.1.v5.5;pacid=30776651	-717
chromosome_14	4154062	4154063	39	-	chromosome_14	five_prime_UTR	4154776	4155163	+	ID=Cre14.g634365.t1.1.v5.5.five_prime_UTR.1;Parent=Cre14.g634365.t1.1.v5.5;pacid=30776651	-713
chromosome_14	4154063	4154064	107	-	chromosome_14	five_prime_UTR	4154776	4155163	+	ID=Cre14.g634365.t1.1.v5.5.five_prime_UTR.1;Parent=Cre14.g634365.t1.1.v5.5;pacid=30776651	-712
chromosome_16	1214238	1214239	53	+	chromosome_16	five_prime_UTR	1213324	1213537	-	ID=Cre16.g650850.t1.2.v5.5.five_prime_UTR.1;Parent=Cre16.g650850.t1.2.v5.5;pacid=30777924	-702
chromosome_10	3823480	3823481	12	-	chromosome_10	five_prime_UTR	3824143	3824319	+	ID=Cre10.g447200.t1.1.v5.5.five_prime_UTR.1;Parent=Cre10.g447200.t1.1.v5.5;pacid=30790643	-662
chromosome_9	7166075	7166076	11	+	chromosome_9	five_prime_UTR	7165259	7165425	-	ID=Cre09.g412100.t1.2.v5.5.five_prime_UTR.1;Parent=Cre09.g412100.t1.2.v5.5;pacid=30780717	-651
chromosome_2	8822326	8822327	12	+	chromosome_2	five_prime_UTR	8821374	8821678	-	ID=Cre02.g142506.t1.1.v5.5.five_prime_UTR.1;Parent=Cre02.g142506.t1.1.v5.5;pacid=30785605	-649
chromosome_9	7166073	7166074	31	+	chromosome_9	five_prime_UTR	7165259	7165425	-	ID=Cre09.g412100.t1.2.v5.5.five_prime_UTR.1;Parent=Cre09.g412100.t1.2.v5.5;pacid=30780717	-649
chromosome_2	8822325	8822326	12	+	chromosome_2	five_prime_UTR	8821374	8821678	-	ID=Cre02.g142506.t1.1.v5.5.five_prime_UTR.1;Parent=Cre02.g142506.t1.1.v5.5;pacid=30785605	-648
chromosome_2	8822324	8822325	16	+	chromosome_2	five_prime_UTR	8821374	8821678	-	ID=Cre02.g142506.t1.1.v5.5.five_prime_UTR.1;Parent=Cre02.g142506.t1.1.v5.5;pacid=30785605	-647
chromosome_2	8822323	8822324	32	+	chromosome_2	five_prime_UTR	8821374	8821678	-	ID=Cre02.g142506.t1.1.v5.5.five_prime_UTR.1;Parent=Cre02.g142506.t1.1.v5.5;pacid=30785605	-646
chromosome_2	8822322	8822323	12	+	chromosome_2	five_prime_UTR	8821374	8821678	-	ID=Cre02.g142506.t1.1.v5.5.five_prime_UTR.1;Parent=Cre02.g142506.t1.1.v5.5;pacid=30785605	-645
chromosome_12	6831160	6831161	15	-	chromosome_12	five_prime_UTR	6831804	6832068	+	ID=Cre12.g561200.t1.1.v5.5.five_prime_UTR.1;Parent=Cre12.g561200.t1.1.v5.5;pacid=30793124	-643
chromosome_2	8822320	8822321	16	+	chromosome_2	five_prime_UTR	8821374	8821678	-	ID=Cre02.g142506.t1.1.v5.5.five_prime_UTR.1;Parent=Cre02.g142506.t1.1.v5.5;pacid=30785605	-643
chromosome_17	7042433	7042434	12	-	chromosome_17	five_prime_UTR	7043066	7043165	+	ID=Cre17.g746747.t1.1.v5.5.five_prime_UTR.1;Parent=Cre17.g746747.t1.1.v5.5;pacid=30781690	-632
chromosome_14	4154155	4154156	16	-	chromosome_14	five_prime_UTR	4154776	4155163	+	ID=Cre14.g634365.t1.1.v5.5.five_prime_UTR.1;Parent=Cre14.g634365.t1.1.v5.5;pacid=30776651	-620
chromosome_10	3167126	3167127	28	-	chromosome_10	five_prime_UTR	3167726	3167846	+	ID=Cre10.g442150.t1.1.v5.5.five_prime_UTR.1;Parent=Cre10.g442150.t1.1.v5.5;pacid=30789998	-599
chromosome_13	3131900	3131901	25	-	chromosome_13	five_prime_UTR	3132486	3132800	+	ID=Cre13.g585026.t1.1.v5.5.five_prime_UTR.1;Parent=Cre13.g585026.t1.1.v5.5;pacid=30784040	-585
chromosome_13	3131901	3131902	11	-	chromosome_13	five_prime_UTR	3132486	3132800	+	ID=Cre13.g585026.t1.1.v5.5.five_prime_UTR.1;Parent=Cre13.g585026.t1.1.v5.5;pacid=30784040	-584
chromosome_13	3131902	3131903	12	-	chromosome_13	five_prime_UTR	3132486	3132800	+	ID=Cre13.g585026.t1.1.v5.5.five_prime_UTR.1;Parent=Cre13.g585026.t1.1.v5.5;pacid=30784040	-583
chromosome_16	2132617	2132618	14	-	chromosome_16	five_prime_UTR	2133196	2133278	+	ID=Cre16.g658000.t1.1.v5.5.five_prime_UTR.1;Parent=Cre16.g658000.t1.1.v5.5;pacid=30776993	-578
chromosome_16	2132618	2132619	16	-	chromosome_16	five_prime_UTR	2133196	2133278	+	ID=Cre16.g658000.t1.1.v5.5.five_prime_UTR.1;Parent=Cre16.g658000.t1.1.v5.5;pacid=30776993	-577
chromosome_16	2132621	2132622	52	-	chromosome_16	five_prime_UTR	2133196	2133278	+	ID=Cre16.g658000.t1.1.v5.5.five_prime_UTR.1;Parent=Cre16.g658000.t1.1.v5.5;pacid=30776993	-574
chromosome_16	2132622	2132623	83	-	chromosome_16	five_prime_UTR	2133196	2133278	+	ID=Cre16.g658000.t1.1.v5.5.five_prime_UTR.1;Parent=Cre16.g658000.t1.1.v5.5;pacid=30776993	-573
chromosome_16	2132623	2132624	33	-	chromosome_16	five_prime_UTR	2133196	2133278	+	ID=Cre16.g658000.t1.1.v5.5.five_prime_UTR.1;Parent=Cre16.g658000.t1.1.v5.5;pacid=30776993	-572
chromosome_16	2132624	2132625	51	-	chromosome_16	five_prime_UTR	2133196	2133278	+	ID=Cre16.g658000.t1.1.v5.5.five_prime_UTR.1;Parent=Cre16.g658000.t1.1.v5.5;pacid=30776993	-571
chromosome_scaffold_28	26812	26813	11	+	chromosome_scaffold_28	five_prime_UTR	26201	26245	-	ID=Cre28.g757647.t1.1.v5.5.five_prime_UTR.1;Parent=Cre28.g757647.t1.1.v5.5;pacid=30782927	-568
chromosome_scaffold_28	26811	26812	11	+	chromosome_scaffold_28	five_prime_UTR	26201	26245	-	ID=Cre28.g757647.t1.1.v5.5.five_prime_UTR.1;Parent=Cre28.g757647.t1.1.v5.5;pacid=30782927	-567
chromosome_6	662952	662953	15	-	chromosome_6	five_prime_UTR	663509	663685	+	ID=Cre06.g253902.t1.1.v5.5.five_prime_UTR.1;Parent=Cre06.g253902.t1.1.v5.5;pacid=30779121	-556
chromosome_6	662957	662958	24	-	chromosome_6	five_prime_UTR	663509	663685	+	ID=Cre06.g253902.t1.1.v5.5.five_prime_UTR.1;Parent=Cre06.g253902.t1.1.v5.5;pacid=30779121	-551
chromosome_6	662959	662960	58	-	chromosome_6	five_prime_UTR	663509	663685	+	ID=Cre06.g253902.t1.1.v5.5.five_prime_UTR.1;Parent=Cre06.g253902.t1.1.v5.5;pacid=30779121	-549
chromosome_3	5737917	5737918	24	+	chromosome_3	five_prime_UTR	5737189	5737375	-	ID=Cre03.g188100.t1.2.v5.5.five_prime_UTR.1;Parent=Cre03.g188100.t1.2.v5.5;pacid=30787982	-543
chromosome_3	5737916	5737917	13	+	chromosome_3	five_prime_UTR	5737189	5737375	-	ID=Cre03.g188100.t1.2.v5.5.five_prime_UTR.1;Parent=Cre03.g188100.t1.2.v5.5;pacid=30787982	-542
chromosome_3	5737915	5737916	36	+	chromosome_3	five_prime_UTR	5737189	5737375	-	ID=Cre03.g188100.t1.2.v5.5.five_prime_UTR.1;Parent=Cre03.g188100.t1.2.v5.5;pacid=30787982	-541
chromosome_12	6605946	6605947	10	+	chromosome_12	five_prime_UTR	6604638	6605407	-	ID=Cre12.g539141.t1.1.v5.5.five_prime_UTR.1;Parent=Cre12.g539141.t1.1.v5.5;pacid=30792358	-540
chromosome_3	5737913	5737914	20	+	chromosome_3	five_prime_UTR	5737189	5737375	-	ID=Cre03.g188100.t1.2.v5.5.five_prime_UTR.1;Parent=Cre03.g188100.t1.2.v5.5;pacid=30787982	-539
chromosome_3	5737912	5737913	72	+	chromosome_3	five_prime_UTR	5737189	5737375	-	ID=Cre03.g188100.t1.2.v5.5.five_prime_UTR.1;Parent=Cre03.g188100.t1.2.v5.5;pacid=30787982	-538
chromosome_2	2977780	2977781	30	+	chromosome_2	five_prime_UTR	2977104	2977244	-	ID=Cre02.g095040.t1.1.v5.5.five_prime_UTR.1;Parent=Cre02.g095040.t1.1.v5.5;pacid=30785339	-537
chromosome_12	8809587	8809588	16	-	chromosome_12	five_prime_UTR	8810124	8810334	+	ID=Cre12.g545150.t1.1.v5.5.five_prime_UTR.1;Parent=Cre12.g545150.t1.1.v5.5;pacid=30792094	-536
chromosome_2	2977779	2977780	28	+	chromosome_2	five_prime_UTR	2977104	2977244	-	ID=Cre02.g095040.t1.1.v5.5.five_prime_UTR.1;Parent=Cre02.g095040.t1.1.v5.5;pacid=30785339	-536
chromosome_12	8809588	8809589	220	-	chromosome_12	five_prime_UTR	8810124	8810334	+	ID=Cre12.g545150.t1.1.v5.5.five_prime_UTR.1;Parent=Cre12.g545150.t1.1.v5.5;pacid=30792094	-535
chromosome_2	2977778	2977779	24	+	chromosome_2	five_prime_UTR	2977104	2977244	-	ID=Cre02.g095040.t1.1.v5.5.five_prime_UTR.1;Parent=Cre02.g095040.t1.1.v5.5;pacid=30785339	-535
chromosome_12	8809589	8809590	165	-	chromosome_12	five_prime_UTR	8810124	8810334	+	ID=Cre12.g545150.t1.1.v5.5.five_prime_UTR.1;Parent=Cre12.g545150.t1.1.v5.5;pacid=30792094	-534
chromosome_2	2977777	2977778	63	+	chromosome_2	five_prime_UTR	2977104	2977244	-	ID=Cre02.g095040.t1.1.v5.5.five_prime_UTR.1;Parent=Cre02.g095040.t1.1.v5.5;pacid=30785339	-534
chromosome_12	8809590	8809591	62	-	chromosome_12	five_prime_UTR	8810124	8810334	+	ID=Cre12.g545150.t1.1.v5.5.five_prime_UTR.1;Parent=Cre12.g545150.t1.1.v5.5;pacid=30792094	-533
chromosome_2	2977776	2977777	40	+	chromosome_2	five_prime_UTR	2977104	2977244	-	ID=Cre02.g095040.t1.1.v5.5.five_prime_UTR.1;Parent=Cre02.g095040.t1.1.v5.5;pacid=30785339	-533
chromosome_12	8809591	8809592	476	-	chromosome_12	five_prime_UTR	8810124	8810334	+	ID=Cre12.g545150.t1.1.v5.5.five_prime_UTR.1;Parent=Cre12.g545150.t1.1.v5.5;pacid=30792094	-532
chromosome_2	2977775	2977776	34	+	chromosome_2	five_prime_UTR	2977104	2977244	-	ID=Cre02.g095040.t1.1.v5.5.five_prime_UTR.1;Parent=Cre02.g095040.t1.1.v5.5;pacid=30785339	-532
chromosome_12	8809592	8809593	35	-	chromosome_12	five_prime_UTR	8810124	8810334	+	ID=Cre12.g545150.t1.1.v5.5.five_prime_UTR.1;Parent=Cre12.g545150.t1.1.v5.5;pacid=30792094	-531
chromosome_2	2977774	2977775	141	+	chromosome_2	five_prime_UTR	2977104	2977244	-	ID=Cre02.g095040.t1.1.v5.5.five_prime_UTR.1;Parent=Cre02.g095040.t1.1.v5.5;pacid=30785339	-531
chromosome_12	8809593	8809594	40	-	chromosome_12	five_prime_UTR	8810124	8810334	+	ID=Cre12.g545150.t1.1.v5.5.five_prime_UTR.1;Parent=Cre12.g545150.t1.1.v5.5;pacid=30792094	-530
chromosome_2	2977773	2977774	26	+	chromosome_2	five_prime_UTR	2977104	2977244	-	ID=Cre02.g095040.t1.1.v5.5.five_prime_UTR.1;Parent=Cre02.g095040.t1.1.v5.5;pacid=30785339	-530
chromosome_2	2977772	2977773	18	+	chromosome_2	five_prime_UTR	2977104	2977244	-	ID=Cre02.g095040.t1.1.v5.5.five_prime_UTR.1;Parent=Cre02.g095040.t1.1.v5.5;pacid=30785339	-529
chromosome_2	2977771	2977772	55	+	chromosome_2	five_prime_UTR	2977104	2977244	-	ID=Cre02.g095040.t1.1.v5.5.five_prime_UTR.1;Parent=Cre02.g095040.t1.1.v5.5;pacid=30785339	-528
chromosome_2	2977770	2977771	17	+	chromosome_2	five_prime_UTR	2977104	2977244	-	ID=Cre02.g095040.t1.1.v5.5.five_prime_UTR.1;Parent=Cre02.g095040.t1.1.v5.5;pacid=30785339	-527
chromosome_2	6430880	6430881	15	-	chromosome_2	five_prime_UTR	6431408	6431454	+	ID=Cre02.g115750.t1.1.v5.5.five_prime_UTR.1;Parent=Cre02.g115750.t1.1.v5.5;pacid=30786393	-527
chromosome_2	2977769	2977770	12	+	chromosome_2	five_prime_UTR	2977104	2977244	-	ID=Cre02.g095040.t1.1.v5.5.five_prime_UTR.1;Parent=Cre02.g095040.t1.1.v5.5;pacid=30785339	-526
chromosome_16	2132680	2132681	79	-	chromosome_16	five_prime_UTR	2133196	2133278	+	ID=Cre16.g658000.t1.1.v5.5.five_prime_UTR.1;Parent=Cre16.g658000.t1.1.v5.5;pacid=30776993	-515
chromosome_16	2132681	2132682	123	-	chromosome_16	five_prime_UTR	2133196	2133278	+	ID=Cre16.g658000.t1.1.v5.5.five_prime_UTR.1;Parent=Cre16.g658000.t1.1.v5.5;pacid=30776993	-514
chromosome_16	2132682	2132683	189	-	chromosome_16	five_prime_UTR	2133196	2133278	+	ID=Cre16.g658000.t1.1.v5.5.five_prime_UTR.1;Parent=Cre16.g658000.t1.1.v5.5;pacid=30776993	-513
chromosome_12	6831291	6831292	26	-	chromosome_12	five_prime_UTR	6831804	6832068	+	ID=Cre12.g561200.t1.1.v5.5.five_prime_UTR.1;Parent=Cre12.g561200.t1.1.v5.5;pacid=30793124	-512
chromosome_16	2132683	2132684	37	-	chromosome_16	five_prime_UTR	2133196	2133278	+	ID=Cre16.g658000.t1.1.v5.5.five_prime_UTR.1;Parent=Cre16.g658000.t1.1.v5.5;pacid=30776993	-512
chromosome_16	2132684	2132685	59	-	chromosome_16	five_prime_UTR	2133196	2133278	+	ID=Cre16.g658000.t1.1.v5.5.five_prime_UTR.1;Parent=Cre16.g658000.t1.1.v5.5;pacid=30776993	-511
chromosome_16	2132685	2132686	23	-	chromosome_16	five_prime_UTR	2133196	2133278	+	ID=Cre16.g658000.t1.1.v5.5.five_prime_UTR.1;Parent=Cre16.g658000.t1.1.v5.5;pacid=30776993	-510
chromosome_16	2132686	2132687	14	-	chromosome_16	five_prime_UTR	2133196	2133278	+	ID=Cre16.g658000.t1.1.v5.5.five_prime_UTR.1;Parent=Cre16.g658000.t1.1.v5.5;pacid=30776993	-509
chromosome_2	4360621	4360622	33	+	chromosome_2	five_prime_UTR	4359878	4360116	-	ID=Cre02.g099400.t1.1.v5.5.five_prime_UTR.1;Parent=Cre02.g099400.t1.1.v5.5;pacid=30784873	-506
chromosome_9	4092885	4092886	84	+	chromosome_9	five_prime_UTR	4092247	4092385	-	ID=Cre09.g393543.t1.1.v5.5.five_prime_UTR.1;Parent=Cre09.g393543.t1.1.v5.5;pacid=30781243	-501
chromosome_8	145371	145372	26	-	chromosome_8	five_prime_UTR	145865	145944	+	ID=Cre08.g358540.t1.1.v5.5.five_prime_UTR.1;Parent=Cre08.g358540.t1.1.v5.5;pacid=30773410	-493
chromosome_8	145373	145374	17	-	chromosome_8	five_prime_UTR	145865	145944	+	ID=Cre08.g358540.t1.1.v5.5.five_prime_UTR.1;Parent=Cre08.g358540.t1.1.v5.5;pacid=30773410	-491
chromosome_8	145376	145377	35	-	chromosome_8	five_prime_UTR	145865	145944	+	ID=Cre08.g358540.t1.1.v5.5.five_prime_UTR.1;Parent=Cre08.g358540.t1.1.v5.5;pacid=30773410	-488
chromosome_2	4017668	4017669	26	-	chromosome_2	five_prime_UTR	4018156	4018509	+	ID=Cre02.g097100.t1.2.v5.5.five_prime_UTR.1;Parent=Cre02.g097100.t1.2.v5.5;pacid=30785598	-487
chromosome_14	3186162	3186163	29	-	chromosome_14	five_prime_UTR	3186636	3186731	+	ID=Cre14.g629102.t1.1.v5.5.five_prime_UTR.1;Parent=Cre14.g629102.t1.1.v5.5;pacid=30776232	-473
chromosome_16	2132728	2132729	11	-	chromosome_16	five_prime_UTR	2133196	2133278	+	ID=Cre16.g658000.t1.1.v5.5.five_prime_UTR.1;Parent=Cre16.g658000.t1.1.v5.5;pacid=30776993	-467
chromosome_16	3002184	3002185	31	-	chromosome_16	five_prime_UTR	3002648	3002860	+	ID=Cre16.g664650.t1.2.v5.5.five_prime_UTR.1;Parent=Cre16.g664650.t1.2.v5.5;pacid=30776976	-463
chromosome_12	6831341	6831342	10	-	chromosome_12	five_prime_UTR	6831804	6832068	+	ID=Cre12.g561200.t1.1.v5.5.five_prime_UTR.1;Parent=Cre12.g561200.t1.1.v5.5;pacid=30793124	-462
chromosome_16	3002185	3002186	69	-	chromosome_16	five_prime_UTR	3002648	3002860	+	ID=Cre16.g664650.t1.2.v5.5.five_prime_UTR.1;Parent=Cre16.g664650.t1.2.v5.5;pacid=30776976	-462
chromosome_3	443518	443519	90	-	chromosome_3	five_prime_UTR	443972	444127	+	ID=Cre03.g145007.t1.1.v5.5.five_prime_UTR.1;Parent=Cre03.g145007.t1.1.v5.5;pacid=30787703	-453
chromosome_14	3880523	3880524	14	-	chromosome_14	five_prime_UTR	3880964	3881351	+	ID=Cre14.g632823.t1.1.v5.5.five_prime_UTR.1;Parent=Cre14.g632823.t1.1.v5.5;pacid=30776286	-440
chromosome_7	2517649	2517650	14	+	chromosome_7	five_prime_UTR	2517019	2517213	-	ID=Cre07.g329600.t1.1.v5.5.five_prime_UTR.1;Parent=Cre07.g329600.t1.1.v5.5;pacid=30775176	-437
chromosome_7	2517648	2517649	237	+	chromosome_7	five_prime_UTR	2517019	2517213	-	ID=Cre07.g329600.t1.1.v5.5.five_prime_UTR.1;Parent=Cre07.g329600.t1.1.v5.5;pacid=30775176	-436
chromosome_7	2517647	2517648	157	+	chromosome_7	five_prime_UTR	2517019	2517213	-	ID=Cre07.g329600.t1.1.v5.5.five_prime_UTR.1;Parent=Cre07.g329600.t1.1.v5.5;pacid=30775176	-435
chromosome_7	2517646	2517647	666	+	chromosome_7	five_prime_UTR	2517019	2517213	-	ID=Cre07.g329600.t1.1.v5.5.five_prime_UTR.1;Parent=Cre07.g329600.t1.1.v5.5;pacid=30775176	-434
chromosome_7	2517645	2517646	49	+	chromosome_7	five_prime_UTR	2517019	2517213	-	ID=Cre07.g329600.t1.1.v5.5.five_prime_UTR.1;Parent=Cre07.g329600.t1.1.v5.5;pacid=30775176	-433
chromosome_7	2517644	2517645	31	+	chromosome_7	five_prime_UTR	2517019	2517213	-	ID=Cre07.g329600.t1.1.v5.5.five_prime_UTR.1;Parent=Cre07.g329600.t1.1.v5.5;pacid=30775176	-432
chromosome_7	2517643	2517644	26	+	chromosome_7	five_prime_UTR	2517019	2517213	-	ID=Cre07.g329600.t1.1.v5.5.five_prime_UTR.1;Parent=Cre07.g329600.t1.1.v5.5;pacid=30775176	-431
chromosome_7	2517642	2517643	54	+	chromosome_7	five_prime_UTR	2517019	2517213	-	ID=Cre07.g329600.t1.1.v5.5.five_prime_UTR.1;Parent=Cre07.g329600.t1.1.v5.5;pacid=30775176	-430
chromosome_14	4154353	4154354	25	-	chromosome_14	five_prime_UTR	4154776	4155163	+	ID=Cre14.g634365.t1.1.v5.5.five_prime_UTR.1;Parent=Cre14.g634365.t1.1.v5.5;pacid=30776651	-422
chromosome_13	4774022	4774023	13	-	chromosome_13	five_prime_UTR	4774432	4774496	+	ID=Cre13.g605050.t1.1.v5.5.five_prime_UTR.1;Parent=Cre13.g605050.t1.1.v5.5;pacid=30784478	-409
chromosome_13	4774023	4774024	16	-	chromosome_13	five_prime_UTR	4774432	4774496	+	ID=Cre13.g605050.t1.1.v5.5.five_prime_UTR.1;Parent=Cre13.g605050.t1.1.v5.5;pacid=30784478	-408
chromosome_12	8597863	8597864	19	+	chromosome_12	five_prime_UTR	8597372	8597457	-	ID=Cre12.g547250.t1.2.v5.5.five_prime_UTR.1;Parent=Cre12.g547250.t1.2.v5.5;pacid=30792384	-407
chromosome_14	4154372	4154373	47	-	chromosome_14	five_prime_UTR	4154776	4155163	+	ID=Cre14.g634365.t1.1.v5.5.five_prime_UTR.1;Parent=Cre14.g634365.t1.1.v5.5;pacid=30776651	-403
chromosome_14	4154375	4154376	10	-	chromosome_14	five_prime_UTR	4154776	4155163	+	ID=Cre14.g634365.t1.1.v5.5.five_prime_UTR.1;Parent=Cre14.g634365.t1.1.v5.5;pacid=30776651	-400
chromosome_1	978597	978598	10	-	chromosome_1	five_prime_UTR	978997	979202	+	ID=Cre01.g005500.t1.2.v5.5.five_prime_UTR.1;Parent=Cre01.g005500.t1.2.v5.5;pacid=30789372	-399
chromosome_16	771024	771025	15	-	chromosome_16	five_prime_UTR	771424	771721	+	ID=Cre16.g690902.t1.1.v5.5.five_prime_UTR.1;Parent=Cre16.g690902.t1.1.v5.5;pacid=30776996	-399
chromosome_2	8803221	8803222	10	+	chromosome_2	five_prime_UTR	8802490	8802828	-	ID=Cre02.g142466.t1.1.v5.5.five_prime_UTR.1;Parent=Cre02.g142466.t1.1.v5.5;pacid=30785200	-394
chromosome_14	4154384	4154385	66	-	chromosome_14	five_prime_UTR	4154776	4155163	+	ID=Cre14.g634365.t1.1.v5.5.five_prime_UTR.1;Parent=Cre14.g634365.t1.1.v5.5;pacid=30776651	-391
chromosome_13	2490433	2490434	11	-	chromosome_13	five_prime_UTR	2490822	2491094	+	ID=Cre13.g580150.t1.1.v5.5.five_prime_UTR.1;Parent=Cre13.g580150.t1.1.v5.5;pacid=30783966	-388
chromosome_17	3654184	3654185	12	+	chromosome_17	five_prime_UTR	3653159	3653800	-	ID=Cre17.g726550.t1.1.v5.5.five_prime_UTR.1;Parent=Cre17.g726550.t1.1.v5.5;pacid=30782831	-385
chromosome_17	3654182	3654183	26	+	chromosome_17	five_prime_UTR	3653159	3653800	-	ID=Cre17.g726550.t1.1.v5.5.five_prime_UTR.1;Parent=Cre17.g726550.t1.1.v5.5;pacid=30782831	-383
chromosome_17	3654181	3654182	21	+	chromosome_17	five_prime_UTR	3653159	3653800	-	ID=Cre17.g726550.t1.1.v5.5.five_prime_UTR.1;Parent=Cre17.g726550.t1.1.v5.5;pacid=30782831	-382
chromosome_4	2406277	2406278	21	+	chromosome_4	five_prime_UTR	2405731	2405896	-	ID=Cre04.g221200.t1.1.v5.5.five_prime_UTR.1;Parent=Cre04.g221200.t1.1.v5.5;pacid=30791572	-382
chromosome_4	2406275	2406276	17	+	chromosome_4	five_prime_UTR	2405731	2405896	-	ID=Cre04.g221200.t1.1.v5.5.five_prime_UTR.1;Parent=Cre04.g221200.t1.1.v5.5;pacid=30791572	-380
chromosome_4	2406273	2406274	34	+	chromosome_4	five_prime_UTR	2405731	2405896	-	ID=Cre04.g221200.t1.1.v5.5.five_prime_UTR.1;Parent=Cre04.g221200.t1.1.v5.5;pacid=30791572	-378
chromosome_10	6408786	6408787	34	+	chromosome_10	five_prime_UTR	6408048	6408412	-	ID=Cre10.g465763.t1.1.v5.5.five_prime_UTR.1;Parent=Cre10.g465763.t1.1.v5.5;pacid=30790506	-375
chromosome_10	6408784	6408785	14	+	chromosome_10	five_prime_UTR	6408048	6408412	-	ID=Cre10.g465763.t1.1.v5.5.five_prime_UTR.1;Parent=Cre10.g465763.t1.1.v5.5;pacid=30790506	-373
chromosome_14	4154402	4154403	20	-	chromosome_14	five_prime_UTR	4154776	4155163	+	ID=Cre14.g634365.t1.1.v5.5.five_prime_UTR.1;Parent=Cre14.g634365.t1.1.v5.5;pacid=30776651	-373
chromosome_14	4154404	4154405	40	-	chromosome_14	five_prime_UTR	4154776	4155163	+	ID=Cre14.g634365.t1.1.v5.5.five_prime_UTR.1;Parent=Cre14.g634365.t1.1.v5.5;pacid=30776651	-371
chromosome_14	4154405	4154406	74	-	chromosome_14	five_prime_UTR	4154776	4155163	+	ID=Cre14.g634365.t1.1.v5.5.five_prime_UTR.1;Parent=Cre14.g634365.t1.1.v5.5;pacid=30776651	-370
chromosome_6	3051463	3051464	13	-	chromosome_6	five_prime_UTR	3051816	3051852	+	ID=Cre06.g274450.t1.1.v5.5.five_prime_UTR.1;Parent=Cre06.g274450.t1.1.v5.5;pacid=30778623	-352
chromosome_9	2598379	2598380	24	+	chromosome_9	five_prime_UTR	2597877	2598029	-	ID=Cre09.g390450.t1.2.v5.5.five_prime_UTR.1;Parent=Cre09.g390450.t1.2.v5.5;pacid=30780476	-351
chromosome_9	2598377	2598378	76	+	chromosome_9	five_prime_UTR	2597877	2598029	-	ID=Cre09.g390450.t1.2.v5.5.five_prime_UTR.1;Parent=Cre09.g390450.t1.2.v5.5;pacid=30780476	-349
chromosome_9	2598376	2598377	30	+	chromosome_9	five_prime_UTR	2597877	2598029	-	ID=Cre09.g390450.t1.2.v5.5.five_prime_UTR.1;Parent=Cre09.g390450.t1.2.v5.5;pacid=30780476	-348
chromosome_9	2598374	2598375	25	+	chromosome_9	five_prime_UTR	2597877	2598029	-	ID=Cre09.g390450.t1.2.v5.5.five_prime_UTR.1;Parent=Cre09.g390450.t1.2.v5.5;pacid=30780476	-346
chromosome_11	3054612	3054613	22	-	chromosome_11	five_prime_UTR	3054946	3054972	+	ID=Cre11.g478950.t1.2.v5.5.five_prime_UTR.1;Parent=Cre11.g478950.t1.2.v5.5;pacid=30775827	-333
chromosome_11	3054614	3054615	60	-	chromosome_11	five_prime_UTR	3054946	3054972	+	ID=Cre11.g478950.t1.2.v5.5.five_prime_UTR.1;Parent=Cre11.g478950.t1.2.v5.5;pacid=30775827	-331
chromosome_13	269827	269828	17	-	chromosome_13	five_prime_UTR	270159	270432	+	ID=Cre13.g563876.t1.1.v5.5.five_prime_UTR.1;Parent=Cre13.g563876.t1.1.v5.5;pacid=30783968	-331
chromosome_11	3054617	3054618	30	-	chromosome_11	five_prime_UTR	3054946	3054972	+	ID=Cre11.g478950.t1.2.v5.5.five_prime_UTR.1;Parent=Cre11.g478950.t1.2.v5.5;pacid=30775827	-328
chromosome_11	3054620	3054621	14	-	chromosome_11	five_prime_UTR	3054946	3054972	+	ID=Cre11.g478950.t1.2.v5.5.five_prime_UTR.1;Parent=Cre11.g478950.t1.2.v5.5;pacid=30775827	-325
chromosome_11	3054629	3054630	18	-	chromosome_11	five_prime_UTR	3054946	3054972	+	ID=Cre11.g478950.t1.2.v5.5.five_prime_UTR.1;Parent=Cre11.g478950.t1.2.v5.5;pacid=30775827	-316
chromosome_14	4154471	4154472	13	-	chromosome_14	five_prime_UTR	4154776	4155163	+	ID=Cre14.g634365.t1.1.v5.5.five_prime_UTR.1;Parent=Cre14.g634365.t1.1.v5.5;pacid=30776651	-304
chromosome_14	4154472	4154473	18	-	chromosome_14	five_prime_UTR	4154776	4155163	+	ID=Cre14.g634365.t1.1.v5.5.five_prime_UTR.1;Parent=Cre14.g634365.t1.1.v5.5;pacid=30776651	-303
chromosome_8	5023928	5023929	81	+	chromosome_8	five_prime_UTR	5023382	5023635	-	ID=Cre08.g386100.t1.1.v5.5.five_prime_UTR.1;Parent=Cre08.g386100.t1.1.v5.5;pacid=30773973	-294
chromosome_14	3639919	3639920	10	-	chromosome_14	five_prime_UTR	3640179	3640370	+	ID=Cre14.g631350.t1.1.v5.5.five_prime_UTR.1;Parent=Cre14.g631350.t1.1.v5.5;pacid=30776615	-259
chromosome_14	3639921	3639922	27	-	chromosome_14	five_prime_UTR	3640179	3640370	+	ID=Cre14.g631350.t1.1.v5.5.five_prime_UTR.1;Parent=Cre14.g631350.t1.1.v5.5;pacid=30776615	-257
chromosome_11	2438667	2438668	47	+	chromosome_11	five_prime_UTR	2438179	2438412	-	ID=Cre11.g475200.t1.1.v5.5.five_prime_UTR.1;Parent=Cre11.g475200.t1.1.v5.5;pacid=30775618	-256
chromosome_14	2839582	2839583	11	-	chromosome_14	five_prime_UTR	2839839	2839873	+	ID=Cre14.g627477.t1.1.v5.5.five_prime_UTR.1;Parent=Cre14.g627477.t1.1.v5.5;pacid=30776321	-256
chromosome_11	2438666	2438667	590	+	chromosome_11	five_prime_UTR	2438179	2438412	-	ID=Cre11.g475200.t1.1.v5.5.five_prime_UTR.1;Parent=Cre11.g475200.t1.1.v5.5;pacid=30775618	-255
chromosome_11	2438664	2438665	108	+	chromosome_11	five_prime_UTR	2438179	2438412	-	ID=Cre11.g475200.t1.1.v5.5.five_prime_UTR.1;Parent=Cre11.g475200.t1.1.v5.5;pacid=30775618	-253
chromosome_14	2839585	2839586	12	-	chromosome_14	five_prime_UTR	2839839	2839873	+	ID=Cre14.g627477.t1.1.v5.5.five_prime_UTR.1;Parent=Cre14.g627477.t1.1.v5.5;pacid=30776321	-253
chromosome_11	2438662	2438663	45	+	chromosome_11	five_prime_UTR	2438179	2438412	-	ID=Cre11.g475200.t1.1.v5.5.five_prime_UTR.1;Parent=Cre11.g475200.t1.1.v5.5;pacid=30775618	-251
chromosome_11	2438659	2438660	46	+	chromosome_11	five_prime_UTR	2438179	2438412	-	ID=Cre11.g475200.t1.1.v5.5.five_prime_UTR.1;Parent=Cre11.g475200.t1.1.v5.5;pacid=30775618	-248
chromosome_11	2438656	2438657	214	+	chromosome_11	five_prime_UTR	2438179	2438412	-	ID=Cre11.g475200.t1.1.v5.5.five_prime_UTR.1;Parent=Cre11.g475200.t1.1.v5.5;pacid=30775618	-245
chromosome_11	2438653	2438654	49	+	chromosome_11	five_prime_UTR	2438179	2438412	-	ID=Cre11.g475200.t1.1.v5.5.five_prime_UTR.1;Parent=Cre11.g475200.t1.1.v5.5;pacid=30775618	-242
chromosome_11	3756976	3756977	17	-	chromosome_11	five_prime_UTR	3757217	3757353	+	ID=Cre11.g483033.t1.1.v5.5.five_prime_UTR.1;Parent=Cre11.g483033.t1.1.v5.5;pacid=30775543	-240
chromosome_11	3756978	3756979	12	-	chromosome_11	five_prime_UTR	3757217	3757353	+	ID=Cre11.g483033.t1.1.v5.5.five_prime_UTR.1;Parent=Cre11.g483033.t1.1.v5.5;pacid=30775543	-238
chromosome_12	6782981	6782982	22	+	chromosome_12	five_prime_UTR	6782701	6782752	-	ID=Cre12.g554116.t1.1.v5.5.five_prime_UTR.1;Parent=Cre12.g554116.t1.1.v5.5;pacid=30793325	-230
chromosome_6	3918545	3918546	41	-	chromosome_6	five_prime_UTR	3918766	3919058	+	ID=Cre06.g278184.t1.1.v5.5.five_prime_UTR.1;Parent=Cre06.g278184.t1.1.v5.5;pacid=30778975	-220
chromosome_6	3918547	3918548	17	-	chromosome_6	five_prime_UTR	3918766	3919058	+	ID=Cre06.g278184.t1.1.v5.5.five_prime_UTR.1;Parent=Cre06.g278184.t1.1.v5.5;pacid=30778975	-218
chromosome_6	3918551	3918552	14	-	chromosome_6	five_prime_UTR	3918766	3919058	+	ID=Cre06.g278184.t1.1.v5.5.five_prime_UTR.1;Parent=Cre06.g278184.t1.1.v5.5;pacid=30778975	-214
chromosome_5	2079996	2079997	18	+	chromosome_5	five_prime_UTR	2079661	2079785	-	ID=Cre05.g234600.t1.1.v5.5.five_prime_UTR.1;Parent=Cre05.g234600.t1.1.v5.5;pacid=30783097	-212
chromosome_5	2079995	2079996	95	+	chromosome_5	five_prime_UTR	2079661	2079785	-	ID=Cre05.g234600.t1.1.v5.5.five_prime_UTR.1;Parent=Cre05.g234600.t1.1.v5.5;pacid=30783097	-211
chromosome_14	4154574	4154575	79	-	chromosome_14	five_prime_UTR	4154776	4155163	+	ID=Cre14.g634365.t1.1.v5.5.five_prime_UTR.1;Parent=Cre14.g634365.t1.1.v5.5;pacid=30776651	-201
chromosome_12	7633551	7633552	29	-	chromosome_12	five_prime_UTR	7633751	7633870	+	ID=Cre12.g554850.t1.2.v5.5.five_prime_UTR.1;Parent=Cre12.g554850.t1.2.v5.5;pacid=30792428	-199
chromosome_14	4154577	4154578	17	-	chromosome_14	five_prime_UTR	4154776	4155163	+	ID=Cre14.g634365.t1.1.v5.5.five_prime_UTR.1;Parent=Cre14.g634365.t1.1.v5.5;pacid=30776651	-198
chromosome_14	4154578	4154579	13	-	chromosome_14	five_prime_UTR	4154776	4155163	+	ID=Cre14.g634365.t1.1.v5.5.five_prime_UTR.1;Parent=Cre14.g634365.t1.1.v5.5;pacid=30776651	-197
chromosome_15	1206883	1206884	43	+	chromosome_15	five_prime_UTR	1206578	1206689	-	ID=Cre15.g641282.t1.1.v5.5.five_prime_UTR.1;Parent=Cre15.g641282.t1.1.v5.5;pacid=30783761	-195
chromosome_15	1206882	1206883	31	+	chromosome_15	five_prime_UTR	1206578	1206689	-	ID=Cre15.g641282.t1.1.v5.5.five_prime_UTR.1;Parent=Cre15.g641282.t1.1.v5.5;pacid=30783761	-194
chromosome_15	1206881	1206882	194	+	chromosome_15	five_prime_UTR	1206578	1206689	-	ID=Cre15.g641282.t1.1.v5.5.five_prime_UTR.1;Parent=Cre15.g641282.t1.1.v5.5;pacid=30783761	-193
chromosome_15	1206878	1206879	18	+	chromosome_15	five_prime_UTR	1206578	1206689	-	ID=Cre15.g641282.t1.1.v5.5.five_prime_UTR.1;Parent=Cre15.g641282.t1.1.v5.5;pacid=30783761	-190
chromosome_12	7633561	7633562	35	-	chromosome_12	five_prime_UTR	7633751	7633870	+	ID=Cre12.g554850.t1.2.v5.5.five_prime_UTR.1;Parent=Cre12.g554850.t1.2.v5.5;pacid=30792428	-189
chromosome_11	3810060	3810061	13	+	chromosome_11	five_prime_UTR	3809538	3809876	-	ID=Cre11.g483450.t1.1.v5.5.five_prime_UTR.1;Parent=Cre11.g483450.t1.1.v5.5;pacid=30775644	-185
chromosome_15	1049076	1049077	10	+	chromosome_15	five_prime_UTR	1048709	1048895	-	ID=Cre15.g638550.t1.1.v5.5.five_prime_UTR.1;Parent=Cre15.g638550.t1.1.v5.5;pacid=30783737	-182
chromosome_16	1592824	1592825	16	+	chromosome_16	five_prime_UTR	1592422	1592665	-	ID=Cre16.g653850.t1.1.v5.5.five_prime_UTR.1;Parent=Cre16.g653850.t1.1.v5.5;pacid=30777593	-160
chromosome_3	3848226	3848227	10	+	chromosome_3	five_prime_UTR	3847994	3848069	-	ID=Cre03.g170750.t1.2.v5.5.five_prime_UTR.1;Parent=Cre03.g170750.t1.2.v5.5;pacid=30786644	-158
chromosome_13	3132328	3132329	18	-	chromosome_13	five_prime_UTR	3132486	3132800	+	ID=Cre13.g585026.t1.1.v5.5.five_prime_UTR.1;Parent=Cre13.g585026.t1.1.v5.5;pacid=30784040	-157
chromosome_14	4154636	4154637	18	-	chromosome_14	five_prime_UTR	4154776	4155163	+	ID=Cre14.g634365.t1.1.v5.5.five_prime_UTR.1;Parent=Cre14.g634365.t1.1.v5.5;pacid=30776651	-139
chromosome_5	2629770	2629771	13	-	chromosome_5	five_prime_UTR	2629910	2630151	+	ID=Cre05.g236375.t1.1.v5.5.five_prime_UTR.1;Parent=Cre05.g236375.t1.1.v5.5;pacid=30783432	-139
chromosome_6	6777989	6777990	13	-	chromosome_6	five_prime_UTR	6778127	6778205	+	ID=Cre06.g294800.t1.1.v5.5.five_prime_UTR.1;Parent=Cre06.g294800.t1.1.v5.5;pacid=30779021	-137
chromosome_6	6777991	6777992	38	-	chromosome_6	five_prime_UTR	6778127	6778205	+	ID=Cre06.g294800.t1.1.v5.5.five_prime_UTR.1;Parent=Cre06.g294800.t1.1.v5.5;pacid=30779021	-135
chromosome_11	82786	82787	35	+	chromosome_11	five_prime_UTR	82372	82655	-	ID=Cre11.g467530.t1.1.v5.5.five_prime_UTR.1;Parent=Cre11.g467530.t1.1.v5.5;pacid=30775718	-132
chromosome_2	2640130	2640131	18	-	chromosome_2	five_prime_UTR	2640258	2640542	+	ID=Cre02.g093202.t1.1.v5.5.five_prime_UTR.1;Parent=Cre02.g093202.t1.1.v5.5;pacid=30784804	-127
chromosome_4	1142530	1142531	15	-	chromosome_4	five_prime_UTR	1142656	1142820	+	ID=Cre04.g215900.t1.1.v5.5.five_prime_UTR.1;Parent=Cre04.g215900.t1.1.v5.5;pacid=30791612	-125
chromosome_11	2438535	2438536	24	+	chromosome_11	five_prime_UTR	2438179	2438412	-	ID=Cre11.g475200.t1.1.v5.5.five_prime_UTR.1;Parent=Cre11.g475200.t1.1.v5.5;pacid=30775618	-124
chromosome_11	2438534	2438535	1379	+	chromosome_11	five_prime_UTR	2438179	2438412	-	ID=Cre11.g475200.t1.1.v5.5.five_prime_UTR.1;Parent=Cre11.g475200.t1.1.v5.5;pacid=30775618	-123
chromosome_7	5310796	5310797	89	+	chromosome_7	five_prime_UTR	5310324	5310674	-	ID=Cre07.g349600.t1.2.v5.5.five_prime_UTR.1;Parent=Cre07.g349600.t1.2.v5.5;pacid=30775243	-123
chromosome_11	2438533	2438534	10	+	chromosome_11	five_prime_UTR	2438179	2438412	-	ID=Cre11.g475200.t1.1.v5.5.five_prime_UTR.1;Parent=Cre11.g475200.t1.1.v5.5;pacid=30775618	-122
chromosome_3	3848190	3848191	12	+	chromosome_3	five_prime_UTR	3847994	3848069	-	ID=Cre03.g170750.t1.2.v5.5.five_prime_UTR.1;Parent=Cre03.g170750.t1.2.v5.5;pacid=30786644	-122
chromosome_11	2438532	2438533	45	+	chromosome_11	five_prime_UTR	2438179	2438412	-	ID=Cre11.g475200.t1.1.v5.5.five_prime_UTR.1;Parent=Cre11.g475200.t1.1.v5.5;pacid=30775618	-121
chromosome_7	5310794	5310795	27	+	chromosome_7	five_prime_UTR	5310324	5310674	-	ID=Cre07.g349600.t1.2.v5.5.five_prime_UTR.1;Parent=Cre07.g349600.t1.2.v5.5;pacid=30775243	-121
chromosome_11	2438531	2438532	145	+	chromosome_11	five_prime_UTR	2438179	2438412	-	ID=Cre11.g475200.t1.1.v5.5.five_prime_UTR.1;Parent=Cre11.g475200.t1.1.v5.5;pacid=30775618	-120
chromosome_7	5310793	5310794	114	+	chromosome_7	five_prime_UTR	5310324	5310674	-	ID=Cre07.g349600.t1.2.v5.5.five_prime_UTR.1;Parent=Cre07.g349600.t1.2.v5.5;pacid=30775243	-120
chromosome_11	2438530	2438531	1174	+	chromosome_11	five_prime_UTR	2438179	2438412	-	ID=Cre11.g475200.t1.1.v5.5.five_prime_UTR.1;Parent=Cre11.g475200.t1.1.v5.5;pacid=30775618	-119
chromosome_3	3848187	3848188	20	+	chromosome_3	five_prime_UTR	3847994	3848069	-	ID=Cre03.g170750.t1.2.v5.5.five_prime_UTR.1;Parent=Cre03.g170750.t1.2.v5.5;pacid=30786644	-119
chromosome_7	5310792	5310793	266	+	chromosome_7	five_prime_UTR	5310324	5310674	-	ID=Cre07.g349600.t1.2.v5.5.five_prime_UTR.1;Parent=Cre07.g349600.t1.2.v5.5;pacid=30775243	-119
chromosome_10	2349549	2349550	56	+	chromosome_10	five_prime_UTR	2349403	2349432	-	ID=Cre10.g434967.t1.1.v5.5.five_prime_UTR.1;Parent=Cre10.g434967.t1.1.v5.5;pacid=30790701	-118
chromosome_11	2438529	2438530	2607	+	chromosome_11	five_prime_UTR	2438179	2438412	-	ID=Cre11.g475200.t1.1.v5.5.five_prime_UTR.1;Parent=Cre11.g475200.t1.1.v5.5;pacid=30775618	-118
chromosome_3	3848186	3848187	16	+	chromosome_3	five_prime_UTR	3847994	3848069	-	ID=Cre03.g170750.t1.2.v5.5.five_prime_UTR.1;Parent=Cre03.g170750.t1.2.v5.5;pacid=30786644	-118
chromosome_7	5310791	5310792	106	+	chromosome_7	five_prime_UTR	5310324	5310674	-	ID=Cre07.g349600.t1.2.v5.5.five_prime_UTR.1;Parent=Cre07.g349600.t1.2.v5.5;pacid=30775243	-118
chromosome_11	2438528	2438529	14645	+	chromosome_11	five_prime_UTR	2438179	2438412	-	ID=Cre11.g475200.t1.1.v5.5.five_prime_UTR.1;Parent=Cre11.g475200.t1.1.v5.5;pacid=30775618	-117
chromosome_3	3848185	3848186	49	+	chromosome_3	five_prime_UTR	3847994	3848069	-	ID=Cre03.g170750.t1.2.v5.5.five_prime_UTR.1;Parent=Cre03.g170750.t1.2.v5.5;pacid=30786644	-117
chromosome_7	5310790	5310791	491	+	chromosome_7	five_prime_UTR	5310324	5310674	-	ID=Cre07.g349600.t1.2.v5.5.five_prime_UTR.1;Parent=Cre07.g349600.t1.2.v5.5;pacid=30775243	-117
chromosome_10	2349547	2349548	24	+	chromosome_10	five_prime_UTR	2349403	2349432	-	ID=Cre10.g434967.t1.1.v5.5.five_prime_UTR.1;Parent=Cre10.g434967.t1.1.v5.5;pacid=30790701	-116
chromosome_11	2438527	2438528	1197	+	chromosome_11	five_prime_UTR	2438179	2438412	-	ID=Cre11.g475200.t1.1.v5.5.five_prime_UTR.1;Parent=Cre11.g475200.t1.1.v5.5;pacid=30775618	-116
chromosome_7	5310789	5310790	114	+	chromosome_7	five_prime_UTR	5310324	5310674	-	ID=Cre07.g349600.t1.2.v5.5.five_prime_UTR.1;Parent=Cre07.g349600.t1.2.v5.5;pacid=30775243	-116
chromosome_11	2438526	2438527	6390	+	chromosome_11	five_prime_UTR	2438179	2438412	-	ID=Cre11.g475200.t1.1.v5.5.five_prime_UTR.1;Parent=Cre11.g475200.t1.1.v5.5;pacid=30775618	-115
chromosome_7	5310788	5310789	57	+	chromosome_7	five_prime_UTR	5310324	5310674	-	ID=Cre07.g349600.t1.2.v5.5.five_prime_UTR.1;Parent=Cre07.g349600.t1.2.v5.5;pacid=30775243	-115
chromosome_11	2438525	2438526	562	+	chromosome_11	five_prime_UTR	2438179	2438412	-	ID=Cre11.g475200.t1.1.v5.5.five_prime_UTR.1;Parent=Cre11.g475200.t1.1.v5.5;pacid=30775618	-114
chromosome_7	5310787	5310788	91	+	chromosome_7	five_prime_UTR	5310324	5310674	-	ID=Cre07.g349600.t1.2.v5.5.five_prime_UTR.1;Parent=Cre07.g349600.t1.2.v5.5;pacid=30775243	-114
chromosome_10	2349544	2349545	13	+	chromosome_10	five_prime_UTR	2349403	2349432	-	ID=Cre10.g434967.t1.1.v5.5.five_prime_UTR.1;Parent=Cre10.g434967.t1.1.v5.5;pacid=30790701	-113
chromosome_11	2438524	2438525	18	+	chromosome_11	five_prime_UTR	2438179	2438412	-	ID=Cre11.g475200.t1.1.v5.5.five_prime_UTR.1;Parent=Cre11.g475200.t1.1.v5.5;pacid=30775618	-113
chromosome_7	5310786	5310787	67	+	chromosome_7	five_prime_UTR	5310324	5310674	-	ID=Cre07.g349600.t1.2.v5.5.five_prime_UTR.1;Parent=Cre07.g349600.t1.2.v5.5;pacid=30775243	-113
chromosome_9	5912690	5912691	13	-	chromosome_9	five_prime_UTR	5912798	5913002	+	ID=Cre09.g402589.t1.1.v5.5.five_prime_UTR.1;Parent=Cre09.g402589.t1.1.v5.5;pacid=30781221	-107
chromosome_2	4110200	4110201	10	-	chromosome_2	five_prime_UTR	4110306	4110509	+	ID=Cre02.g097800.t1.1.v5.5.five_prime_UTR.1;Parent=Cre02.g097800.t1.1.v5.5;pacid=30785105	-105
chromosome_2	4110201	4110202	32	-	chromosome_2	five_prime_UTR	4110306	4110509	+	ID=Cre02.g097800.t1.1.v5.5.five_prime_UTR.1;Parent=Cre02.g097800.t1.1.v5.5;pacid=30785105	-104
chromosome_9	5912695	5912696	12	-	chromosome_9	five_prime_UTR	5912798	5913002	+	ID=Cre09.g402589.t1.1.v5.5.five_prime_UTR.1;Parent=Cre09.g402589.t1.1.v5.5;pacid=30781221	-102
chromosome_3	4936854	4936855	20	-	chromosome_3	five_prime_UTR	4936944	4937081	+	ID=Cre03.g179901.t1.1.v5.5.five_prime_UTR.1;Parent=Cre03.g179901.t1.1.v5.5;pacid=30787277	-89
chromosome_7	1273876	1273877	12	+	chromosome_7	five_prime_UTR	1273690	1273791	-	ID=Cre07.g321700.t1.2.v5.5.five_prime_UTR.1;Parent=Cre07.g321700.t1.2.v5.5;pacid=30775069	-86
chromosome_3	4936858	4936859	19	-	chromosome_3	five_prime_UTR	4936944	4937081	+	ID=Cre03.g179901.t1.1.v5.5.five_prime_UTR.1;Parent=Cre03.g179901.t1.1.v5.5;pacid=30787277	-85
chromosome_2	4110233	4110234	20	-	chromosome_2	five_prime_UTR	4110306	4110509	+	ID=Cre02.g097800.t1.1.v5.5.five_prime_UTR.1;Parent=Cre02.g097800.t1.1.v5.5;pacid=30785105	-72
chromosome_10	6288409	6288410	73	+	chromosome_10	five_prime_UTR	6287933	6288340	-	ID=Cre10.g465026.t1.1.v5.5.five_prime_UTR.1;Parent=Cre10.g465026.t1.1.v5.5;pacid=30789790	-70
chromosome_scaffold_19	168728	168729	11	-	chromosome_scaffold_19	five_prime_UTR	168799	169075	+	ID=Cre19.g751097.t1.1.v5.5.five_prime_UTR.1;Parent=Cre19.g751097.t1.1.v5.5;pacid=30778352	-70
chromosome_2	4110236	4110237	15	-	chromosome_2	five_prime_UTR	4110306	4110509	+	ID=Cre02.g097800.t1.1.v5.5.five_prime_UTR.1;Parent=Cre02.g097800.t1.1.v5.5;pacid=30785105	-69
chromosome_10	6288407	6288408	14	+	chromosome_10	five_prime_UTR	6287933	6288340	-	ID=Cre10.g465026.t1.1.v5.5.five_prime_UTR.1;Parent=Cre10.g465026.t1.1.v5.5;pacid=30789790	-68
chromosome_3	4855186	4855187	15	-	chromosome_3	five_prime_UTR	4855255	4855520	+	ID=Cre03.g179200.t1.2.v5.5.five_prime_UTR.1;Parent=Cre03.g179200.t1.2.v5.5;pacid=30787839	-68
chromosome_10	6288405	6288406	11	+	chromosome_10	five_prime_UTR	6287933	6288340	-	ID=Cre10.g465026.t1.1.v5.5.five_prime_UTR.1;Parent=Cre10.g465026.t1.1.v5.5;pacid=30789790	-66
chromosome_8	3924546	3924547	10	-	chromosome_8	five_prime_UTR	3924604	3924716	+	ID=Cre08.g378400.t1.2.v5.5.five_prime_UTR.1;Parent=Cre08.g378400.t1.2.v5.5;pacid=30774107	-57
chromosome_8	3924547	3924548	15	-	chromosome_8	five_prime_UTR	3924604	3924716	+	ID=Cre08.g378400.t1.2.v5.5.five_prime_UTR.1;Parent=Cre08.g378400.t1.2.v5.5;pacid=30774107	-56
chromosome_8	3924548	3924549	487	-	chromosome_8	five_prime_UTR	3924604	3924716	+	ID=Cre08.g378400.t1.2.v5.5.five_prime_UTR.1;Parent=Cre08.g378400.t1.2.v5.5;pacid=30774107	-55
chromosome_11	3054891	3054892	24	-	chromosome_11	five_prime_UTR	3054946	3054972	+	ID=Cre11.g478950.t1.2.v5.5.five_prime_UTR.1;Parent=Cre11.g478950.t1.2.v5.5;pacid=30775827	-54
chromosome_12	875108	875109	25	+	chromosome_12	five_prime_UTR	875001	875055	-	ID=Cre12.g495956.t1.1.v5.5.five_prime_UTR.1;Parent=Cre12.g495956.t1.1.v5.5;pacid=30793398	-54
chromosome_12	7633696	7633697	11	-	chromosome_12	five_prime_UTR	7633751	7633870	+	ID=Cre12.g554850.t1.2.v5.5.five_prime_UTR.1;Parent=Cre12.g554850.t1.2.v5.5;pacid=30792428	-54
chromosome_8	3924549	3924550	315	-	chromosome_8	five_prime_UTR	3924604	3924716	+	ID=Cre08.g378400.t1.2.v5.5.five_prime_UTR.1;Parent=Cre08.g378400.t1.2.v5.5;pacid=30774107	-54
chromosome_8	3924550	3924551	1479	-	chromosome_8	five_prime_UTR	3924604	3924716	+	ID=Cre08.g378400.t1.2.v5.5.five_prime_UTR.1;Parent=Cre08.g378400.t1.2.v5.5;pacid=30774107	-53
chromosome_11	296896	296897	12	-	chromosome_11	five_prime_UTR	296949	297188	+	ID=Cre11.g467562.t1.1.v5.5.five_prime_UTR.1;Parent=Cre11.g467562.t1.1.v5.5;pacid=30775854	-52
chromosome_11	3054893	3054894	15	-	chromosome_11	five_prime_UTR	3054946	3054972	+	ID=Cre11.g478950.t1.2.v5.5.five_prime_UTR.1;Parent=Cre11.g478950.t1.2.v5.5;pacid=30775827	-52
chromosome_12	5495473	5495474	14	-	chromosome_12	five_prime_UTR	5495526	5495669	+	ID=Cre12.g530950.t1.1.v5.5.five_prime_UTR.1;Parent=Cre12.g530950.t1.1.v5.5;pacid=30793003	-52
chromosome_8	3924551	3924552	123	-	chromosome_8	five_prime_UTR	3924604	3924716	+	ID=Cre08.g378400.t1.2.v5.5.five_prime_UTR.1;Parent=Cre08.g378400.t1.2.v5.5;pacid=30774107	-52
chromosome_2	7972835	7972836	125	-	chromosome_2	five_prime_UTR	7972887	7973079	+	ID=Cre02.g141005.t1.1.v5.5.five_prime_UTR.1;Parent=Cre02.g141005.t1.1.v5.5;pacid=30786055	-51
chromosome_7	4338519	4338520	12	-	chromosome_7	five_prime_UTR	4338571	4338805	+	ID=Cre07.g341250.t1.2.v5.5.five_prime_UTR.1;Parent=Cre07.g341250.t1.2.v5.5;pacid=30774778	-51
chromosome_8	3924552	3924553	64	-	chromosome_8	five_prime_UTR	3924604	3924716	+	ID=Cre08.g378400.t1.2.v5.5.five_prime_UTR.1;Parent=Cre08.g378400.t1.2.v5.5;pacid=30774107	-51
chromosome_16	783782	783783	15	+	chromosome_16	five_prime_UTR	783541	783733	-	ID=Cre16.g690700.t1.1.v5.5.five_prime_UTR.1;Parent=Cre16.g690700.t1.1.v5.5;pacid=30777084	-50
chromosome_8	3924553	3924554	60	-	chromosome_8	five_prime_UTR	3924604	3924716	+	ID=Cre08.g378400.t1.2.v5.5.five_prime_UTR.1;Parent=Cre08.g378400.t1.2.v5.5;pacid=30774107	-50
chromosome_2	7972837	7972838	75	-	chromosome_2	five_prime_UTR	7972887	7973079	+	ID=Cre02.g141005.t1.1.v5.5.five_prime_UTR.1;Parent=Cre02.g141005.t1.1.v5.5;pacid=30786055	-49
chromosome_8	1016046	1016047	13	-	chromosome_8	five_prime_UTR	1016096	1016322	+	ID=Cre08.g362050.t1.2.v5.5.five_prime_UTR.1;Parent=Cre08.g362050.t1.2.v5.5;pacid=30773890	-49
chromosome_8	3924554	3924555	112	-	chromosome_8	five_prime_UTR	3924604	3924716	+	ID=Cre08.g378400.t1.2.v5.5.five_prime_UTR.1;Parent=Cre08.g378400.t1.2.v5.5;pacid=30774107	-49
chromosome_2	7972838	7972839	13	-	chromosome_2	five_prime_UTR	7972887	7973079	+	ID=Cre02.g141005.t1.1.v5.5.five_prime_UTR.1;Parent=Cre02.g141005.t1.1.v5.5;pacid=30786055	-48
chromosome_11	438340	438341	11	+	chromosome_11	five_prime_UTR	438179	438294	-	ID=Cre11.g467587.t1.1.v5.5.five_prime_UTR.1;Parent=Cre11.g467587.t1.1.v5.5;pacid=30775883	-47
chromosome_16	783779	783780	16	+	chromosome_16	five_prime_UTR	783541	783733	-	ID=Cre16.g690700.t1.1.v5.5.five_prime_UTR.1;Parent=Cre16.g690700.t1.1.v5.5;pacid=30777084	-47
chromosome_2	7972839	7972840	32	-	chromosome_2	five_prime_UTR	7972887	7973079	+	ID=Cre02.g141005.t1.1.v5.5.five_prime_UTR.1;Parent=Cre02.g141005.t1.1.v5.5;pacid=30786055	-47
chromosome_8	3924556	3924557	16	-	chromosome_8	five_prime_UTR	3924604	3924716	+	ID=Cre08.g378400.t1.2.v5.5.five_prime_UTR.1;Parent=Cre08.g378400.t1.2.v5.5;pacid=30774107	-47
chromosome_2	7972843	7972844	38	-	chromosome_2	five_prime_UTR	7972887	7973079	+	ID=Cre02.g141005.t1.1.v5.5.five_prime_UTR.1;Parent=Cre02.g141005.t1.1.v5.5;pacid=30786055	-43
chromosome_17	3419193	3419194	18	+	chromosome_17	five_prime_UTR	3418608	3419161	-	ID=Cre17.g724276.t1.1.v5.5.five_prime_UTR.1;Parent=Cre17.g724276.t1.1.v5.5;pacid=30781630	-33
chromosome_7	5802988	5802989	13	-	chromosome_7	five_prime_UTR	5803022	5803103	+	ID=Cre07.g353250.t1.2.v5.5.five_prime_UTR.1;Parent=Cre07.g353250.t1.2.v5.5;pacid=30774254	-33
chromosome_17	3419192	3419193	14	+	chromosome_17	five_prime_UTR	3418608	3419161	-	ID=Cre17.g724276.t1.1.v5.5.five_prime_UTR.1;Parent=Cre17.g724276.t1.1.v5.5;pacid=30781630	-32
chromosome_2	1868241	1868242	13	+	chromosome_2	five_prime_UTR	1868060	1868211	-	ID=Cre02.g087500.t1.1.v5.5.five_prime_UTR.1;Parent=Cre02.g087500.t1.1.v5.5;pacid=30785075	-31
chromosome_5	1956741	1956742	10	+	chromosome_5	five_prime_UTR	1956343	1956718	-	ID=Cre05.g241636.t1.1.v5.5.five_prime_UTR.1;Parent=Cre05.g241636.t1.1.v5.5;pacid=30782966	-24
chromosome_16	1115916	1115917	11	+	chromosome_16	five_prime_UTR	1115629	1115895	-	ID=Cre16.g649800.t1.1.v5.5.five_prime_UTR.1;Parent=Cre16.g649800.t1.1.v5.5;pacid=30777657	-22
chromosome_16	1115914	1115915	13	+	chromosome_16	five_prime_UTR	1115629	1115895	-	ID=Cre16.g649800.t1.1.v5.5.five_prime_UTR.1;Parent=Cre16.g649800.t1.1.v5.5;pacid=30777657	-20
chromosome_14	4154757	4154758	19	-	chromosome_14	five_prime_UTR	4154776	4155163	+	ID=Cre14.g634365.t1.1.v5.5.five_prime_UTR.1;Parent=Cre14.g634365.t1.1.v5.5;pacid=30776651	-18
chromosome_3	5592679	5592680	15	-	chromosome_3	five_prime_UTR	5592698	5592839	+	ID=Cre03.g186800.t1.2.v5.5.five_prime_UTR.1;Parent=Cre03.g186800.t1.2.v5.5;pacid=30787772	-18
chromosome_12	5318998	5318999	21	+	chromosome_12	five_prime_UTR	5318804	5318982	-	ID=Cre12.g529200.t1.1.v5.5.five_prime_UTR.1;Parent=Cre12.g529200.t1.1.v5.5;pacid=30792984	-17
chromosome_14	4154758	4154759	28	-	chromosome_14	five_prime_UTR	4154776	4155163	+	ID=Cre14.g634365.t1.1.v5.5.five_prime_UTR.1;Parent=Cre14.g634365.t1.1.v5.5;pacid=30776651	-17
chromosome_10	5980937	5980938	12	+	chromosome_10	five_prime_UTR	5980873	5980922	-	ID=Cre10.g462500.t1.1.v5.5.five_prime_UTR.1;Parent=Cre10.g462500.t1.1.v5.5;pacid=30790181	-16
chromosome_6	269939	269940	16	+	chromosome_6	five_prime_UTR	269594	269924	-	ID=Cre06.g250850.t1.1.v5.5.five_prime_UTR.1;Parent=Cre06.g250850.t1.1.v5.5;pacid=30779955	-16
chromosome_10	5980936	5980937	21	+	chromosome_10	five_prime_UTR	5980873	5980922	-	ID=Cre10.g462500.t1.1.v5.5.five_prime_UTR.1;Parent=Cre10.g462500.t1.1.v5.5;pacid=30790181	-15
chromosome_10	5980935	5980936	53	+	chromosome_10	five_prime_UTR	5980873	5980922	-	ID=Cre10.g462500.t1.1.v5.5.five_prime_UTR.1;Parent=Cre10.g462500.t1.1.v5.5;pacid=30790181	-14
chromosome_6	8128968	8128969	10	+	chromosome_6	five_prime_UTR	8128821	8128955	-	ID=Cre06.g304913.t1.1.v5.5.five_prime_UTR.1;Parent=Cre06.g304913.t1.1.v5.5;pacid=30778644	-14
chromosome_14	4154762	4154763	14	-	chromosome_14	five_prime_UTR	4154776	4155163	+	ID=Cre14.g634365.t1.1.v5.5.five_prime_UTR.1;Parent=Cre14.g634365.t1.1.v5.5;pacid=30776651	-13
chromosome_8	4526722	4526723	10	-	chromosome_8	five_prime_UTR	4526735	4527093	+	ID=Cre08.g382650.t1.1.v5.5.five_prime_UTR.1;Parent=Cre08.g382650.t1.1.v5.5;pacid=30774088	-12
chromosome_9	7304330	7304331	15	+	chromosome_9	five_prime_UTR	7304215	7304319	-	ID=Cre09.g412803.t1.2.v5.5.five_prime_UTR.1;Parent=Cre09.g412803.t1.2.v5.5;pacid=30780332	-12
chromosome_1	4188392	4188393	25	+	chromosome_1	five_prime_UTR	4188342	4188382	-	ID=Cre01.g027750.t1.1.v5.5.five_prime_UTR.1;Parent=Cre01.g027750.t1.1.v5.5;pacid=30789020	-11
chromosome_9	3253967	3253968	17	-	chromosome_9	five_prime_UTR	3253979	3254103	+	ID=Cre09.g387875.t1.1.v5.5.five_prime_UTR.1;Parent=Cre09.g387875.t1.1.v5.5;pacid=30781201	-11
chromosome_1	6854961	6854962	14	+	chromosome_1	five_prime_UTR	6854898	6854952	-	ID=Cre01.g049500.t1.2.v5.5.five_prime_UTR.1;Parent=Cre01.g049500.t1.2.v5.5;pacid=30789276	-10
chromosome_8	4526724	4526725	33	-	chromosome_8	five_prime_UTR	4526735	4527093	+	ID=Cre08.g382650.t1.1.v5.5.five_prime_UTR.1;Parent=Cre08.g382650.t1.1.v5.5;pacid=30774088	-10
chromosome_9	7304328	7304329	15	+	chromosome_9	five_prime_UTR	7304215	7304319	-	ID=Cre09.g412803.t1.2.v5.5.five_prime_UTR.1;Parent=Cre09.g412803.t1.2.v5.5;pacid=30780332	-10
chromosome_9	1929026	1929027	12	-	chromosome_9	five_prime_UTR	1929036	1929116	+	ID=Cre09.g395100.t1.2.v5.5.five_prime_UTR.1;Parent=Cre09.g395100.t1.2.v5.5;pacid=30781539	-9
chromosome_1	4188389	4188390	13	+	chromosome_1	five_prime_UTR	4188342	4188382	-	ID=Cre01.g027750.t1.1.v5.5.five_prime_UTR.1;Parent=Cre01.g027750.t1.1.v5.5;pacid=30789020	-8
chromosome_10	1534028	1534029	16	+	chromosome_10	five_prime_UTR	1533958	1534021	-	ID=Cre10.g429000.t1.1.v5.5.five_prime_UTR.1;Parent=Cre10.g429000.t1.1.v5.5;pacid=30790811	-8
chromosome_10	4673984	4673985	12	+	chromosome_10	five_prime_UTR	4673894	4673977	-	ID=Cre10.g453350.t1.2.v5.5.five_prime_UTR.1;Parent=Cre10.g453350.t1.2.v5.5;pacid=30789969	-8
chromosome_10	6389474	6389475	10	-	chromosome_10	five_prime_UTR	6389483	6389512	+	ID=Cre10.g465700.t1.2.v5.5.five_prime_UTR.1;Parent=Cre10.g465700.t1.2.v5.5;pacid=30790103	-8
chromosome_8	4526726	4526727	41	-	chromosome_8	five_prime_UTR	4526735	4527093	+	ID=Cre08.g382650.t1.1.v5.5.five_prime_UTR.1;Parent=Cre08.g382650.t1.1.v5.5;pacid=30774088	-8
chromosome_9	3253970	3253971	12	-	chromosome_9	five_prime_UTR	3253979	3254103	+	ID=Cre09.g387875.t1.1.v5.5.five_prime_UTR.1;Parent=Cre09.g387875.t1.1.v5.5;pacid=30781201	-8
chromosome_12	9357551	9357552	18	-	chromosome_12	five_prime_UTR	9357559	9357601	+	ID=Cre12.g540500.t1.2.v5.5.five_prime_UTR.1;Parent=Cre12.g540500.t1.2.v5.5;pacid=30792634	-7
chromosome_9	1929028	1929029	13	-	chromosome_9	five_prime_UTR	1929036	1929116	+	ID=Cre09.g395100.t1.2.v5.5.five_prime_UTR.1;Parent=Cre09.g395100.t1.2.v5.5;pacid=30781539	-7
chromosome_10	1534026	1534027	25	+	chromosome_10	five_prime_UTR	1533958	1534021	-	ID=Cre10.g429000.t1.1.v5.5.five_prime_UTR.1;Parent=Cre10.g429000.t1.1.v5.5;pacid=30790811	-6
chromosome_12	9357552	9357553	15	-	chromosome_12	five_prime_UTR	9357559	9357601	+	ID=Cre12.g540500.t1.2.v5.5.five_prime_UTR.1;Parent=Cre12.g540500.t1.2.v5.5;pacid=30792634	-6
chromosome_8	4330993	4330994	10	-	chromosome_8	five_prime_UTR	4331000	4331098	+	ID=Cre08.g381516.t1.1.v5.5.five_prime_UTR.1;Parent=Cre08.g381516.t1.1.v5.5;pacid=30773746	-6
chromosome_12	225564	225565	13	-	chromosome_12	five_prime_UTR	225570	225693	+	ID=Cre12.g485100.t1.2.v5.5.five_prime_UTR.1;Parent=Cre12.g485100.t1.2.v5.5;pacid=30793627	-5
chromosome_12	7795969	7795970	21	-	chromosome_12	five_prime_UTR	7795975	7796221	+	ID=Cre12.g553500.t1.1.v5.5.five_prime_UTR.1;Parent=Cre12.g553500.t1.1.v5.5;pacid=30792826	-5
chromosome_9	6153099	6153100	11	+	chromosome_9	five_prime_UTR	6152896	6153095	-	ID=Cre09.g405600.t1.2.v5.5.five_prime_UTR.1;Parent=Cre09.g405600.t1.2.v5.5;pacid=30781186	-5
chromosome_13	5194455	5194456	16	-	chromosome_13	five_prime_UTR	5194460	5194705	+	ID=Cre13.g608000.t1.2.v5.5.five_prime_UTR.1;Parent=Cre13.g608000.t1.2.v5.5;pacid=30784318	-4
chromosome_5	1845499	1845500	22	-	chromosome_5	five_prime_UTR	1845504	1845622	+	ID=Cre05.g241850.t1.2.v5.5.five_prime_UTR.1;Parent=Cre05.g241850.t1.2.v5.5;pacid=30783228	-4
chromosome_12	7795971	7795972	39	-	chromosome_12	five_prime_UTR	7795975	7796221	+	ID=Cre12.g553500.t1.1.v5.5.five_prime_UTR.1;Parent=Cre12.g553500.t1.1.v5.5;pacid=30792826	-3
chromosome_13	5194456	5194457	22	-	chromosome_13	five_prime_UTR	5194460	5194705	+	ID=Cre13.g608000.t1.2.v5.5.five_prime_UTR.1;Parent=Cre13.g608000.t1.2.v5.5;pacid=30784318	-3
chromosome_14	4154772	4154773	53	-	chromosome_14	five_prime_UTR	4154776	4155163	+	ID=Cre14.g634365.t1.1.v5.5.five_prime_UTR.1;Parent=Cre14.g634365.t1.1.v5.5;pacid=30776651	-3
chromosome_16	1779823	1779824	10	-	chromosome_16	five_prime_UTR	1779827	1780055	+	ID=Cre16.g655150.t1.2.v5.5.five_prime_UTR.1;Parent=Cre16.g655150.t1.2.v5.5;pacid=30777204	-3
chromosome_2	7078736	7078737	18	-	chromosome_2	five_prime_UTR	7078740	7078829	+	ID=Cre02.g147100.t1.1.v5.5.five_prime_UTR.1;Parent=Cre02.g147100.t1.1.v5.5;pacid=30785172	-3
chromosome_9	6153097	6153098	21	+	chromosome_9	five_prime_UTR	6152896	6153095	-	ID=Cre09.g405600.t1.2.v5.5.five_prime_UTR.1;Parent=Cre09.g405600.t1.2.v5.5;pacid=30781186	-3
chromosome_12	363310	363311	15	+	chromosome_12	five_prime_UTR	363041	363309	-	ID=Cre12.g494250.t1.2.v5.5.five_prime_UTR.1;Parent=Cre12.g494250.t1.2.v5.5;pacid=30793332	-2
chromosome_12	7795973	7795974	24	-	chromosome_12	five_prime_UTR	7795975	7796221	+	ID=Cre12.g553500.t1.1.v5.5.five_prime_UTR.1;Parent=Cre12.g553500.t1.1.v5.5;pacid=30792826	-1
chromosome_14	4153875	4153876	13	+	.	.	-1	-1	.	.	-1
chromosome_14	4155112	4155113	13	+	.	.	-1	-1	.	.	-1
chromosome_14	4155232	4155233	44	+	.	.	-1	-1	.	.	-1
chromosome_14	4155238	4155239	12	+	.	.	-1	-1	.	.	-1
chromosome_14	4155258	4155259	11	+	.	.	-1	-1	.	.	-1
chromosome_14	4155259	4155260	33	+	.	.	-1	-1	.	.	-1
chromosome_8	5027249	5027250	14	-	.	.	-1	-1	.	.	-1
chromosome_8	5027991	5027992	12	-	.	.	-1	-1	.	.	-1
chromosome_8	5028027	5028028	35	-	.	.	-1	-1	.	.	-1
chromosome_8	5028061	5028062	10	-	.	.	-1	-1	.	.	-1
chromosome_8	5028109	5028110	16	-	.	.	-1	-1	.	.	-1
chromosome_8	5028111	5028112	19	-	.	.	-1	-1	.	.	-1
chromosome_8	5028112	5028113	41	-	.	.	-1	-1	.	.	-1
chromosome_8	5028113	5028114	1273	-	.	.	-1	-1	.	.	-1
chromosome_8	5028172	5028173	21	-	.	.	-1	-1	.	.	-1
chromosome_8	5028175	5028176	24	-	.	.	-1	-1	.	.	-1
chromosome_8	5028177	5028178	11	-	.	.	-1	-1	.	.	-1
chromosome_8	5028181	5028182	81	-	.	.	-1	-1	.	.	-1
chromosome_8	5028245	5028246	30	-	.	.	-1	-1	.	.	-1
chromosome_8	5028246	5028247	84	-	.	.	-1	-1	.	.	-1
chromosome_8	5028247	5028248	46	-	.	.	-1	-1	.	.	-1
chromosome_8	5028248	5028249	78	-	.	.	-1	-1	.	.	-1
chromosome_8	5028249	5028250	122	-	.	.	-1	-1	.	.	-1
chromosome_8	5028250	5028251	2077	-	.	.	-1	-1	.	.	-1
chromosome_8	5028252	5028253	28	-	.	.	-1	-1	.	.	-1
chromosome_8	5028253	5028254	17	-	.	.	-1	-1	.	.	-1
chromosome_8	5028254	5028255	15	-	.	.	-1	-1	.	.	-1
chromosome_8	5028259	5028260	47	-	.	.	-1	-1	.	.	-1
chromosome_8	5028272	5028273	23	-	.	.	-1	-1	.	.	-1
chromosome_8	5028273	5028274	14	-	.	.	-1	-1	.	.	-1
chromosome_8	5028274	5028275	399	-	.	.	-1	-1	.	.	-1
chromosome_8	5028276	5028277	29	-	.	.	-1	-1	.	.	-1
chromosome_8	5028277	5028278	127	-	.	.	-1	-1	.	.	-1
chromosome_8	5028278	5028279	25	-	.	.	-1	-1	.	.	-1
chromosome_8	5028279	5028280	11	-	.	.	-1	-1	.	.	-1
chromosome_8	5028280	5028281	29	-	.	.	-1	-1	.	.	-1
chromosome_8	5028281	5028282	21	-	.	.	-1	-1	.	.	-1
chromosome_8	5028282	5028283	210	-	.	.	-1	-1	.	.	-1
chromosome_8	5028284	5028285	1740	-	.	.	-1	-1	.	.	-1
chromosome_8	5028286	5028287	13	-	.	.	-1	-1	.	.	-1
chromosome_8	5028287	5028288	965	-	.	.	-1	-1	.	.	-1
chromosome_8	5028294	5028295	20	-	.	.	-1	-1	.	.	-1
chromosome_8	5028304	5028305	111	-	.	.	-1	-1	.	.	-1
chromosome_8	5028306	5028307	127	-	.	.	-1	-1	.	.	-1
chromosome_8	5028318	5028319	12	-	.	.	-1	-1	.	.	-1
chromosome_8	5028321	5028322	34	-	.	.	-1	-1	.	.	-1
chromosome_8	5028324	5028325	49	-	.	.	-1	-1	.	.	-1
chromosome_8	5028331	5028332	71	-	.	.	-1	-1	.	.	-1
chromosome_8	5028333	5028334	482	-	.	.	-1	-1	.	.	-1
chromosome_8	5028336	5028337	11	-	.	.	-1	-1	.	.	-1
chromosome_8	5028337	5028338	25	-	.	.	-1	-1	.	.	-1
chromosome_8	5028338	5028339	735	-	.	.	-1	-1	.	.	-1
chromosome_8	5028345	5028346	30	-	.	.	-1	-1	.	.	-1
chromosome_8	5028351	5028352	72	-	.	.	-1	-1	.	.	-1
chromosome_8	5028353	5028354	112	-	.	.	-1	-1	.	.	-1
chromosome_8	5028354	5028355	239	-	.	.	-1	-1	.	.	-1
chromosome_8	5028355	5028356	43	-	.	.	-1	-1	.	.	-1
chromosome_8	5028357	5028358	32	-	.	.	-1	-1	.	.	-1
chromosome_8	5028358	5028359	48	-	.	.	-1	-1	.	.	-1
chromosome_8	5028363	5028364	55	-	.	.	-1	-1	.	.	-1
chromosome_8	5028365	5028366	29	-	.	.	-1	-1	.	.	-1
chromosome_8	5028366	5028367	122	-	.	.	-1	-1	.	.	-1
chromosome_8	5028367	5028368	140	-	.	.	-1	-1	.	.	-1
chromosome_8	5028368	5028369	2542	-	.	.	-1	-1	.	.	-1
chromosome_8	5028369	5028370	39	-	.	.	-1	-1	.	.	-1
chromosome_8	5028370	5028371	11	-	.	.	-1	-1	.	.	-1
chromosome_8	5028371	5028372	11	-	.	.	-1	-1	.	.	-1
chromosome_8	5028391	5028392	19	-	.	.	-1	-1	.	.	-1
chromosome_8	5028392	5028393	18	-	.	.	-1	-1	.	.	-1
chromosome_8	5028411	5028412	39	-	.	.	-1	-1	.	.	-1
chromosome_8	5028430	5028431	57	-	.	.	-1	-1	.	.	-1
chromosome_8	5028431	5028432	59	-	.	.	-1	-1	.	.	-1
chromosome_8	5028432	5028433	470	-	.	.	-1	-1	.	.	-1
chromosome_8	5028433	5028434	267	-	.	.	-1	-1	.	.	-1
chromosome_8	5028434	5028435	38	-	.	.	-1	-1	.	.	-1
chromosome_8	5028435	5028436	10	-	.	.	-1	-1	.	.	-1
chromosome_8	5028480	5028481	10	-	.	.	-1	-1	.	.	-1
chromosome_8	5028558	5028559	10	-	.	.	-1	-1	.	.	-1
chromosome_8	5028566	5028567	22	-	.	.	-1	-1	.	.	-1
chromosome_8	5028567	5028568	17	-	.	.	-1	-1	.	.	-1
chromosome_8	5028568	5028569	107	-	.	.	-1	-1	.	.	-1
chromosome_8	5028569	5028570	1813	-	.	.	-1	-1	.	.	-1
chromosome_8	5028578	5028579	10	-	.	.	-1	-1	.	.	-1
chromosome_8	5028581	5028582	20	-	.	.	-1	-1	.	.	-1
chromosome_8	5028582	5028583	21	-	.	.	-1	-1	.	.	-1
chromosome_8	5028583	5028584	404	-	.	.	-1	-1	.	.	-1
chromosome_8	5028588	5028589	11	-	.	.	-1	-1	.	.	-1
chromosome_8	5028590	5028591	22	-	.	.	-1	-1	.	.	-1
chromosome_8	5028591	5028592	20	-	.	.	-1	-1	.	.	-1
chromosome_8	5028592	5028593	20	-	.	.	-1	-1	.	.	-1
chromosome_8	5028593	5028594	28	-	.	.	-1	-1	.	.	-1
chromosome_8	5028597	5028598	12	-	.	.	-1	-1	.	.	-1
chromosome_8	5028600	5028601	10	-	.	.	-1	-1	.	.	-1
chromosome_8	5028601	5028602	20	-	.	.	-1	-1	.	.	-1
chromosome_8	5028602	5028603	172	-	.	.	-1	-1	.	.	-1
chromosome_8	5028605	5028606	38	-	.	.	-1	-1	.	.	-1
chromosome_8	5028607	5028608	364	-	.	.	-1	-1	.	.	-1
chromosome_8	5028608	5028609	11	-	.	.	-1	-1	.	.	-1
chromosome_8	5028609	5028610	11	-	.	.	-1	-1	.	.	-1
chromosome_8	5028610	5028611	15	-	.	.	-1	-1	.	.	-1
chromosome_8	5028611	5028612	10	-	.	.	-1	-1	.	.	-1
chromosome_8	5028612	5028613	36	-	.	.	-1	-1	.	.	-1
chromosome_8	5028613	5028614	59	-	.	.	-1	-1	.	.	-1
chromosome_8	5028614	5028615	31	-	.	.	-1	-1	.	.	-1
chromosome_8	5028615	5028616	59	-	.	.	-1	-1	.	.	-1
chromosome_8	5028616	5028617	1737	-	.	.	-1	-1	.	.	-1
chromosome_8	5028617	5028618	3002	-	.	.	-1	-1	.	.	-1
chromosome_8	5028620	5028621	41	-	.	.	-1	-1	.	.	-1
chromosome_8	5028622	5028623	13	-	.	.	-1	-1	.	.	-1
chromosome_8	5028623	5028624	33	-	.	.	-1	-1	.	.	-1
chromosome_8	5028625	5028626	28	-	.	.	-1	-1	.	.	-1
chromosome_8	5028626	5028627	63	-	.	.	-1	-1	.	.	-1
chromosome_8	5028648	5028649	12	-	.	.	-1	-1	.	.	-1
chromosome_8	5028649	5028650	13	-	.	.	-1	-1	.	.	-1
chromosome_8	5028650	5028651	37	-	.	.	-1	-1	.	.	-1
chromosome_8	5028651	5028652	24	-	.	.	-1	-1	.	.	-1
chromosome_8	5028652	5028653	13	-	.	.	-1	-1	.	.	-1
chromosome_8	5028653	5028654	29	-	.	.	-1	-1	.	.	-1
chromosome_8	5028654	5028655	17	-	.	.	-1	-1	.	.	-1
chromosome_8	5028655	5028656	26	-	.	.	-1	-1	.	.	-1
chromosome_8	5028656	5028657	50	-	.	.	-1	-1	.	.	-1
chromosome_8	5028657	5028658	129	-	.	.	-1	-1	.	.	-1
chromosome_8	5028658	5028659	698	-	.	.	-1	-1	.	.	-1
chromosome_8	5028659	5028660	324	-	.	.	-1	-1	.	.	-1
chromosome_8	5028660	5028661	1454	-	.	.	-1	-1	.	.	-1
chromosome_8	5028661	5028662	31807	-	.	.	-1	-1	.	.	-1
chromosome_8	5028662	5028663	40676	-	.	.	-1	-1	.	.	-1
chromosome_8	5028663	5028664	8878	-	.	.	-1	-1	.	.	-1
chromosome_8	5028664	5028665	371	-	.	.	-1	-1	.	.	-1
chromosome_8	5028665	5028666	6406	-	.	.	-1	-1	.	.	-1
chromosome_8	5028666	5028667	46589	-	.	.	-1	-1	.	.	-1
chromosome_8	5028667	5028668	103	-	.	.	-1	-1	.	.	-1
chromosome_8	5028668	5028669	652	-	.	.	-1	-1	.	.	-1
chromosome_8	5028669	5028670	1996	-	.	.	-1	-1	.	.	-1
chromosome_8	5028670	5028671	20054	-	.	.	-1	-1	.	.	-1
chromosome_8	5028671	5028672	747	-	.	.	-1	-1	.	.	-1
chromosome_8	5028672	5028673	147	-	.	.	-1	-1	.	.	-1
chromosome_8	5028673	5028674	2168	-	.	.	-1	-1	.	.	-1
chromosome_8	5028674	5028675	282	-	.	.	-1	-1	.	.	-1
chromosome_8	5028675	5028676	85	-	.	.	-1	-1	.	.	-1
chromosome_8	5028676	5028677	43	-	.	.	-1	-1	.	.	-1
chromosome_8	5028677	5028678	17	-	.	.	-1	-1	.	.	-1
chromosome_8	5028678	5028679	30	-	.	.	-1	-1	.	.	-1
chromosome_8	5028679	5028680	35	-	.	.	-1	-1	.	.	-1
chromosome_8	5028680	5028681	77	-	.	.	-1	-1	.	.	-1
chromosome_8	5028681	5028682	89	-	.	.	-1	-1	.	.	-1
chromosome_8	5028682	5028683	78	-	.	.	-1	-1	.	.	-1
chromosome_8	5028683	5028684	46	-	.	.	-1	-1	.	.	-1
chromosome_8	5028684	5028685	14	-	.	.	-1	-1	.	.	-1
chromosome_8	5028688	5028689	17	-	.	.	-1	-1	.	.	-1
chromosome_8	5028689	5028690	39	-	.	.	-1	-1	.	.	-1
chromosome_8	5028690	5028691	40	-	.	.	-1	-1	.	.	-1
chromosome_8	5028691	5028692	27	-	.	.	-1	-1	.	.	-1
chromosome_8	5028692	5028693	83	-	.	.	-1	-1	.	.	-1
chromosome_8	5028714	5028715	47	-	.	.	-1	-1	.	.	-1
chromosome_8	5028715	5028716	48	-	.	.	-1	-1	.	.	-1
chromosome_8	5028716	5028717	576	-	.	.	-1	-1	.	.	-1
chromosome_8	5028734	5028735	22	-	.	.	-1	-1	.	.	-1
chromosome_8	5028742	5028743	10	-	.	.	-1	-1	.	.	-1
chromosome_8	5028747	5028748	13	-	.	.	-1	-1	.	.	-1
chromosome_8	5028748	5028749	53	-	.	.	-1	-1	.	.	-1
chromosome_8	5028749	5028750	353	-	.	.	-1	-1	.	.	-1
chromosome_8	5028750	5028751	2766	-	.	.	-1	-1	.	.	-1
chromosome_8	5028755	5028756	19	-	.	.	-1	-1	.	.	-1
chromosome_8	5028760	5028761	10	-	.	.	-1	-1	.	.	-1
chromosome_8	5028761	5028762	37	-	.	.	-1	-1	.	.	-1
chromosome_8	5028762	5028763	834	-	.	.	-1	-1	.	.	-1
chromosome_8	5028765	5028766	36	-	.	.	-1	-1	.	.	-1
chromosome_8	5028766	5028767	66	-	.	.	-1	-1	.	.	-1
chromosome_8	5028767	5028768	10	-	.	.	-1	-1	.	.	-1
chromosome_8	5028768	5028769	17	-	.	.	-1	-1	.	.	-1
chromosome_8	5028773	5028774	11	-	.	.	-1	-1	.	.	-1
chromosome_8	5028774	5028775	101	-	.	.	-1	-1	.	.	-1
chromosome_8	5028776	5028777	60	-	.	.	-1	-1	.	.	-1
chromosome_8	5028777	5028778	83	-	.	.	-1	-1	.	.	-1
chromosome_8	5028778	5028779	2111	-	.	.	-1	-1	.	.	-1
chromosome_8	5028779	5028780	1395	-	.	.	-1	-1	.	.	-1
chromosome_8	5028780	5028781	922	-	.	.	-1	-1	.	.	-1
chromosome_8	5028781	5028782	34611	-	.	.	-1	-1	.	.	-1
chromosome_8	5028782	5028783	51	-	.	.	-1	-1	.	.	-1
chromosome_8	5028783	5028784	22	-	.	.	-1	-1	.	.	-1
chromosome_8	5028784	5028785	899	-	.	.	-1	-1	.	.	-1
chromosome_8	5028785	5028786	12	-	.	.	-1	-1	.	.	-1
chromosome_8	5028786	5028787	79	-	.	.	-1	-1	.	.	-1
chromosome_8	5028787	5028788	226	-	.	.	-1	-1	.	.	-1
chromosome_8	5028788	5028789	227	-	.	.	-1	-1	.	.	-1
chromosome_8	5028791	5028792	19	-	.	.	-1	-1	.	.	-1
chromosome_8	5028798	5028799	17	-	.	.	-1	-1	.	.	-1
chromosome_8	5028799	5028800	18	-	.	.	-1	-1	.	.	-1
chromosome_8	5028800	5028801	30	-	.	.	-1	-1	.	.	-1
chromosome_8	5028803	5028804	61	-	.	.	-1	-1	.	.	-1
chromosome_8	5028809	5028810	64	-	.	.	-1	-1	.	.	-1
chromosome_8	5028833	5028834	11	-	.	.	-1	-1	.	.	-1
chromosome_8	5028834	5028835	661	-	.	.	-1	-1	.	.	-1
chromosome_8	5028836	5028837	202	-	.	.	-1	-1	.	.	-1
chromosome_8	5028846	5028847	10	-	.	.	-1	-1	.	.	-1
chromosome_8	5028847	5028848	22	-	.	.	-1	-1	.	.	-1
chromosome_8	5028854	5028855	15	-	.	.	-1	-1	.	.	-1
chromosome_8	5028890	5028891	20	-	.	.	-1	-1	.	.	-1
chromosome_8	5028892	5028893	74	-	.	.	-1	-1	.	.	-1
chromosome_8	5028893	5028894	124	-	.	.	-1	-1	.	.	-1
chromosome_8	5028894	5028895	183	-	.	.	-1	-1	.	.	-1
chromosome_8	5028895	5028896	7544	-	.	.	-1	-1	.	.	-1
chromosome_8	5028896	5028897	41	-	.	.	-1	-1	.	.	-1
chromosome_8	5028897	5028898	9368	-	.	.	-1	-1	.	.	-1
chromosome_8	5028899	5028900	13	-	.	.	-1	-1	.	.	-1
chromosome_8	5028900	5028901	98	-	.	.	-1	-1	.	.	-1
chromosome_8	5028901	5028902	42	-	.	.	-1	-1	.	.	-1
chromosome_8	5028902	5028903	1684	-	.	.	-1	-1	.	.	-1
chromosome_8	5028905	5028906	13	-	.	.	-1	-1	.	.	-1
chromosome_8	5028906	5028907	14	-	.	.	-1	-1	.	.	-1
chromosome_8	5028914	5028915	18	-	.	.	-1	-1	.	.	-1
chromosome_8	5028919	5028920	13	-	.	.	-1	-1	.	.	-1
chromosome_8	5028921	5028922	70	-	.	.	-1	-1	.	.	-1
chromosome_8	5028922	5028923	88	-	.	.	-1	-1	.	.	-1
chromosome_8	5028923	5028924	116	-	.	.	-1	-1	.	.	-1
chromosome_8	5028924	5028925	324	-	.	.	-1	-1	.	.	-1
chromosome_8	5028925	5028926	50	-	.	.	-1	-1	.	.	-1
chromosome_8	5028926	5028927	79	-	.	.	-1	-1	.	.	-1
chromosome_8	5028927	5028928	168	-	.	.	-1	-1	.	.	-1
chromosome_8	5028928	5028929	26	-	.	.	-1	-1	.	.	-1
chromosome_8	5028930	5028931	25	-	.	.	-1	-1	.	.	-1
chromosome_8	5028931	5028932	42	-	.	.	-1	-1	.	.	-1
chromosome_8	5028932	5028933	21	-	.	.	-1	-1	.	.	-1
chromosome_8	5028933	5028934	103	-	.	.	-1	-1	.	.	-1
chromosome_8	5028934	5028935	245	-	.	.	-1	-1	.	.	-1
chromosome_8	5028935	5028936	7006	-	.	.	-1	-1	.	.	-1
chromosome_8	5028937	5028938	30	-	.	.	-1	-1	.	.	-1
chromosome_8	5028938	5028939	80	-	.	.	-1	-1	.	.	-1
chromosome_8	5028939	5028940	27	-	.	.	-1	-1	.	.	-1
chromosome_8	5028940	5028941	192	-	.	.	-1	-1	.	.	-1
chromosome_8	5028941	5028942	371	-	.	.	-1	-1	.	.	-1
chromosome_8	5028942	5028943	3542	-	.	.	-1	-1	.	.	-1
chromosome_8	5028944	5028945	13	-	.	.	-1	-1	.	.	-1
chromosome_8	5028945	5028946	28	-	.	.	-1	-1	.	.	-1
chromosome_8	5028946	5028947	346	-	.	.	-1	-1	.	.	-1
chromosome_8	5028947	5028948	113	-	.	.	-1	-1	.	.	-1
chromosome_8	5028948	5028949	1498	-	.	.	-1	-1	.	.	-1
chromosome_8	5028951	5028952	55	-	.	.	-1	-1	.	.	-1
chromosome_8	5028952	5028953	145	-	.	.	-1	-1	.	.	-1
chromosome_8	5028953	5028954	743	-	.	.	-1	-1	.	.	-1
chromosome_8	5028955	5028956	20	-	.	.	-1	-1	.	.	-1
chromosome_8	5028962	5028963	25	-	.	.	-1	-1	.	.	-1
chromosome_8	5028967	5028968	17	-	.	.	-1	-1	.	.	-1
chromosome_8	5028968	5028969	20	-	.	.	-1	-1	.	.	-1
chromosome_8	5028974	5028975	27	-	.	.	-1	-1	.	.	-1
chromosome_8	5028978	5028979	30	-	.	.	-1	-1	.	.	-1
chromosome_8	5028981	5028982	19	-	.	.	-1	-1	.	.	-1
chromosome_8	5028991	5028992	24	-	.	.	-1	-1	.	.	-1
chromosome_8	5028992	5028993	416	-	.	.	-1	-1	.	.	-1
chromosome_8	5028993	5028994	47	-	.	.	-1	-1	.	.	-1
chromosome_8	5028994	5028995	20	-	.	.	-1	-1	.	.	-1
chromosome_8	5029004	5029005	16	-	.	.	-1	-1	.	.	-1
chromosome_8	5029011	5029012	24	-	.	.	-1	-1	.	.	-1
chromosome_8	5029012	5029013	201	-	.	.	-1	-1	.	.	-1
chromosome_8	5029013	5029014	2907	-	.	.	-1	-1	.	.	-1
chromosome_8	5029016	5029017	13	-	.	.	-1	-1	.	.	-1
chromosome_8	5029026	5029027	17	-	.	.	-1	-1	.	.	-1
chromosome_8	5029027	5029028	48	-	.	.	-1	-1	.	.	-1
chromosome_8	5029028	5029029	1410	-	.	.	-1	-1	.	.	-1
chromosome_8	5029030	5029031	20	-	.	.	-1	-1	.	.	-1
chromosome_8	5029035	5029036	21	-	.	.	-1	-1	.	.	-1
chromosome_8	5029036	5029037	46	-	.	.	-1	-1	.	.	-1
chromosome_8	5029037	5029038	185	-	.	.	-1	-1	.	.	-1
chromosome_8	5029038	5029039	28	-	.	.	-1	-1	.	.	-1
chromosome_8	5029043	5029044	50	-	.	.	-1	-1	.	.	-1
chromosome_8	5029044	5029045	79	-	.	.	-1	-1	.	.	-1
chromosome_8	5029136	5029137	16	-	.	.	-1	-1	.	.	-1
chromosome_8	5029270	5029271	10	-	.	.	-1	-1	.	.	-1
chromosome_8	5029334	5029335	11	-	.	.	-1	-1	.	.	-1
chromosome_8	5029353	5029354	40	-	.	.	-1	-1	.	.	-1
chromosome_8	5029365	5029366	65	-	.	.	-1	-1	.	.	-1
chromosome_8	5029383	5029384	22	-	.	.	-1	-1	.	.	-1
chromosome_8	5029385	5029386	38	-	.	.	-1	-1	.	.	-1
chromosome_8	5029386	5029387	89	-	.	.	-1	-1	.	.	-1
chromosome_8	5029452	5029453	14	-	.	.	-1	-1	.	.	-1
chromosome_8	5029453	5029454	17	-	.	.	-1	-1	.	.	-1
chromosome_8	5029555	5029556	71	-	.	.	-1	-1	.	.	-1
chromosome_8	5029558	5029559	12	-	.	.	-1	-1	.	.	-1
chromosome_8	5029559	5029560	10	-	.	.	-1	-1	.	.	-1
chromosome_8	5029617	5029618	12	-	.	.	-1	-1	.	.	-1
chromosome_8	5029738	5029739	25	-	.	.	-1	-1	.	.	-1
chromosome_8	5029739	5029740	20	-	.	.	-1	-1	.	.	-1
chromosome_8	5029753	5029754	159	-	.	.	-1	-1	.	.	-1
chromosome_8	5029757	5029758	16	-	.	.	-1	-1	.	.	-1
chromosome_8	5029758	5029759	650	-	.	.	-1	-1	.	.	-1
chromosome_8	5029862	5029863	78	-	.	.	-1	-1	.	.	-1
chromosome_8	5029863	5029864	401	-	.	.	-1	-1	.	.	-1
chromosome_8	5029870	5029871	10	-	.	.	-1	-1	.	.	-1
chromosome_8	5029881	5029882	11	-	.	.	-1	-1	.	.	-1
chromosome_8	5029882	5029883	32	-	.	.	-1	-1	.	.	-1
chromosome_8	5029888	5029889	22	-	.	.	-1	-1	.	.	-1
chromosome_8	5029890	5029891	24	-	.	.	-1	-1	.	.	-1
chromosome_8	5029970	5029971	18	-	.	.	-1	-1	.	.	-1
chromosome_8	5029971	5029972	16	-	.	.	-1	-1	.	.	-1
chromosome_8	5029972	5029973	23	-	.	.	-1	-1	.	.	-1
chromosome_8	5029973	5029974	132	-	.	.	-1	-1	.	.	-1
chromosome_8	5029974	5029975	22	-	.	.	-1	-1	.	.	-1
chromosome_8	5029975	5029976	69	-	.	.	-1	-1	.	.	-1
chromosome_8	5030104	5030105	10	-	.	.	-1	-1	.	.	-1
chromosome_8	5030105	5030106	75	-	.	.	-1	-1	.	.	-1
chromosome_8	5030106	5030107	86	-	.	.	-1	-1	.	.	-1
chromosome_8	5030220	5030221	11	-	.	.	-1	-1	.	.	-1
chromosome_8	5030221	5030222	47	-	.	.	-1	-1	.	.	-1
chromosome_8	5030222	5030223	130	-	.	.	-1	-1	.	.	-1
chromosome_8	5030243	5030244	10	-	.	.	-1	-1	.	.	-1
chromosome_8	5030245	5030246	63	-	.	.	-1	-1	.	.	-1
chromosome_8	5030246	5030247	11	-	.	.	-1	-1	.	.	-1
chromosome_8	5030247	5030248	52	-	.	.	-1	-1	.	.	-1
chromosome_8	5030248	5030249	547	-	.	.	-1	-1	.	.	-1
chromosome_8	5030249	5030250	128	-	.	.	-1	-1	.	.	-1
chromosome_8	5030250	5030251	3947	-	.	.	-1	-1	.	.	-1
chromosome_8	5030252	5030253	30	-	.	.	-1	-1	.	.	-1
chromosome_8	5030253	5030254	843	-	.	.	-1	-1	.	.	-1
chromosome_8	5030254	5030255	18	-	.	.	-1	-1	.	.	-1
chromosome_8	5030255	5030256	60	-	.	.	-1	-1	.	.	-1
chromosome_8	5030256	5030257	81	-	.	.	-1	-1	.	.	-1
chromosome_8	5030257	5030258	15	-	.	.	-1	-1	.	.	-1
chromosome_8	5030258	5030259	4729	-	.	.	-1	-1	.	.	-1
chromosome_8	5030259	5030260	2221	-	.	.	-1	-1	.	.	-1
chromosome_8	5030260	5030261	14	-	.	.	-1	-1	.	.	-1
chromosome_8	5030261	5030262	4891	-	.	.	-1	-1	.	.	-1
chromosome_8	5030262	5030263	52617	-	.	.	-1	-1	.	.	-1
chromosome_8	5030263	5030264	27	-	.	.	-1	-1	.	.	-1
chromosome_8	5030264	5030265	16	-	.	.	-1	-1	.	.	-1
chromosome_8	5030265	5030266	20	-	.	.	-1	-1	.	.	-1
chromosome_8	5030266	5030267	31	-	.	.	-1	-1	.	.	-1
chromosome_8	5030267	5030268	768	-	.	.	-1	-1	.	.	-1
chromosome_8	5030270	5030271	217	-	.	.	-1	-1	.	.	-1
chromosome_8	5030277	5030278	10	-	.	.	-1	-1	.	.	-1
chromosome_8	5030297	5030298	23	-	.	.	-1	-1	.	.	-1
chromosome_8	5030301	5030302	35	-	.	.	-1	-1	.	.	-1
chromosome_8	5030315	5030316	44	-	.	.	-1	-1	.	.	-1
chromosome_8	5030316	5030317	717	-	.	.	-1	-1	.	.	-1
chromosome_8	5030320	5030321	13	-	.	.	-1	-1	.	.	-1
chromosome_8	5030321	5030322	19	-	.	.	-1	-1	.	.	-1
chromosome_8	5030322	5030323	691	-	.	.	-1	-1	.	.	-1
chromosome_8	5030337	5030338	14	-	.	.	-1	-1	.	.	-1
chromosome_8	5030339	5030340	234	-	.	.	-1	-1	.	.	-1
chromosome_8	5030427	5030428	11	-	.	.	-1	-1	.	.	-1
chromosome_8	5030428	5030429	11	-	.	.	-1	-1	.	.	-1
chromosome_8	5030432	5030433	10	-	.	.	-1	-1	.	.	-1
chromosome_8	5030435	5030436	18	-	.	.	-1	-1	.	.	-1
chromosome_8	5030436	5030437	11	-	.	.	-1	-1	.	.	-1
chromosome_8	5030438	5030439	10	-	.	.	-1	-1	.	.	-1
chromosome_8	5030439	5030440	20	-	.	.	-1	-1	.	.	-1
chromosome_8	5030440	5030441	13	-	.	.	-1	-1	.	.	-1
chromosome_8	5030441	5030442	14	-	.	.	-1	-1	.	.	-1
chromosome_8	5030446	5030447	18	-	.	.	-1	-1	.	.	-1
chromosome_8	5030447	5030448	30	-	.	.	-1	-1	.	.	-1
chromosome_8	5030449	5030450	12	-	.	.	-1	-1	.	.	-1
chromosome_8	5030450	5030451	35	-	.	.	-1	-1	.	.	-1
chromosome_8	5030451	5030452	10	-	.	.	-1	-1	.	.	-1
chromosome_8	5030452	5030453	27	-	.	.	-1	-1	.	.	-1
chromosome_8	5030453	5030454	27	-	.	.	-1	-1	.	.	-1
chromosome_8	5030454	5030455	10	-	.	.	-1	-1	.	.	-1
chromosome_8	5030455	5030456	15	-	.	.	-1	-1	.	.	-1
chromosome_8	5030456	5030457	17	-	.	.	-1	-1	.	.	-1
chromosome_8	5030458	5030459	20	-	.	.	-1	-1	.	.	-1
chromosome_8	5030460	5030461	53	-	.	.	-1	-1	.	.	-1
chromosome_8	5030461	5030462	47	-	.	.	-1	-1	.	.	-1
chromosome_8	5030462	5030463	15	-	.	.	-1	-1	.	.	-1
chromosome_8	5030463	5030464	27	-	.	.	-1	-1	.	.	-1
chromosome_8	5030464	5030465	18	-	.	.	-1	-1	.	.	-1
chromosome_8	5030465	5030466	12	-	.	.	-1	-1	.	.	-1
chromosome_8	5030466	5030467	17	-	.	.	-1	-1	.	.	-1
chromosome_8	5030467	5030468	24	-	.	.	-1	-1	.	.	-1
chromosome_8	5030468	5030469	38	-	.	.	-1	-1	.	.	-1
chromosome_8	5030469	5030470	18	-	.	.	-1	-1	.	.	-1
chromosome_8	5030470	5030471	19	-	.	.	-1	-1	.	.	-1
chromosome_8	5030471	5030472	32	-	.	.	-1	-1	.	.	-1
chromosome_8	5030472	5030473	24	-	.	.	-1	-1	.	.	-1
chromosome_8	5030473	5030474	19	-	.	.	-1	-1	.	.	-1
chromosome_8	5030474	5030475	33	-	.	.	-1	-1	.	.	-1
chromosome_8	5030475	5030476	127	-	.	.	-1	-1	.	.	-1
chromosome_8	5030476	5030477	1148	-	.	.	-1	-1	.	.	-1
chromosome_8	5030477	5030478	16092	-	.	.	-1	-1	.	.	-1
chromosome_8	5030478	5030479	14	-	.	.	-1	-1	.	.	-1
chromosome_8	5030479	5030480	150	-	.	.	-1	-1	.	.	-1
chromosome_8	5030480	5030481	113	-	.	.	-1	-1	.	.	-1
chromosome_8	5030481	5030482	35	-	.	.	-1	-1	.	.	-1
chromosome_8	5030482	5030483	25	-	.	.	-1	-1	.	.	-1
chromosome_8	5030484	5030485	54	-	.	.	-1	-1	.	.	-1
chromosome_8	5030485	5030486	24	-	.	.	-1	-1	.	.	-1
chromosome_8	5030486	5030487	16	-	.	.	-1	-1	.	.	-1
chromosome_8	5030487	5030488	93	-	.	.	-1	-1	.	.	-1
chromosome_8	5030488	5030489	47	-	.	.	-1	-1	.	.	-1
chromosome_8	5030490	5030491	25	-	.	.	-1	-1	.	.	-1
chromosome_8	5030491	5030492	29	-	.	.	-1	-1	.	.	-1
chromosome_8	5030492	5030493	27	-	.	.	-1	-1	.	.	-1
chromosome_8	5030493	5030494	88	-	.	.	-1	-1	.	.	-1
chromosome_8	5030494	5030495	74	-	.	.	-1	-1	.	.	-1
chromosome_8	5030495	5030496	569	-	.	.	-1	-1	.	.	-1
chromosome_8	5030496	5030497	213	-	.	.	-1	-1	.	.	-1
chromosome_8	5030497	5030498	1279	-	.	.	-1	-1	.	.	-1
chromosome_8	5030498	5030499	30338	-	.	.	-1	-1	.	.	-1
chromosome_8	5030499	5030500	17674	-	.	.	-1	-1	.	.	-1
chromosome_8	5030500	5030501	36	-	.	.	-1	-1	.	.	-1
chromosome_8	5030501	5030502	23	-	.	.	-1	-1	.	.	-1
chromosome_8	5030502	5030503	85	-	.	.	-1	-1	.	.	-1
chromosome_8	5030503	5030504	91	-	.	.	-1	-1	.	.	-1
chromosome_8	5030504	5030505	36	-	.	.	-1	-1	.	.	-1
chromosome_8	5030505	5030506	45	-	.	.	-1	-1	.	.	-1
chromosome_8	5030506	5030507	114	-	.	.	-1	-1	.	.	-1
chromosome_8	5030507	5030508	48	-	.	.	-1	-1	.	.	-1
chromosome_8	5030508	5030509	162	-	.	.	-1	-1	.	.	-1
chromosome_8	5030509	5030510	88	-	.	.	-1	-1	.	.	-1
chromosome_8	5030510	5030511	292	-	.	.	-1	-1	.	.	-1
chromosome_8	5030511	5030512	174	-	.	.	-1	-1	.	.	-1
chromosome_8	5030512	5030513	713	-	.	.	-1	-1	.	.	-1
chromosome_8	5030513	5030514	1300	-	.	.	-1	-1	.	.	-1
chromosome_8	5030514	5030515	10724	-	.	.	-1	-1	.	.	-1
chromosome_8	5030515	5030516	115098	-	.	.	-1	-1	.	.	-1
chromosome_8	5030516	5030517	353012	-	.	.	-1	-1	.	.	-1
chromosome_8	5030517	5030518	2320	-	.	.	-1	-1	.	.	-1
chromosome_8	5030518	5030519	1697	-	.	.	-1	-1	.	.	-1
chromosome_8	5030519	5030520	2520	-	.	.	-1	-1	.	.	-1
chromosome_8	5030520	5030521	123	-	.	.	-1	-1	.	.	-1
chromosome_8	5030521	5030522	49	-	.	.	-1	-1	.	.	-1
chromosome_8	5030522	5030523	74	-	.	.	-1	-1	.	.	-1
chromosome_8	5030523	5030524	36	-	.	.	-1	-1	.	.	-1
chromosome_8	5030524	5030525	44	-	.	.	-1	-1	.	.	-1
chromosome_8	5030525	5030526	108	-	.	.	-1	-1	.	.	-1
chromosome_8	5030526	5030527	699	-	.	.	-1	-1	.	.	-1
chromosome_8	5030527	5030528	5258	-	.	.	-1	-1	.	.	-1
chromosome_8	5030528	5030529	121	-	.	.	-1	-1	.	.	-1
chromosome_8	5030529	5030530	829	-	.	.	-1	-1	.	.	-1
chromosome_8	5030530	5030531	62	-	.	.	-1	-1	.	.	-1
chromosome_8	5030531	5030532	343	-	.	.	-1	-1	.	.	-1
chromosome_8	5030532	5030533	105	-	.	.	-1	-1	.	.	-1
chromosome_8	5030533	5030534	165	-	.	.	-1	-1	.	.	-1
chromosome_8	5030534	5030535	1231	-	.	.	-1	-1	.	.	-1
chromosome_8	5030535	5030536	4297	-	.	.	-1	-1	.	.	-1
chromosome_8	5030536	5030537	288	-	.	.	-1	-1	.	.	-1
chromosome_8	5030537	5030538	369	-	.	.	-1	-1	.	.	-1
chromosome_8	5030538	5030539	254	-	.	.	-1	-1	.	.	-1
chromosome_8	5030539	5030540	2316	-	.	.	-1	-1	.	.	-1
chromosome_8	5030540	5030541	10333	-	.	.	-1	-1	.	.	-1
chromosome_8	5030541	5030542	115860	-	.	.	-1	-1	.	.	-1
chromosome_8	5030542	5030543	149	-	.	.	-1	-1	.	.	-1
chromosome_8	5030543	5030544	154	-	.	.	-1	-1	.	.	-1
chromosome_8	5030544	5030545	2167	-	.	.	-1	-1	.	.	-1
chromosome_8	5030545	5030546	14	-	.	.	-1	-1	.	.	-1
chromosome_8	5030546	5030547	322	-	.	.	-1	-1	.	.	-1
chromosome_8	5030547	5030548	507	-	.	.	-1	-1	.	.	-1
chromosome_8	5030548	5030549	63	-	.	.	-1	-1	.	.	-1
chromosome_8	5030549	5030550	36	-	.	.	-1	-1	.	.	-1
chromosome_8	5030550	5030551	37	-	.	.	-1	-1	.	.	-1
chromosome_8	5030551	5030552	171	-	.	.	-1	-1	.	.	-1
chromosome_8	5030552	5030553	387	-	.	.	-1	-1	.	.	-1
chromosome_8	5030553	5030554	582	-	.	.	-1	-1	.	.	-1
chromosome_8	5030554	5030555	3782	-	.	.	-1	-1	.	.	-1
chromosome_8	5030555	5030556	52	-	.	.	-1	-1	.	.	-1
chromosome_8	5030556	5030557	264	-	.	.	-1	-1	.	.	-1
chromosome_8	5030557	5030558	382	-	.	.	-1	-1	.	.	-1
chromosome_8	5030558	5030559	6614	-	.	.	-1	-1	.	.	-1
chromosome_8	5030559	5030560	14	-	.	.	-1	-1	.	.	-1
chromosome_8	5030560	5030561	57	-	.	.	-1	-1	.	.	-1
chromosome_8	5030561	5030562	155	-	.	.	-1	-1	.	.	-1
chromosome_8	5030562	5030563	335	-	.	.	-1	-1	.	.	-1
chromosome_8	5030563	5030564	1186	-	.	.	-1	-1	.	.	-1
chromosome_8	5030564	5030565	1973	-	.	.	-1	-1	.	.	-1
chromosome_8	5030565	5030566	38260	-	.	.	-1	-1	.	.	-1
chromosome_8	5030566	5030567	48	-	.	.	-1	-1	.	.	-1
chromosome_8	5030567	5030568	41	-	.	.	-1	-1	.	.	-1
chromosome_8	5030568	5030569	120	-	.	.	-1	-1	.	.	-1
chromosome_8	5030569	5030570	157	-	.	.	-1	-1	.	.	-1
chromosome_8	5030570	5030571	3408	-	.	.	-1	-1	.	.	-1
chromosome_8	5030571	5030572	407	-	.	.	-1	-1	.	.	-1
chromosome_8	5030572	5030573	607	-	.	.	-1	-1	.	.	-1
chromosome_8	5030573	5030574	7581	-	.	.	-1	-1	.	.	-1
chromosome_8	5030574	5030575	4759	-	.	.	-1	-1	.	.	-1
chromosome_8	5030575	5030576	7700	-	.	.	-1	-1	.	.	-1
chromosome_8	5030576	5030577	10437	-	.	.	-1	-1	.	.	-1
chromosome_8	5030577	5030578	310261	-	.	.	-1	-1	.	.	-1
chromosome_8	5030578	5030579	209	-	.	.	-1	-1	.	.	-1
chromosome_8	5030579	5030580	134	-	.	.	-1	-1	.	.	-1
chromosome_8	5030580	5030581	138	-	.	.	-1	-1	.	.	-1
chromosome_8	5030581	5030582	876	-	.	.	-1	-1	.	.	-1
chromosome_8	5030582	5030583	6108	-	.	.	-1	-1	.	.	-1
chromosome_8	5030583	5030584	696	-	.	.	-1	-1	.	.	-1
chromosome_8	5030584	5030585	770	-	.	.	-1	-1	.	.	-1
chromosome_8	5030585	5030586	494	-	.	.	-1	-1	.	.	-1
chromosome_8	5030586	5030587	783	-	.	.	-1	-1	.	.	-1
chromosome_8	5030587	5030588	1366	-	.	.	-1	-1	.	.	-1
chromosome_8	5030588	5030589	29389	-	.	.	-1	-1	.	.	-1
chromosome_8	5030589	5030590	34	-	.	.	-1	-1	.	.	-1
chromosome_8	5030590	5030591	21	-	.	.	-1	-1	.	.	-1
chromosome_8	5030591	5030592	35	-	.	.	-1	-1	.	.	-1
chromosome_8	5030592	5030593	94	-	.	.	-1	-1	.	.	-1
chromosome_8	5030593	5030594	121	-	.	.	-1	-1	.	.	-1
chromosome_8	5030594	5030595	72	-	.	.	-1	-1	.	.	-1
chromosome_8	5030595	5030596	89	-	.	.	-1	-1	.	.	-1
chromosome_8	5030596	5030597	822	-	.	.	-1	-1	.	.	-1
chromosome_8	5030597	5030598	866	-	.	.	-1	-1	.	.	-1
chromosome_8	5030598	5030599	1691	-	.	.	-1	-1	.	.	-1
chromosome_8	5030599	5030600	22930	-	.	.	-1	-1	.	.	-1
chromosome_8	5030600	5030601	185	-	.	.	-1	-1	.	.	-1
chromosome_8	5030601	5030602	45	-	.	.	-1	-1	.	.	-1
chromosome_8	5030602	5030603	84	-	.	.	-1	-1	.	.	-1
chromosome_8	5030607	5030608	11	-	.	.	-1	-1	.	.	-1
chromosome_8	5030608	5030609	71	-	.	.	-1	-1	.	.	-1
chromosome_8	5030610	5030611	40	-	.	.	-1	-1	.	.	-1
chromosome_8	5030611	5030612	20	-	.	.	-1	-1	.	.	-1
chromosome_8	5030612	5030613	93	-	.	.	-1	-1	.	.	-1
chromosome_8	5030613	5030614	1494	-	.	.	-1	-1	.	.	-1
chromosome_8	5030614	5030615	2817	-	.	.	-1	-1	.	.	-1
chromosome_8	5030615	5030616	20	-	.	.	-1	-1	.	.	-1
chromosome_8	5030616	5030617	82	-	.	.	-1	-1	.	.	-1
chromosome_8	5030617	5030618	51	-	.	.	-1	-1	.	.	-1
chromosome_8	5030618	5030619	35	-	.	.	-1	-1	.	.	-1
chromosome_8	5030619	5030620	318	-	.	.	-1	-1	.	.	-1
chromosome_8	5030620	5030621	14	-	.	.	-1	-1	.	.	-1
chromosome_8	5030645	5030646	13	-	.	.	-1	-1	.	.	-1
chromosome_8	5030653	5030654	20	-	.	.	-1	-1	.	.	-1
chromosome_8	5030680	5030681	16	-	.	.	-1	-1	.	.	-1
chromosome_8	5030687	5030688	10	-	.	.	-1	-1	.	.	-1
chromosome_8	5030688	5030689	148	-	.	.	-1	-1	.	.	-1
chromosome_8	5030690	5030691	82	-	.	.	-1	-1	.	.	-1
chromosome_8	5030696	5030697	71	-	.	.	-1	-1	.	.	-1
chromosome_8	5030697	5030698	13	-	.	.	-1	-1	.	.	-1
chromosome_8	5030698	5030699	11	-	.	.	-1	-1	.	.	-1
chromosome_8	5030699	5030700	186	-	.	.	-1	-1	.	.	-1
chromosome_8	5030705	5030706	12	-	.	.	-1	-1	.	.	-1
chromosome_8	5030707	5030708	19	-	.	.	-1	-1	.	.	-1
chromosome_8	5030708	5030709	48	-	.	.	-1	-1	.	.	-1
chromosome_8	5030709	5030710	446	-	.	.	-1	-1	.	.	-1
chromosome_8	5030710	5030711	18	-	.	.	-1	-1	.	.	-1
chromosome_8	5030711	5030712	2574	-	.	.	-1	-1	.	.	-1
chromosome_8	5030721	5030722	18	-	.	.	-1	-1	.	.	-1
chromosome_8	5030758	5030759	32	-	.	.	-1	-1	.	.	-1
chromosome_8	5030759	5030760	1020	-	.	.	-1	-1	.	.	-1
chromosome_8	5030762	5030763	24	-	.	.	-1	-1	.	.	-1
chromosome_8	5030764	5030765	22	-	.	.	-1	-1	.	.	-1
chromosome_8	5030765	5030766	87	-	.	.	-1	-1	.	.	-1
chromosome_8	5030766	5030767	220	-	.	.	-1	-1	.	.	-1
chromosome_8	5030798	5030799	52	-	.	.	-1	-1	.	.	-1
chromosome_8	5030799	5030800	744	-	.	.	-1	-1	.	.	-1
chromosome_8	5030800	5030801	18	-	.	.	-1	-1	.	.	-1
chromosome_8	5030801	5030802	15	-	.	.	-1	-1	.	.	-1
chromosome_8	5030802	5030803	52	-	.	.	-1	-1	.	.	-1
chromosome_8	5030803	5030804	20	-	.	.	-1	-1	.	.	-1
chromosome_8	5030809	5030810	11	-	.	.	-1	-1	.	.	-1
chromosome_8	5030810	5030811	14	-	.	.	-1	-1	.	.	-1
chromosome_8	5030811	5030812	141	-	.	.	-1	-1	.	.	-1
chromosome_8	5030813	5030814	50	-	.	.	-1	-1	.	.	-1
chromosome_8	5030822	5030823	16	-	.	.	-1	-1	.	.	-1
chromosome_8	5030830	5030831	15	-	.	.	-1	-1	.	.	-1
chromosome_8	5030832	5030833	13	-	.	.	-1	-1	.	.	-1
chromosome_8	5030834	5030835	11	-	.	.	-1	-1	.	.	-1
chromosome_8	5030882	5030883	151	-	.	.	-1	-1	.	.	-1
chromosome_8	5030916	5030917	11	-	.	.	-1	-1	.	.	-1
chromosome_8	5030922	5030923	10	-	.	.	-1	-1	.	.	-1
chromosome_8	5030923	5030924	32	-	.	.	-1	-1	.	.	-1
chromosome_8	5030961	5030962	41	-	.	.	-1	-1	.	.	-1
chromosome_8	5030995	5030996	50	-	.	.	-1	-1	.	.	-1
chromosome_8	5030996	5030997	155	-	.	.	-1	-1	.	.	-1
chromosome_8	5031009	5031010	10	-	.	.	-1	-1	.	.	-1
chromosome_8	5031036	5031037	10	-	.	.	-1	-1	.	.	-1
chromosome_8	5031072	5031073	43	-	.	.	-1	-1	.	.	-1
chromosome_8	5031093	5031094	11	-	.	.	-1	-1	.	.	-1
chromosome_8	5031101	5031102	14	-	.	.	-1	-1	.	.	-1
chromosome_8	5031102	5031103	26	-	.	.	-1	-1	.	.	-1
chromosome_8	5031103	5031104	327	-	.	.	-1	-1	.	.	-1
chromosome_8	5031152	5031153	12	-	.	.	-1	-1	.	.	-1
chromosome_8	5031184	5031185	14	-	.	.	-1	-1	.	.	-1
chromosome_8	5031185	5031186	29	-	.	.	-1	-1	.	.	-1
chromosome_8	5031190	5031191	20	-	.	.	-1	-1	.	.	-1
chromosome_8	5031191	5031192	139	-	.	.	-1	-1	.	.	-1
chromosome_8	5031211	5031212	16	-	.	.	-1	-1	.	.	-1
chromosome_8	5031307	5031308	63	-	.	.	-1	-1	.	.	-1
chromosome_8	5031319	5031320	15	-	.	.	-1	-1	.	.	-1
chromosome_8	5031320	5031321	259	-	.	.	-1	-1	.	.	-1
chromosome_8	5031322	5031323	11	-	.	.	-1	-1	.	.	-1
chromosome_8	5031337	5031338	19	-	.	.	-1	-1	.	.	-1
chromosome_8	5031363	5031364	10	-	.	.	-1	-1	.	.	-1
chromosome_8	5031364	5031365	87	-	.	.	-1	-1	.	.	-1
chromosome_8	5031388	5031389	111	-	.	.	-1	-1	.	.	-1
chromosome_8	5031390	5031391	78	-	.	.	-1	-1	.	.	-1
chromosome_8	5031399	5031400	22	-	.	.	-1	-1	.	.	-1
chromosome_8	5031401	5031402	130	-	.	.	-1	-1	.	.	-1
chromosome_8	5031403	5031404	18	-	.	.	-1	-1	.	.	-1
chromosome_8	5031404	5031405	22	-	.	.	-1	-1	.	.	-1
chromosome_8	5031405	5031406	510	-	.	.	-1	-1	.	.	-1
chromosome_8	5031406	5031407	10	-	.	.	-1	-1	.	.	-1
chromosome_8	5031407	5031408	269	-	.	.	-1	-1	.	.	-1
chromosome_8	5031408	5031409	12	-	.	.	-1	-1	.	.	-1
chromosome_8	5031409	5031410	608	-	.	.	-1	-1	.	.	-1
chromosome_8	5031416	5031417	78	-	.	.	-1	-1	.	.	-1
chromosome_8	5031419	5031420	14	-	.	.	-1	-1	.	.	-1
chromosome_8	5031421	5031422	19	-	.	.	-1	-1	.	.	-1
chromosome_8	5031437	5031438	21	-	.	.	-1	-1	.	.	-1
chromosome_8	5031438	5031439	577	-	.	.	-1	-1	.	.	-1
chromosome_8	5031473	5031474	12	-	.	.	-1	-1	.	.	-1
chromosome_8	5031474	5031475	43	-	.	.	-1	-1	.	.	-1
chromosome_8	5031487	5031488	14	-	.	.	-1	-1	.	.	-1
chromosome_8	5031488	5031489	323	-	.	.	-1	-1	.	.	-1
chromosome_8	5031489	5031490	1493	-	.	.	-1	-1	.	.	-1
chromosome_8	5031565	5031566	11	-	.	.	-1	-1	.	.	-1
chromosome_8	5031620	5031621	109	-	.	.	-1	-1	.	.	-1
chromosome_8	5031622	5031623	14	-	.	.	-1	-1	.	.	-1
chromosome_8	5031631	5031632	25	-	.	.	-1	-1	.	.	-1
chromosome_8	5031632	5031633	24	-	.	.	-1	-1	.	.	-1
chromosome_8	5031633	5031634	100	-	.	.	-1	-1	.	.	-1
chromosome_8	5031634	5031635	40	-	.	.	-1	-1	.	.	-1
chromosome_8	5031635	5031636	49	-	.	.	-1	-1	.	.	-1
chromosome_8	5031636	5031637	1040	-	.	.	-1	-1	.	.	-1
chromosome_8	5031637	5031638	222	-	.	.	-1	-1	.	.	-1
chromosome_8	5031638	5031639	424	-	.	.	-1	-1	.	.	-1
chromosome_8	5031639	5031640	5529	-	.	.	-1	-1	.	.	-1
chromosome_8	5031641	5031642	22	-	.	.	-1	-1	.	.	-1
chromosome_8	5031642	5031643	63	-	.	.	-1	-1	.	.	-1
chromosome_8	5031643	5031644	48	-	.	.	-1	-1	.	.	-1
chromosome_8	5031644	5031645	72	-	.	.	-1	-1	.	.	-1
chromosome_8	5031645	5031646	1849	-	.	.	-1	-1	.	.	-1
chromosome_8	5031646	5031647	1323	-	.	.	-1	-1	.	.	-1
chromosome_8	5031647	5031648	19763	-	.	.	-1	-1	.	.	-1
chromosome_8	5031648	5031649	14	-	.	.	-1	-1	.	.	-1
chromosome_8	5031649	5031650	11	-	.	.	-1	-1	.	.	-1
chromosome_8	5031650	5031651	153	-	.	.	-1	-1	.	.	-1
chromosome_8	5031651	5031652	205	-	.	.	-1	-1	.	.	-1
chromosome_8	5031652	5031653	3384	-	.	.	-1	-1	.	.	-1
chromosome_8	5031654	5031655	515	-	.	.	-1	-1	.	.	-1
chromosome_8	5031656	5031657	50	-	.	.	-1	-1	.	.	-1
chromosome_8	5031661	5031662	43	-	.	.	-1	-1	.	.	-1
chromosome_8	5031667	5031668	15	-	.	.	-1	-1	.	.	-1
chromosome_8	5031668	5031669	153	-	.	.	-1	-1	.	.	-1
chromosome_8	5031671	5031672	13	-	.	.	-1	-1	.	.	-1
chromosome_8	5031672	5031673	21	-	.	.	-1	-1	.	.	-1
chromosome_8	5031673	5031674	57	-	.	.	-1	-1	.	.	-1
chromosome_8	5031674	5031675	1019	-	.	.	-1	-1	.	.	-1
chromosome_8	5031676	5031677	528	-	.	.	-1	-1	.	.	-1
chromosome_8	5031690	5031691	28	-	.	.	-1	-1	.	.	-1
chromosome_8	5031693	5031694	13	-	.	.	-1	-1	.	.	-1
chromosome_8	5031694	5031695	13	-	.	.	-1	-1	.	.	-1
chromosome_8	5031695	5031696	26	-	.	.	-1	-1	.	.	-1
chromosome_8	5031696	5031697	706	-	.	.	-1	-1	.	.	-1
chromosome_8	5031698	5031699	10	-	.	.	-1	-1	.	.	-1
chromosome_8	5031716	5031717	20	-	.	.	-1	-1	.	.	-1
chromosome_8	5031720	5031721	30	-	.	.	-1	-1	.	.	-1
chromosome_8	5031721	5031722	86	-	.	.	-1	-1	.	.	-1
chromosome_8	5031765	5031766	37	-	.	.	-1	-1	.	.	-1
chromosome_8	5031766	5031767	615	-	.	.	-1	-1	.	.	-1
chromosome_8	5031767	5031768	15	-	.	.	-1	-1	.	.	-1
chromosome_8	5031768	5031769	26	-	.	.	-1	-1	.	.	-1
chromosome_8	5031769	5031770	266	-	.	.	-1	-1	.	.	-1
chromosome_8	5031770	5031771	2220	-	.	.	-1	-1	.	.	-1
chromosome_8	5031776	5031777	40	-	.	.	-1	-1	.	.	-1
chromosome_8	5031780	5031781	10	-	.	.	-1	-1	.	.	-1
chromosome_8	5031810	5031811	16	-	.	.	-1	-1	.	.	-1
chromosome_8	5031822	5031823	10	-	.	.	-1	-1	.	.	-1
chromosome_8	5031846	5031847	17	-	.	.	-1	-1	.	.	-1
chromosome_8	5031858	5031859	18	-	.	.	-1	-1	.	.	-1
chromosome_8	5031886	5031887	10	-	.	.	-1	-1	.	.	-1
chromosome_8	5031887	5031888	38	-	.	.	-1	-1	.	.	-1
chromosome_8	5031894	5031895	14	-	.	.	-1	-1	.	.	-1
chromosome_8	5031896	5031897	28	-	.	.	-1	-1	.	.	-1
chromosome_8	5031897	5031898	23	-	.	.	-1	-1	.	.	-1
chromosome_8	5031980	5031981	17	-	.	.	-1	-1	.	.	-1
chromosome_8	5031981	5031982	493	-	.	.	-1	-1	.	.	-1
chromosome_8	5032011	5032012	34	-	.	.	-1	-1	.	.	-1
chromosome_8	5032014	5032015	10	-	.	.	-1	-1	.	.	-1
chromosome_8	5032022	5032023	10	-	.	.	-1	-1	.	.	-1
chromosome_8	5032041	5032042	15	-	.	.	-1	-1	.	.	-1
chromosome_8	5032047	5032048	16	-	.	.	-1	-1	.	.	-1
chromosome_8	5032054	5032055	32	-	.	.	-1	-1	.	.	-1
chromosome_8	5032055	5032056	26	-	.	.	-1	-1	.	.	-1
chromosome_8	5032056	5032057	10	-	.	.	-1	-1	.	.	-1
chromosome_8	5032057	5032058	25	-	.	.	-1	-1	.	.	-1
chromosome_8	5032058	5032059	28	-	.	.	-1	-1	.	.	-1
chromosome_8	5032059	5032060	43	-	.	.	-1	-1	.	.	-1
chromosome_8	5032060	5032061	69	-	.	.	-1	-1	.	.	-1
chromosome_8	5032061	5032062	854	-	.	.	-1	-1	.	.	-1
chromosome_8	5032062	5032063	3686	-	.	.	-1	-1	.	.	-1
chromosome_8	5032063	5032064	54	-	.	.	-1	-1	.	.	-1
chromosome_8	5032064	5032065	1345	-	.	.	-1	-1	.	.	-1
chromosome_8	5032065	5032066	27	-	.	.	-1	-1	.	.	-1
chromosome_8	5032066	5032067	586	-	.	.	-1	-1	.	.	-1
chromosome_8	5032067	5032068	44	-	.	.	-1	-1	.	.	-1
chromosome_8	5032068	5032069	14	-	.	.	-1	-1	.	.	-1
chromosome_8	5032069	5032070	3046	-	.	.	-1	-1	.	.	-1
chromosome_8	5032071	5032072	51	-	.	.	-1	-1	.	.	-1
chromosome_8	5032073	5032074	13	-	.	.	-1	-1	.	.	-1
chromosome_8	5032076	5032077	44	-	.	.	-1	-1	.	.	-1
chromosome_8	5032078	5032079	15	-	.	.	-1	-1	.	.	-1
chromosome_8	5032080	5032081	11	-	.	.	-1	-1	.	.	-1
chromosome_8	5032083	5032084	26	-	.	.	-1	-1	.	.	-1
chromosome_8	5032084	5032085	32	-	.	.	-1	-1	.	.	-1
chromosome_8	5032085	5032086	96	-	.	.	-1	-1	.	.	-1
chromosome_8	5032086	5032087	177	-	.	.	-1	-1	.	.	-1
chromosome_8	5032087	5032088	75	-	.	.	-1	-1	.	.	-1
chromosome_8	5032088	5032089	47	-	.	.	-1	-1	.	.	-1
chromosome_8	5032089	5032090	1164	-	.	.	-1	-1	.	.	-1
chromosome_8	5032090	5032091	2413	-	.	.	-1	-1	.	.	-1
chromosome_8	5032091	5032092	55836	-	.	.	-1	-1	.	.	-1
chromosome_8	5032092	5032093	23	-	.	.	-1	-1	.	.	-1
chromosome_8	5032093	5032094	35	-	.	.	-1	-1	.	.	-1
chromosome_8	5032094	5032095	23	-	.	.	-1	-1	.	.	-1
chromosome_8	5032095	5032096	111	-	.	.	-1	-1	.	.	-1
chromosome_8	5032103	5032104	11	-	.	.	-1	-1	.	.	-1
chromosome_8	5032104	5032105	674	-	.	.	-1	-1	.	.	-1
chromosome_8	5032110	5032111	35	-	.	.	-1	-1	.	.	-1
chromosome_8	5032111	5032112	848	-	.	.	-1	-1	.	.	-1
chromosome_8	5032112	5032113	290	-	.	.	-1	-1	.	.	-1
chromosome_8	5032113	5032114	331	-	.	.	-1	-1	.	.	-1
chromosome_8	5032234	5032235	11	-	.	.	-1	-1	.	.	-1
chromosome_8	5032266	5032267	10	-	.	.	-1	-1	.	.	-1
chromosome_8	5032267	5032268	108	-	.	.	-1	-1	.	.	-1
[truncated: 3,282 more rows]
